# Supplementary material for: Nutrigenomics in Arma chinensis: Transcriptome Analysis of Arma chinensis Fed on Artificial Diet and Chinese Oak Silk Moth Antheraea pernyi Pupae
Source: PLoS One. 2013 Apr 11;8(4):e60881. doi: 10.1371/journal.pone.0060881 (PMC3623872; doi:10.1371/journal.pone.0060881)
Supplement: Table S4 — Top thirty differentially expressed genes. (DOC) [file pone.0060881.s007.doc]

**Table S4. Top thirty differentially expressed genes in libraries of *Arma chinensis* artificial diet-fed (AD_1) and Chinese oak silk moth pupae-fed (CY_1) treatments.**

| **Comparison** | **Unigene**  **ID** | **Hit Number** | **Discription** | **FDR** | **Fold Change** |
| --- | --- | --- | --- | --- | --- |
| **AD_1/CY_1**  **(up-regulated)** | **Unigene26203_All** | **gi|293340219|ref|XP_002724668.1|** | **PREDICTED: hypothetical protein [*Rattus norvegicus*] >gi|293351642|ref|XP_002727840.1| PREDICTED: hypothetical protein [*Rattus norvegicus*]** | **0** | **17.5568** |
| **Unigene26209_All** | **--** | **--** | **2.13E-262** | **16.5054** |
| **Unigene23689_All** | **gi|157105546|ref|XP_001648917.1|** | **hypothetical protein AaeL_AAEL014517 [*Aedes aegypti*] >gi|108868998|gb|EAT33223.1| conserved hypothetical protein [*Aedes aegypti*]** | **0** | **15.9997** |
| **Unigene32007_All** | **--** | **--** | **2.35E-78** | **15.6431** |
| **Unigene31994_All** | **gi|326429708|gb|EGD75278.1|** | **hypothetical protein PTSG_06930 [*Salpingoeca* *sp.* ATCC 50818]** | **2.16E-181** | **15.1392** |
| **Unigene23676_All** | **gi|342316092|gb|ABF56562.2|** | **cytochrome c oxidase subunit I [*Sus scrofa*]** | **1.05E-161** | **15.1281** |
| **Unigene32017_All** | **gi|209166104|gb|ACI41483.1|** | **cytochrome oxidase subunit II [*Sus scrofa*] >gi|209166118|gb|ACI41496.1| cytochrome oxidase subunit II [*Sus scrofa*] >gi|209166132|gb|ACI41509.1| cytochrome oxidase subunit II [*Sus scrofa*] >gi|209166146|gb|ACI41522.1| cytochrome oxidase subunit II [*Sus scrofa*] >gi|209166160|gb|ACI41535.1| cytochrome oxidase subunit II [*Sus scrofa*] >gi|209166174|gb|ACI41548.1| cytochrome oxidase subunit II [*Sus scrofa*] >gi|209166188|gb|ACI41561.1| cytochrome oxidase subunit II [*Sus scrofa*] >gi|209166202|gb|ACI41574.1| cytochrome oxidase subunit II [*Sus scrofa*] >gi|209166230|gb|ACI41600.1| cytochrome oxidase subunit II [*Sus scrofa*] >gi|209166272|gb|ACI41639.1| cytochrome oxidase subunit II [*Sus scrofa*]** | **3.81E-140** | **15.0606** |
| **Unigene32005_All** | **gi|37719398|gb|AAR01785.1|** | **ATP synthase F0 subunit 6 [*Sus scrofa*]** | **5.09E-142** | **14.6856** |
| **Unigene31649_All** | **--** | **--** | **2.87E-143** | **14.5966** |
| **Unigene26739_All** | **gi|145315777|gb|ABP63312.1|** | **NADH dehydrogenase subunit 1 [*Sus scrofa*]** | **1.47E-56** | **13.8048** |
| **Unigene26698_All** | **--** | **--** | **2.45E-32** | **13.7048** |
| **Unigene30583_All** | **gi|157056528|gb|ABV02160.1|** | **NADH dehydrogenase subunit 3 [*Sus scrofa*]** | **3.22E-25** | **13.671** |
| **CL4900.Contig1_All** | **gi|145386514|ref|NP_001078814.1|** | **apidermin 1 precursor [*Apis mellifera*]** | **2.25E-15** | **13.6344** |
| **Unigene30641_All** | **gi|270002906|gb|EEZ99353.1|** | **tollo [*Tribolium castaneum*]** | **3.30E-21** | **13.6229** |
| **Unigene30545_All** | **--** | **--** | **1.36E-20** | **13.4861** |
| **Unigene26722_All** | **gi|312233373|ref|YP_004021584.1|** | **NADH dehydrogenase subunit 4 [*Sus scrofa taiwanensis*] >gi|83779141|gb|ABC47385.1| NADH dehydrogenase subunit 4 [*Sus scrofa*] >gi|125213072|dbj|BAF46412.1| NADH dehydrogenase subunit 4 [*Sus scrofa*]**  **>gi|145315438|gb|ABP62998.1| NADH dehydrogenase subunit 4 [*Sus scrofa*] >gi|145315452|gb|ABP63011.1| NADH dehydrogenase subunit 4 [*Sus scrofa*] >gi|145315466|gb|ABP63024.1| NADH dehydrogenase subunit 4 [*Sus scrofa*]**  **>gi|145315480|gb|ABP63037.1| NADH dehydrogenase subunit 4 [*Sus scrofa*] >gi|145315494|gb|ABP63050.1| NADH dehydrogenase subunit 4 [*Sus scrofa*] >gi|145315508|gb|ABP63063.1|**  **NADH dehydrogenase subunit 4**  **[*Sus scrofa*] >gi|145315522|gb|ABP63076.1| NADH dehydrogenase subunit 4 [*Sus scrofa*] >gi|145315536|gb|ABP63089.1| NADH dehydrogenase subunit 4 [*Sus scrofa*] >gi|145315550|gb|ABP63102.1| NADH dehydrogenase subunit 4 [*Sus scrofa*] >gi|145315564|gb|ABP63115.1| NADH dehydrogenase subunit 4 [*Sus scrofa*] >gi|145315578|gb|ABP63128.1| NADH dehydrogenase subunit 4 [*Sus scrofa*] >gi|145315592|gb|ABP63141.1| NADH dehydrogenase subunit 4 [*Sus scrofa*] >gi|145315606|gb|ABP63154.1| NADH dehydrogenase subunit 4 [*Sus scrofa*] >gi|145315620|gb|ABP63167.1| NADH dehydrogenase subunit 4 [*Sus scrofa*] >gi|145315634|gb|ABP63180.1| NADH dehydrogenase subunit 4 [*Sus scrofa*] >gi|145315648|gb|ABP63193.1| NADH dehydrogenase subunit 4 [*Sus scrofa*] >gi|145315662|gb|ABP63206.1| NADH dehydrogenase subunit 4 [*Sus scrofa*] >gi|145315676|gb|ABP63219.1| NADH dehydrogenase subunit 4 [*Sus scrofa*] >gi|145315690|gb|ABP63232.1| NADH dehydrogenase subunit 4 [*Sus scrofa*] >gi|145315704|gb|ABP63245.1| NADH dehydrogenase subunit 4 [*Sus scrofa*] >gi|145315718|gb|ABP63258.1| NADH dehydrogenase subunit 4 [*Sus scrofa*] >gi|145315732|gb|ABP63271.1| NADH dehydrogenase subunit 4 [*Sus scrofa*] >gi|145315746|gb|ABP63284.1| NADH dehydrogenase subunit 4 [*Sus scrofa*] >gi|145315760|gb|ABP63297.1| NADH dehydrogenase subunit 4 [*Sus scrofa*] >gi|145315800|gb|ABP63334.1| NADH dehydrogenase subunit 4 [*Sus scrofa*] >gi|157056545|gb|ABV02176.1| NADH dehydrogenase subunit 4 [*Sus scrofa*] >gi|225580662|gb|ABE02597.2| NADH dehydrogenase subunit 4 [*Sus scrofa*] >gi|238625878|gb|ACR48205.1| NADH dehydrogenase subunit 4 [*Sus scrofa*] >gi|269812094|gb|ACZ44406.1| NADH dehydrogenase subunit 4 [*Sus scrofa taiwanensis*]** | **3.05E-104** | **13.3973** |
| **Unigene30622_All** | **--** | **--** | **3.14E-47** | **13.3574** |
| **Unigene30614_All** | **--** | **--** | **2.35E-78** | **13.2611** |
| **Unigene26700_All** | **gi|33320783|gb|AAQ06072.1|** | **NADH dehydrogenase subunit 2 [*Sus scrofa*] >gi|33320825|gb|AAQ06111.1| NADH dehydrogenase subunit 2 [*Sus scrofa*] >gi|33320909|gb|AAQ06189.1| NADH dehydrogenase subunit 2 [*Sus scrofa*] >gi|80972994|gb|ABB53225.1| NADH dehydrogenase subunit 2 [*Sus scrofa*]** | **3.89E-53** | **13.2453** |
| **Unigene24987_All** | **gi|270014227|gb|EFA10675.1|** | **kinesin heavy chain [*Tribolium castaneum*]** | **1.26E-12** | **13.1298** |
| **Unigene20936_All** | **--** | **--** | **8.37E-11** | **13.0846** |
| **Unigene32048_All** | **--** | **--** | **2.92E-42** | **13.0533** |
| **CL495.Contig2_All** | **--** | **--** | **9.43E-23** | **13.0349** |
| **Unigene33433_All** | **--** | **--** | **3.37E-10** | **12.9653** |
| **Unigene24956_All** | **gi|345487497|ref|XP_001600183.2|** | **PREDICTED: ras-related C3 botulinum toxin substrate 1 [*Nasonia vitripennis*]** | **9.21E-15** | **12.953** |
| **Unigene32996_All** | **--** | **--** | **4.16E-11** | **12.9422** |
| **Unigene22072_All** | **gi|164614625|gb|ABY64538.1|** | **alpha 1 S haptoglobin [*Sus scrofa*]** | **1.08E-27** | **12.9385** |
| **CL3120.Contig2_All** | **--** | **--** | **1.26E-12** | **12.9031** |
| **Unigene32229_All** | **gi|328703354|ref|XP_001944392.2|** | **PREDICTED: formin-like protein CG32138-like [*Acyrthosiphon pisum*]** | **4.71E-19** | **12.8991** |
| **Unigene22152_All** | **gi|5835874|ref|NP_008645.1|ND6_15069** | **NADH dehydrogenase subunit 6 [*Sus scrofa*] >gi|223976090|ref|YP_002600788.1| NADH dehydrogenase subunit 6 [*Sus scrofa domesticus*] >gi|6093585|sp|O79882.1|NU6M_PIG RecName: Full=NADH-ubiquinone oxidoreductase chain 6; AltName: Full=NADH dehydrogenase subunit 6 >gi|4958963|gb|AAD34196.1|AF034253_12 NADH dehydrogenase subunit 6 [*Sus scrofa*] >gi|11055641|gb|AAG28188.1|AF304200_12 NADH6 [*Sus scrofa*] >gi|11055655|gb|AAG28201.1|AF304201_12 NADH6 [*Sus scrofa*] >gi|11055669|gb|AAG28214.1|AF304202_12 NADH6 [*Sus scrofa*] >gi|11055683|gb|AAG28227.1|AF304203_12 NADH6 [*Sus scrofa*] >gi|3702658|emb|CAA05238.1| NADH dehydrogenase subunit 6 [*Sus scrofa*] >gi|33320695|gb|AAQ05991.1| NADH dehydrogenase subunit 6 [*Sus scrofa*] >gi|33320709|gb|AAQ06004.1| NADH dehydrogenase subunit 6 [*Sus scrofa*] >gi|33320723|gb|AAQ06017.1| NADH dehydrogenase subunit 6 [*Sus scrofa*] >gi|33320737|gb|AAQ06030.1| NADH dehydrogenase subunit 6 [*Sus scrofa*] >gi|33320751|gb|AAQ06043.1| NADH dehydrogenase subunit 6 [*Sus scrofa*] >gi|33320765|gb|AAQ06056.1| NADH dehydrogenase subunit 6 [*Sus scrofa*] >gi|33320779|gb|AAQ06069.1| NADH dehydrogenase subunit 6 [*Sus scrofa*] >gi|33320793|gb|AAQ06082.1| NADH dehydrogenase subunit 6 [*Sus scrofa*] >gi|33320807|gb|AAQ06095.1| NADH dehydrogenase subunit 6 [*Sus scrofa*] >gi|33320821|gb|AAQ06108.1| NADH dehydrogenase subunit 6 [*Sus scrofa*] >gi|33320835|gb|AAQ06121.1| NADH dehydrogenase subunit 6 [*Sus scrofa*] >gi|33320849|gb|AAQ06134.1| NADH dehydrogenase subunit 6 [*Sus scrofa*] >gi|33320863|gb|AAQ06147.1| NADH dehydrogenase subunit 6 [*Sus scrofa*] >gi|33320877|gb|AAQ06160.1| NADH dehydrogenase subunit 6 [*Sus scrofa*] >gi|33320891|gb|AAQ06173.1| NADH dehydrogenase subunit 6 [*Sus scrofa*] >gi|33320905|gb|AAQ06186.1| NADH dehydrogenase subunit 6 [*Sus scrofa*] >gi|33320919|gb|AAQ06199.1| NADH dehydrogenase subunit 6 [*Sus scrofa*] >gi|33320933|gb|AAQ06212.1| NADH dehydrogenase subunit 6 [*Sus scrofa*] >gi|33320947|gb|AAQ06225.1| NADH dehydrogenase subunit 6 [*Sus scrofa*] >gi|33320961|gb|AAQ06238.1| NADH dehydrogenase subunit 6 [*Sus scrofa*] >gi|37719404|gb|AAR01791.1| NADH dehydrogenase subunit 6 [*Sus scrofa*] >gi|45826181|gb|AAS77702.1| NADH dehydrogenase subunit 6 [*Sus scrofa*] >gi|45826195|gb|AAS77715.1| NADH dehydrogenase subunit 6 [*Sus scrofa*] >gi|45826209|gb|AAS77728.1| NADH dehydrogenase subunit 6 [*Sus scrofa*] >gi|76262533|gb|ABA41421.1| NADH dehydrogenase subunit 6 [*Sus scrofa*] >gi|76262561|gb|ABA41447.1| NADH dehydrogenase subunit 6 [*Sus scrofa*] >gi|78499546|gb|ABB45799.1| NADH dehydrogenase subunit 6 [*Sus scrofa*] >gi|80973004|gb|ABB53235.1| NADH dehydrogenase subunit 6 [*Sus scrofa*] >gi|83779143|gb|ABC47387.1| NADH dehydrogenase subunit 6 [*Sus scrofa*] >gi|83779157|gb|ABC47400.1| NADH dehydrogenase subunit 6 [*Sus scrofa*] >gi|90969046|gb|ABE02599.1| NADH dehydrogenase subunit 6 [*Sus scrofa*] >gi|94981332|gb|ABF49560.1| NADH dehydrogenase subunit 6 [*Sus scrofa*] >gi|95116716|gb|ABF56571.1| NADH dehydrogenase subunit 6 [*Sus scrofa*] >gi|124249819|gb|ABM92892.1| NADH dehydrogenase subunit 6 [*Sus scrofa*] >gi|125213074|dbj|BAF46414.1| NADH dehydrogenase subunit 6 [*Sus scrofa*] >gi|145315440|gb|ABP63000.1| NADH dehydrogenase subunit 6 [*Sus scrofa*] >gi|145315454|gb|ABP63013.1| NADH dehydrogenase subunit 6 [*Sus scrofa*] >gi|145315468|gb|ABP63026.1| NADH dehydrogenase subunit 6 [*Sus scrofa*] >gi|145315482|gb|ABP63039.1| NADH dehydrogenase subunit 6 [*Sus scrofa*] >gi|145315496|gb|ABP63052.1| NADH dehydrogenase subunit 6 [*Sus scrofa*] >gi|145315510|gb|ABP63065.1| NADH dehydrogenase subunit 6 [*Sus scrofa*] >gi|145315524|gb|ABP63078.1| NADH dehydrogenase subunit 6 [*Sus scrofa*] >gi|145315538|gb|ABP63091.1| NADH dehydrogenase subunit 6 [*Sus scrofa*] >gi|145315552|gb|ABP63104.1| NADH dehydrogenase subunit 6 [*Sus scrofa*] >gi|145315566|gb|ABP63117.1| NADH dehydrogenase subunit 6 [*Sus scrofa*] >gi|145315580|gb|ABP63130.1| NADH dehydrogenase subunit 6 [*Sus scrofa*] >gi|145315608|gb|ABP63156.1| NADH dehydrogenase subunit 6 [*Sus scrofa*] >gi|145315622|gb|ABP63169.1| NADH dehydrogenase subunit 6 [*Sus scrofa*] >gi|145315636|gb|ABP63182.1| NADH dehydrogenase subunit 6 [*Sus scrofa*] >gi|145315650|gb|ABP63195.1| NADH dehydrogenase subunit 6 [*Sus scrofa*] >gi|145315692|gb|ABP63234.1| NADH dehydrogenase subunit 6 [*Sus scrofa*] >gi|145315720|gb|ABP63260.1| NADH dehydrogenase subunit 6 [*Sus scrofa*] >gi|145315734|gb|ABP63273.1| NADH dehydrogenase subunit 6 [*Sus scrofa*] >gi|145315748|gb|ABP63286.1| NADH dehydrogenase subunit 6 [*Sus scrofa*] >gi|145315762|gb|ABP63299.1| NADH dehydrogenase subunit 6 [*Sus scrofa*] >gi|145315802|gb|ABP63336.1| NADH dehydrogenase subunit 6 [*Sus scrofa*] >gi|156144892|gb|ABK62696.2| NADH dehydrogenase subunit 6 [*Sus scrofa*] >gi|157056437|gb|ABV02139.1| NADH dehydrogenase subunit 6 [*Sus scrofa*] >gi|157056532|gb|ABV02164.1| NADH dehydrogenase subunit 6 [*Sus scrofa*] >gi|157144257|dbj|BAF80082.1| NADH dehydrogenase subunit 6 [*Sus scrofa*] >gi|162423279|gb|ABX89420.1| NADH dehydrogenase subunit 6 [*Sus scrofa*] >gi|209166112|gb|ACI41491.1| NADH dehydrogenase subunit 6 [*Sus scrofa*] >gi|209166126|gb|ACI41504.1| NADH dehydrogenase subunit 6 [*Sus scrofa*] >gi|209166140|gb|ACI41517.1| NADH dehydrogenase subunit 6 [*Sus scrofa*] >gi|209166154|gb|ACI41530.1| NADH dehydrogenase subunit 6 [*Sus scrofa*] >gi|209166168|gb|ACI41543.1| NADH dehydrogenase subunit 6 [*Sus scrofa*] >gi|209166182|gb|ACI41556.1| NADH dehydrogenase subunit 6 [*Sus scrofa*] >gi|209166210|gb|ACI41582.1| NADH dehydrogenase subunit 6 [*Sus scrofa*] >gi|209166224|gb|ACI41595.1| NADH dehydrogenase subunit 6 [*Sus scrofa*] >gi|209166238|gb|ACI41608.1| NADH dehydrogenase subunit 6 [*Sus scrofa*] >gi|209166252|gb|ACI41621.1| NADH dehydrogenase subunit 6 [*Sus scrofa*] >gi|209166266|gb|ACI41634.1| NADH dehydrogenase subunit 6 [*Sus scrofa*] >gi|209166280|gb|ACI41647.1| NADH dehydrogenase subunit 6 [*Sus scrofa*] >gi|223972371|dbj|BAH23404.1| NADH dehydrogenase subunit 6 [*Sus scrofa* *domestica*] >gi|238625880|gb|ACR48207.1| NADH dehydrogenase subunit 6 [*Sus scrofa*] >gi|238625894|gb|ACR48220.1| NADH dehydrogenase subunit 6 [*Sus scrofa*] >gi|251829661|gb|ACT21214.1| NADH dehydrogenase subunit 6 [*Sus scrofa*]** | **2.20E-27** | **12.7648** |
| **AD_1/CY_1**  **(down-regulated)** | **Unigene37512_All** | **--** | **--** | **0** | **-17.3529** |
| **Unigene42112_All** | **gi|238694154|ref|YP_002922064.1|** | **ATP synthase F0 subunit 6 [*Antheraea yamamai*] >gi|189342962|gb|ACD91994.1| ATP synthase F0 subunit 6 [*Antheraea yamamai*]** | **1.47E-55** | **-14.72** |
| **Unigene42154_All** | **--** | **--** | **9.92E-107** | **-14.3679** |
| **Unigene42126_All** | **gi|238694161|ref|YP_002922071.1|** | **cytochrome b [*Antheraea yamamai*] >gi|189342969|gb|ACD92001.1| cytochrome b [*Antheraea yamamai*]** | **3.16E-74** | **-14.2263** |
| **Unigene42135_All** | **--** | **--** | **3.11E-97** | **-14.1846** |
| **Unigene41833_All** | **--** | **--** | **1.16E-44** | **-14.1761** |
| **Unigene41784_All** | **gi|340506702|gb|EGR32785.1|** | **hypothetical protein IMG5_070670 [*Ichthyophthirius multifiliis*]** | **1.06E-102** | **-14.1626** |
| **Unigene38096_All** | **--** | **--** | **1.65E-25** | **-13.9938** |
| **Unigene38053_All** | **gi|154343495|ref|XP_001567693.1|** | **ribosomal protein l3 [*Leishmania braziliensis* MHOM/BR/75/M2904]** | **4.43E-26** | **-13.9167** |
| **Unigene40967_All** | **--** | **--** | **5.73E-19** | **-13.8012** |
| **Unigene38041_All** | **gi|24415597|gb|AAN52157.1|** | **cytochrome oxidase subunit II [*Antheraea pernyi*]** | **3.21E-27** | **-13.7521** |
| **Unigene38034_All** | **--** | **--** | **3.18E-25** | **-13.7218** |
| **CL3582.Contig2_All** | **gi|90959527|dbj|BAE92616.1|** | **PvLEA1 protein [*Polypedilum vanderplanki*]** | **8.66E-32** | **-13.6889** |
| **Unigene34025_All** | **gi|71749502|ref|XP_828090.1|** | **hypothetical protein [*Trypanosoma brucei* TREU927] >gi|70833474|gb|EAN78978.1| hypothetical protein Tb10.61.0020 [*Trypanosoma brucei brucei strain* 927/4 GUTat10.1]** | **4.48E-38** | **-13.6887** |
| **Unigene33997_All** | **gi|322494579|emb|CBZ29881.1|** | **beta tubulin [*Leishmania mexicana* MHOM/GT/2001/U1103]** | **1.80E-66** | **-13.6265** |
| **Unigene41798_All** | **gi|154335074|ref|XP_001563777.1|** | **elongation factor 1-alpha [*Leishmania braziliensis* MHOM/BR/75/M2904] >gi|134060806|emb|CAM37822.1| elongation factor 1-alpha [*Leishmania braziliensis* MHOM/BR/75/M2904]** | **3.58E-64** | **-13.5809** |
| **Unigene38027_All** | **--** | **--** | **8.61E-38** | **-13.5572** |
| **Unigene34782_All** | **gi|71420711|ref|XP_811581.1|** | **40S ribosomal protein S27 [*Trypanosoma cruzi strain* CL Brener] >gi|71654414|ref|XP_815827.1| 40S ribosomal protein S27 [*Trypanosoma cruzi strain* CL Brener] >gi|71660305|ref|XP_821870.1| ribosomal protein S27 [*Trypanosoma cruzi* strain CL Brener]** | **5.74E-19** | **-13.51** |
| **Unigene34820_All** | **--** | **--** | **8.23E-22** | **-13.4861** |
| **Unigene34832_All** | **gi|3868784|dbj|BAA34219.1|** | **MBF2 [*Samia cynthia*]** | **1.42E-15** | **-13.4305** |
| **Unigene38067_All** | **--** | **--** | **2.21E-98** | **-13.4084** |
| **Unigene38110_All** | **--** | **--** | **8.07E-50** | **-13.3917** |
| **Unigene38038_All** | **gi|1764109|gb|AAC64661.1|** | **pacifastin light chain precursor [*Pacifastacus leniusculus*]** | **1.66E-37** | **-13.3908** |
| **Unigene34831_All** | **--** | **--** | **7.81E-18** | **-13.3704** |
| **Unigene34301_All** | **--** | **--** | **7.42E-16** | **-13.3698** |
| **Unigene41003_All** | **gi|364023679|gb|AEW46914.1|** | **seminal fluid protein CSSFP066 [*Chilo suppressalis*]** | **2.99E-19** | **-13.3655** |
| **Unigene34212_All** | **gi|154334610|ref|XP_001563552.1|** | **60S ribosomal protein L6 [*Leishmania braziliensis* MHOM/BR/75/M2904]** | **2.18E-20** | **-13.2461** |
| **Unigene40938_All** | **--** | **--** | **4.07E-18** | **-13.2237** |
| **Unigene40997_All** | **gi|357601811|gb|EHJ63159.1|** | **serine protease inhibitor 28 [*Danaus plexippus*]** | **4.45E-28** | **-13.175** |
| **Unigene42685_All** | **--** | **--** | **8.51E-11** | **-13.1086** |

**The expression fold changes were performed with log 2 ratio.**
