# Supplementary material for: Nutrigenomics in Arma chinensis: Transcriptome Analysis of Arma chinensis Fed on Artificial Diet and Chinese Oak Silk Moth Antheraea pernyi Pupae
Source: PLoS One. 2013 Apr 11;8(4):e60881. doi: 10.1371/journal.pone.0060881 (PMC3623872; doi:10.1371/journal.pone.0060881)
Supplement: Table S10 — Putative SNPs in CY_1 Arma chinensis (2). (XLS) [file pone.0060881.s013.xls]

## Sheet: Putative SNPs in CY_1 (2)
Table S10. Putative SNPs in CY_1 Arma chinensis (2)
GeneID	Coordinate	Reference	Consensus	Quality	BestHit	QualityOfBestHit	UniqReadsNumOfBestHit	AllReadsNumOfBestHit	SecondHit	QualityOfSecondhit	UniqReadsNumOfSecondHit	AllReadsNumOfSecondHit	TotalDepth	RankSum	EstimateCopyNumber	dbSNPTag	DistanceGromLastSNP
Unigene16064_All	615	G	R	99	G	33	89	89	A	32	39	39	128	0.425064	1	0	77
Unigene16064_All	942	C	S	99	C	35	157	157	G	37	23	23	180	0.119331	1	0	108
Unigene16064_All	1050	G	R	99	G	36	36	36	A	36	18	18	54	0.726496	1	0	108
Unigene16065_All	33	A	R	41	A	38	17	17	G	38	6	6	23	0.716212	1	0	138
Unigene16065_All	171	T	Y	99	T	37	53	53	C	35	20	20	73	0.227139	1	0	138
Unigene16065_All	339	C	Y	99	C	30	41	41	T	32	25	25	67	0.157538	1	0	5
Unigene16065_All	344	G	S	99	G	33	63	63	C	32	14	14	78	0.484197	1	0	5
Unigene16065_All	363	G	R	99	G	35	102	102	A	35	32	32	134	0.206305	1	0	12
Unigene16065_All	375	G	R	99	G	36	102	102	A	37	32	32	134	0.0920697	1	0	12
Unigene16065_All	399	A	R	99	A	36	107	107	G	36	31	31	138	0.338784	1	0	24
Unigene16065_All	513	G	K	99	G	36	73	73	T	38	20	20	93	0.102571	1	0	102
Unigene16065_All	921	G	K	99	T	38	20	20	G	35	8	8	28	0.0200362	1	0	179
Unigene16066_All	103	A	R	99	G	35	35	35	A	35	17	17	52	0.287578	1	0	87
Unigene16066_All	267	C	M	99	C	33	144	144	A	33	34	34	179	0.140371	1	0	82
Unigene16066_All	349	C	Y	99	C	37	121	121	T	38	42	42	164	0.312249	1	0	82
Unigene16066_All	631	T	W	99	A	34	47	47	T	33	16	16	63	0.368384	1	0	75
Unigene16066_All	706	G	R	99	A	34	21	21	G	36	9	9	30	0.28152	1	0	24
Unigene16066_All	730	C	Y	99	T	35	24	24	C	35	9	9	33	0.353013	1	0	24
Unigene16066_All	774	T	Y	33	T	36	18	18	C	38	5	5	23	0.514369	1	0	44
Unigene16066_All	828	C	Y	67	C	36	15	15	T	39	9	9	24	0.501678	1	0	54
Unigene16066_All	952	A	R	92	G	37	45	45	A	35	9	9	54	0.0701367	1	0	124
Unigene16067_All	59	C	Y	68	C	36	69	69	T	36	10	10	79	0.401042	1	0	226
Unigene16067_All	424	A	R	99	A	35	126	126	G	36	14	14	141	0.386575	1	0	138
Unigene16067_All	562	G	K	50	G	34	58	58	T	35	8	8	66	0.488245	1	0	111
Unigene16067_All	673	G	S	60	G	33	33	33	C	33	7	7	40	0.722324	1	0	51
Unigene16067_All	724	A	M	29	A	34	33	33	C	31	7	7	40	0.73613	1	0	51
Unigene16067_All	820	G	R	29	G	37	21	21	A	36	5	5	26	0.474901	1	0	58
Unigene16068_All	52	G	R	99	A	38	18	18	G	36	14	14	32	0.53374	1	0	426
Unigene16068_All	478	A	R	99	A	38	107	107	G	37	81	81	188	0.11605	1	0	228
Unigene16068_All	1049	T	Y	99	T	38	35	35	C	34	24	24	59	0.500301	1	0	7
Unigene16068_All	1056	G	K	99	G	36	43	43	T	36	15	15	58	0.246322	1	0	7
Unigene1606_All	73	T	Y	99	C	37	102	102	T	38	94	94	196	0.00160044	1	0	14
Unigene1606_All	87	G	K	99	T	38	185	185	G	36	34	34	219	0.0179454	1	0	14
Unigene1606_All	104	A	W	99	T	36	177	177	A	38	38	38	215	0.0653027	1	0	17
Unigene1606_All	348	C	Y	99	C	34	162	162	T	35	93	93	297	0.421351	1	0	84
Unigene1606_All	432	T	Y	99	T	35	135	135	C	33	19	19	154	0.0379876	1	0	84
Unigene1606_All	645	C	Y	99	T	33	26	26	C	32	12	12	38	0.349327	1	0	12
Unigene1606_All	657	T	W	99	A	33	23	23	T	33	10	10	33	0.738487	1	0	6
Unigene1606_All	663	G	R	99	G	35	20	20	A	33	13	13	33	0.0847185	1	0	6
Unigene1606_All	720	G	R	97	A	37	38	38	G	35	10	10	48	0.0180281	1	0	57
Unigene1606_All	906	A	W	99	A	37	67	67	T	36	13	13	80	0.133811	1	0	56
Unigene16070_All	521	C	Y	99	T	37	25	25	C	37	14	14	39	0.735602	1	0	9
Unigene16070_All	530	G	R	99	A	35	20	20	G	36	19	19	39	0.141429	1	0	9
Unigene16070_All	830	C	M	55	C	37	113	113	A	35	8	8	121	0.0638884	1	0	90
Unigene16070_All	959	A	R	99	A	34	61	61	G	36	46	46	107	0.216685	1	0	39
Unigene16071_All	845	G	R	99	G	37	218	218	A	37	37	37	331	0.19175	1	0	351
Unigene16071_All	1196	C	Y	99	C	37	206	206	T	37	44	44	1077	0.347261	1	0	351
Unigene16072_All	120	C	Y	99	C	38	43	43	T	39	14	14	57	0.660015	1	0	57
Unigene16072_All	177	G	R	99	G	36	76	76	A	35	57	57	133	0.0979141	1	0	57
Unigene16072_All	620	T	K	99	T	38	36	36	G	37	28	28	64	0.0277486	1	0	44
Unigene16072_All	922	T	W	99	T	38	11	11	A	36	7	7	18	0.506693	1	0	258
Unigene16073_All	330	A	G	35	G	36	13	13	A	0	0	0	13	1	1	0	56
Unigene16073_All	748	T	Y	99	T	35	31	31	C	35	22	22	53	0.142744	1	0	109
Unigene16073_All	857	A	C	95	C	36	45	45	A	0	0	0	45	1	1	0	69
Unigene16073_All	926	T	C	67	C	36	28	28	T	0	0	0	28	1	1	0	11
Unigene16073_All	937	G	A	66	A	35	26	26	G	0	0	0	26	1	1	0	11
Unigene16073_All	967	A	C	55	C	35	23	23	A	0	0	0	23	1	1	0	30
Unigene16073_All	1108	A	W	99	A	34	53	53	T	36	14	14	68	0.147163	1	0	13
Unigene16073_All	1121	T	Y	99	T	35	55	55	C	32	13	13	68	0.164842	1	0	13
Unigene16073_All	1679	A	M	62	A	37	9	9	C	39	5	5	14	0.303197	1	0	558
Unigene16075_All	52	A	R	99	A	37	183	183	G	35	69	69	252	0.000131421	1	0	8
Unigene16075_All	60	A	W	99	A	38	224	224	T	38	31	31	258	0.0628088	1	0	8
Unigene16075_All	78	C	S	99	C	37	224	224	G	37	31	31	268	0.439084	1	0	15
Unigene16075_All	271	T	W	99	T	36	231	231	A	36	23	23	2683	0.448496	1	0	31
Unigene16075_All	359	G	K	99	G	33	163	163	T	32	92	92	2776	0.165425	1	0	52
Unigene16075_All	428	G	R	88	G	35	235	235	A	33	19	19	1537	0.427232	1	0	69
Unigene16075_All	518	G	R	99	G	34	219	219	A	33	35	35	1474	0.134023	1	0	63
Unigene16075_All	581	T	Y	73	T	29	236	236	C	32	18	18	1185	0.22347	1	0	18
Unigene16075_All	599	A	R	99	A	30	140	140	G	23	112	112	1052	6.07872e-07	1	0	18
Unigene16075_All	629	C	Y	99	C	35	215	215	T	35	39	39	1252	0.444888	1	0	27
Unigene16075_All	656	T	W	99	T	35	155	155	A	35	100	100	1273	0.285384	1	0	27
Unigene16075_All	971	C	Y	99	C	35	205	205	T	37	50	50	305	0.0380412	1	0	243
Unigene16075_All	1214	A	R	99	A	35	226	226	G	37	29	29	339	0.0560798	1	0	51
Unigene16075_All	1265	C	Y	99	C	34	161	161	T	35	93	93	271	0.483384	1	0	31
Unigene16075_All	1296	G	K	99	G	37	59	59	T	37	12	12	71	0.300954	1	0	13
Unigene16075_All	1309	T	W	99	A	38	40	40	T	37	25	25	65	0.0177108	1	0	13
Unigene16075_All	1335	T	Y	62	T	37	37	37	C	37	9	9	47	0.27436	1	0	16
Unigene16076_All	127	C	Y	99	C	35	222	222	T	36	33	33	300	0.465732	1	0	51
Unigene16076_All	178	C	S	99	C	30	232	232	G	34	23	23	316	0.0130109	1	0	51
Unigene16076_All	274	T	Y	99	T	34	150	150	C	32	105	105	421	0.0908929	1	0	96
Unigene16076_All	559	G	R	90	G	32	53	53	A	33	12	12	65	0.493255	1	0	104
Unigene16076_All	663	A	R	56	A	35	36	36	G	35	9	9	45	0.73057	1	0	13
Unigene16076_All	676	T	Y	99	T	32	30	30	C	31	10	10	40	0.481622	1	0	9
Unigene16076_All	685	A	W	99	A	33	21	21	T	37	15	15	37	0.0138949	1	0	9
Unigene16076_All	838	G	R	61	G	38	24	24	A	38	7	7	31	0.399766	1	0	153
Unigene16076_All	1268	T	Y	93	T	38	9	9	C	37	6	6	15	0.738661	1	0	190
Unigene16077_All	171	A	W	99	A	36	170	170	T	37	85	85	327	0.420771	1	0	63
Unigene16077_All	234	A	W	99	A	31	168	168	T	28	87	87	380	0.0247331	1	0	63
Unigene16077_All	600	A	R	99	A	32	95	95	G	32	38	38	134	0.442577	1	0	231
Unigene16077_All	831	C	Y	99	T	32	27	27	C	37	16	16	43	0.500124	1	0	116
Unigene16077_All	947	G	R	34	G	30	21	21	A	23	7	7	28	0.136059	1	0	116
Unigene16077_All	1077	A	R	79	G	36	5	5	A	35	5	5	10	0.710317	1	0	21
Unigene16078_All	165	C	Y	99	T	38	14	15	C	38	14	16	31	0.61361	1.09677	0	31
Unigene16078_All	196	T	W	99	T	33	24	24	A	35	14	14	38	0.526514	1	0	31
Unigene16078_All	266	A	R	99	A	34	42	42	G	35	17	17	59	0.67115	1	0	42
Unigene16078_All	308	T	Y	91	T	36	52	52	C	37	10	10	62	0.661003	1	0	30
Unigene16078_All	338	T	Y	99	T	37	89	89	C	36	27	27	116	0.390638	1	0	30
Unigene16078_All	646	C	Y	99	C	32	24	24	T	31	18	18	42	0.192278	1	0	10
Unigene16078_All	656	C	Y	77	C	35	39	39	T	36	11	11	50	0.686628	1	0	10
Unigene16078_All	803	G	R	50	G	36	81	81	A	35	10	10	91	0.28184	1	0	70
Unigene16079_All	100	A	R	35	A	38	236	236	G	37	10	10	246	0.113737	1	0	52
Unigene16079_All	185	C	S	99	C	34	232	232	G	34	21	21	330	0.402839	1	0	38
Unigene16079_All	223	G	S	93	G	33	243	243	C	35	11	11	404	0.271461	1	0	28
Unigene16079_All	287	G	K	99	G	35	229	229	T	35	24	24	476	0.320546	1	0	12
Unigene16079_All	299	T	Y	99	T	38	235	235	C	37	20	20	584	0.0128347	1	0	11
Unigene16079_All	310	T	Y	99	T	37	228	228	C	37	26	26	603	0.198984	1	0	11
Unigene16079_All	339	T	W	99	T	34	175	175	A	35	79	79	596	0.290596	1	0	9
Unigene16079_All	348	G	R	99	G	32	179	179	A	35	75	75	592	0.00521506	1	0	9
Unigene16079_All	388	C	Y	99	C	37	233	233	T	36	14	14	248	0.167326	1	0	40
Unigene16079_All	635	T	W	56	T	36	26	26	A	36	6	6	32	0.726607	1	0	21
Unigene16079_All	689	A	R	99	G	39	9	9	A	38	7	7	16	0.105245	1	0	26
Unigene16079_All	715	T	Y	87	T	34	19	19	C	34	8	8	28	0.118835	1	0	26
Unigene16079_All	1040	A	W	52	A	36	19	19	T	35	5	5	24	0.445299	1	0	17
Unigene1607_All	285	A	R	35	A	35	139	139	G	36	10	10	149	0.0825203	1	0	52
Unigene1607_All	337	T	Y	99	T	36	126	126	C	38	25	25	151	0.249569	1	0	52
Unigene1607_All	412	T	W	50	T	37	60	60	A	35	10	10	70	0.0336686	1	0	15
Unigene1607_All	427	C	Y	99	C	38	43	43	T	37	17	17	60	0.512569	1	0	15
Unigene1607_All	907	T	Y	41	T	35	16	16	C	37	5	5	22	0.103985	1	0	201
Unigene16080_All	353	C	Y	99	C	37	35	35	T	37	14	14	49	0.434865	1	0	56
Unigene16080_All	923	C	Y	99	C	36	101	101	T	34	48	48	149	0.0690756	1	0	221
Unigene16080_All	1211	A	W	99	A	36	149	149	T	33	75	75	224	1.60322e-05	1	0	59
Unigene16081_All	192	A	R	99	G	37	14	14	A	38	8	8	22	0.308171	1	0	75
Unigene16081_All	267	C	Y	99	C	36	14	14	T	30	11	11	25	0.514488	1	0	75
Unigene16081_All	762	T	Y	99	C	33	33	33	T	35	29	29	62	0.00958157	1	0	9
Unigene16081_All	771	C	Y	99	T	33	40	40	C	35	31	31	71	0.0171805	1	0	9
Unigene16082_All	367	G	R	99	G	37	157	157	A	36	98	98	495	0.142712	1	0	78
Unigene16082_All	484	G	R	99	G	36	144	144	A	35	22	22	166	0.329774	1	0	36
Unigene16082_All	565	G	R	99	G	36	170	170	A	38	37	37	207	0.0260195	1	0	9
Unigene16082_All	574	T	W	51	T	36	203	203	A	37	10	10	213	0.459185	1	0	9
Unigene16082_All	649	G	R	99	G	34	144	144	A	33	66	66	210	0.0959362	1	0	15
Unigene16082_All	664	C	Y	99	C	35	161	161	T	31	76	76	237	0.000234794	1	0	15
Unigene16082_All	688	G	R	99	G	36	180	180	A	37	67	67	247	0.398438	1	0	6
Unigene16082_All	694	T	Y	99	T	36	179	179	C	37	66	66	245	0.0171151	1	0	6
Unigene16082_All	724	T	W	99	T	35	156	156	A	37	38	38	198	0.157388	1	0	30
Unigene16082_All	907	G	R	99	G	35	55	55	A	34	18	18	73	0.148457	1	0	42
Unigene16082_All	949	T	Y	99	C	36	68	68	T	37	22	22	90	0.387303	1	0	42
Unigene16082_All	997	G	R	32	G	34	163	163	A	35	15	15	178	0.357958	1	0	48
Unigene16082_All	1060	C	Y	99	C	31	136	136	T	35	31	31	167	0.00964181	1	0	9
Unigene16082_All	1069	C	S	99	C	32	138	138	G	31	16	16	154	0.379074	1	0	9
Unigene16083_All	135	A	M	99	A	37	88	88	C	35	36	36	124	0.347957	1	0	40
Unigene16083_All	175	A	R	99	G	33	147	147	A	35	98	98	246	0.0108237	1	0	40
Unigene16083_All	283	C	Y	99	T	36	138	138	C	33	116	116	687	2.39184e-05	1	0	27
Unigene16083_All	310	G	S	99	G	34	198	198	C	34	56	56	1051	0.148846	1	0	27
Unigene16083_All	358	T	K	99	T	36	140	140	G	37	115	115	949	0.103354	1	0	48
Unigene16083_All	715	G	K	47	G	36	144	144	T	36	8	8	152	0.407042	1	0	87
Unigene16083_All	802	T	W	99	T	33	76	76	A	36	20	20	96	0.0923912	1	0	42
Unigene16083_All	844	C	Y	99	C	35	75	75	T	38	19	19	95	0.000299871	1	0	42
Unigene16083_All	922	G	R	99	G	34	80	80	A	33	14	14	94	0.200743	1	0	57
Unigene16083_All	979	C	Y	99	T	31	70	70	C	33	36	36	106	0.144411	1	0	21
Unigene16083_All	1000	A	R	99	A	31	43	43	G	31	20	20	63	0.699448	1	0	15
Unigene16083_All	1015	C	Y	99	C	32	54	54	T	36	14	14	68	0.0275143	1	0	15
Unigene16083_All	1060	C	Y	99	C	37	75	75	T	36	19	19	95	0.180554	1	0	45
Unigene16083_All	1153	A	R	99	G	34	18	18	A	30	11	11	29	0.0460985	1	0	18
Unigene16083_All	1201	G	K	99	G	34	34	34	T	37	9	9	43	0.563823	1	0	36
Unigene16083_All	1237	G	R	99	A	36	17	17	G	37	11	11	28	0.75	1	0	27
Unigene16083_All	1264	C	Y	61	T	37	8	8	C	38	5	5	13	0.416472	1	0	27
Unigene16085_All	72	T	W	99	T	39	188	188	A	38	67	67	1126	0.0673248	1	0	58
Unigene16085_All	373	G	S	99	G	34	173	173	C	36	82	82	391	8.46508e-05	1	0	51
Unigene16085_All	424	G	R	99	G	36	190	190	A	37	65	65	362	0.362549	1	0	51
Unigene16085_All	712	C	Y	99	C	34	179	179	T	33	19	19	198	0.135882	1	0	51
Unigene16085_All	763	T	K	99	T	30	171	171	G	30	19	19	192	0.342091	1	0	51
Unigene16085_All	856	C	Y	99	C	36	169	169	T	35	45	45	215	0.0531974	1	0	93
Unigene16085_All	961	G	R	99	G	32	101	101	A	34	36	36	138	0.351436	1	0	100
Unigene16085_All	1061	T	Y	99	T	37	51	51	C	36	24	24	75	0.0264032	1	0	47
Unigene16085_All	1108	A	M	99	A	33	43	43	C	27	25	25	68	0.0380037	1	0	36
Unigene16085_All	1368	G	R	99	G	37	30	30	A	37	13	13	43	0.716323	1	0	18
Unigene16086_All	304	T	Y	99	T	35	27	27	C	33	15	15	42	0.550217	1	0	475
Unigene16087_All	221	G	K	73	G	37	69	69	T	34	12	12	81	0.0342782	1	0	145
Unigene16087_All	388	A	R	99	A	33	100	100	G	35	17	17	119	0.0287961	1	0	39
Unigene16087_All	427	A	R	99	G	35	109	109	A	38	80	80	189	0.000212421	1	0	39
Unigene16087_All	790	A	W	99	T	34	58	58	A	35	30	30	100	0.239278	1	0	42
Unigene16087_All	859	A	R	99	G	33	58	58	A	32	25	25	83	0.277399	1	0	36
Unigene16087_All	994	T	W	99	A	35	99	99	T	35	52	52	151	0.0383585	1	0	15
Unigene16087_All	1009	A	R	99	A	36	127	127	G	36	36	36	163	0.340884	1	0	15
Unigene16087_All	1540	C	Y	62	C	40	5	5	T	38	5	5	10	0.672619	1	0	20
Unigene16088_All	557	T	Y	93	T	39	7	7	C	37	7	7	14	0.52433	1	0	495
Unigene16089_All	711	A	R	99	A	37	184	184	G	38	31	31	215	0.288739	1	0	339
Unigene1608_All	391	C	Y	99	C	37	94	94	T	37	14	14	108	0.320441	1	0	44
Unigene1608_All	435	A	R	49	A	36	135	135	G	35	10	10	147	0.306015	1	0	44
Unigene1608_All	532	A	R	99	A	33	217	217	G	32	34	34	251	0.0674454	1	0	90
Unigene1608_All	622	A	M	99	A	34	233	233	C	35	22	22	406	0.0596927	1	0	90
Unigene1608_All	1021	T	W	99	T	39	11	11	A	39	7	7	18	0.3295	1	0	23
Unigene16090_All	310	C	M	68	C	34	18	18	A	37	6	6	24	0.743525	1	0	37
Unigene16090_All	347	C	Y	37	C	33	38	38	T	29	8	8	46	0.0906751	1	0	37
Unigene16090_All	542	A	R	99	A	35	119	119	G	35	16	16	136	0.486424	1	0	93
Unigene16090_All	635	C	Y	99	C	35	186	186	T	35	63	63	249	0.483049	1	0	93
Unigene16090_All	782	G	R	35	G	35	88	88	A	37	8	8	96	0.105156	1	0	24
Unigene16090_All	806	G	R	29	G	35	50	50	A	38	7	7	57	0.0989464	1	0	24
Unigene16091_All	126	T	W	99	T	35	53	53	A	37	19	19	72	0.00952625	1	0	79
Unigene16091_All	205	C	M	99	C	37	60	60	A	35	26	26	86	0.00472626	1	0	5
Unigene16091_All	210	T	Y	99	T	37	60	60	C	37	26	26	86	0.372816	1	0	5
Unigene16091_All	405	G	K	99	G	33	44	44	T	36	14	14	58	0.537517	1	0	195
Unigene16091_All	1318	C	M	98	C	36	36	36	A	36	9	9	45	0.181338	1	0	42
Unigene16092_All	883	A	W	99	A	36	11	11	T	35	6	6	17	0.683137	1	0	16
Unigene16092_All	899	A	W	91	A	35	12	12	T	37	6	6	18	0.218541	1	0	16
Unigene16092_All	983	A	M	99	A	35	26	26	C	36	15	15	41	0.420526	1	0	68
Unigene16092_All	1303	A	M	99	A	34	51	51	C	34	21	21	73	0.352766	1	0	108
Unigene16092_All	1411	C	Y	99	C	33	92	92	T	33	34	34	126	0.147548	1	0	33
Unigene16092_All	1444	C	Y	99	C	34	92	92	T	33	34	34	126	0.5	1	0	33
Unigene16092_All	1502	A	W	99	A	36	102	102	T	37	34	34	136	0.184839	1	0	58
Unigene16092_All	1570	T	Y	99	T	32	26	26	C	33	16	16	42	0.580634	1	0	68
Unigene16093_All	146	T	W	99	A	36	11	11	T	39	9	9	22	0.0402	1	0	181
Unigene16093_All	327	T	Y	99	T	37	107	107	C	38	24	24	131	0.379644	1	0	69
Unigene16093_All	396	G	R	99	A	37	47	47	G	38	24	24	71	0.0792657	1	0	42
Unigene16093_All	438	T	Y	52	T	33	57	57	C	33	10	10	67	0.426712	1	0	42
Unigene16093_All	528	G	R	77	G	37	144	144	A	38	13	13	157	0.381115	1	0	15
Unigene16093_All	543	C	Y	99	T	37	93	93	C	37	61	61	155	0.303804	1	0	15
Unigene16093_All	633	A	W	99	T	36	87	87	A	32	88	88	176	0.00218639	1	0	15
Unigene16093_All	648	T	Y	99	C	36	115	115	T	36	62	62	177	0.347509	1	0	15
Unigene16093_All	880	A	R	21	A	35	240	240	G	34	15	15	403	0.276394	1	0	41
Unigene16093_All	1077	T	W	99	T	34	224	224	A	35	24	24	310	0.395514	1	0	6
Unigene16093_All	1083	C	Y	99	T	33	131	131	C	35	123	123	313	0.0935314	1	0	6
Unigene16093_All	1136	A	R	99	A	36	232	232	G	36	23	23	366	0.23798	1	0	53
Unigene16093_All	1197	T	Y	99	C	33	168	168	T	33	87	87	269	0.345475	1	0	24
Unigene16093_All	1221	G	R	99	G	32	239	239	A	33	16	16	343	0.15166	1	0	24
Unigene16093_All	1257	T	K	99	G	28	190	190	T	31	65	65	393	0.00559712	1	0	36
Unigene16094_All	92	T	W	88	T	38	77	77	A	38	10	10	87	0.344861	1	0	198
Unigene16094_All	290	A	R	99	A	37	197	197	G	37	20	20	217	0.188857	1	0	198
Unigene16094_All	749	G	R	94	G	38	6	6	A	37	6	6	12	0.674784	1	0	459
Unigene16095_All	438	G	R	99	G	36	152	152	A	36	85	85	237	0.166034	1	0	322
Unigene16095_All	1334	T	K	46	T	37	27	27	G	39	6	6	33	0.650094	1	0	291
Unigene16096_All	50	T	Y	99	T	36	44	44	C	36	15	15	59	0.173261	1	0	26
Unigene16096_All	76	A	W	99	A	37	57	57	T	38	19	19	76	0.250866	1	0	26
Unigene16096_All	311	C	Y	99	C	36	139	139	T	35	30	30	169	0.0269549	1	0	99
Unigene16096_All	449	G	R	99	G	35	142	142	A	36	39	39	181	0.348942	1	0	138
Unigene16096_All	1108	C	Y	99	C	32	186	186	T	32	68	68	1036	0.131621	1	0	118
Unigene16096_All	1226	A	R	99	A	31	174	174	G	31	81	81	1182	0.143635	1	0	87
Unigene16096_All	1370	A	W	99	A	39	213	213	T	39	37	37	250	0.351775	1	0	19
Unigene16096_All	1413	C	Y	41	C	36	56	56	T	37	8	8	64	0.167461	1	0	43
Unigene16097_All	147	A	R	99	A	36	101	101	G	37	16	16	118	0.415201	1	0	10
Unigene16097_All	157	A	R	99	A	36	104	104	G	37	28	28	132	0.17774	1	0	10
Unigene16097_All	659	G	K	90	G	36	101	101	T	34	12	12	113	0.0756174	1	0	423
Unigene16097_All	1082	A	R	74	A	38	102	102	G	37	23	23	126	0.199272	1	0	128
Unigene16098_All	1161	T	Y	99	C	33	32	32	T	36	12	12	44	0.111872	1	0	15
Unigene16098_All	1176	T	K	99	G	35	31	31	T	36	15	15	46	0.228846	1	0	15
Unigene16098_All	1530	T	W	99	A	36	22	22	T	37	15	15	37	0.517499	1	0	226
Unigene16099_All	19	G	R	99	G	35	31	31	A	37	21	21	52	0.00304268	1	0	226
Unigene160_All	2556	T	Y	99	C	34	8	8	T	33	8	8	16	0.595571	1	0	6
Unigene160_All	2769	C	M	99	A	35	7	7	C	40	6	6	14	0.025641	1	0	80
Unigene160_All	3051	T	Y	99	T	34	21	21	C	33	17	17	38	0.11586	1	0	57
Unigene160_All	3108	C	Y	99	C	35	20	20	T	36	16	16	36	0.565502	1	0	54
Unigene160_All	3162	A	R	99	A	36	18	18	G	37	13	13	31	0.112878	1	0	54
Unigene160_All	3348	G	R	99	G	33	44	44	A	34	30	30	74	0.227032	1	0	36
Unigene160_All	3436	A	M	99	C	36	44	44	A	36	41	41	85	0.333255	1	0	11
Unigene160_All	3447	C	Y	99	T	37	50	50	C	35	46	46	96	0.176768	1	0	11
Unigene160_All	3489	A	W	85	A	36	32	32	T	35	7	7	39	0.599516	1	0	42
Unigene160_All	3609	T	W	22	T	36	83	83	A	30	9	9	92	0.35399	1	0	33
Unigene160_All	3642	C	Y	74	C	33	102	102	T	27	13	13	115	0.00569425	1	0	33
Unigene160_All	3834	C	Y	99	C	32	159	159	T	34	14	14	173	0.125194	1	0	78
Unigene160_All	3912	G	R	99	G	36	132	132	A	34	94	94	226	0.0441036	1	0	63
Unigene160_All	3975	T	Y	99	T	36	184	184	C	36	71	71	450	0.361587	1	0	9
Unigene160_All	3984	A	R	99	A	37	177	177	G	38	78	78	439	0.0438077	1	0	9
Unigene160_All	4044	G	R	52	G	32	245	245	A	32	10	10	352	0.454727	1	0	60
Unigene16100_All	620	T	W	20	T	35	49	49	A	37	6	6	55	0.576731	1	0	44
Unigene16101_All	694	C	Y	49	C	36	242	242	T	33	12	12	390	0.362332	1	0	24
Unigene16101_All	718	T	Y	78	T	37	242	242	C	37	13	13	345	0.283249	1	0	24
Unigene16101_All	1016	A	W	73	A	35	216	216	T	39	9	9	226	0.0108114	1	0	269
Unigene16101_All	1285	A	R	99	A	33	25	25	G	36	18	18	43	0.529691	1	0	6
Unigene16101_All	1402	A	R	52	A	37	28	28	G	38	7	7	35	0.15994	1	0	111
Unigene16102_All	18	C	T	55	T	33	23	23	A	2	1	1	24	1	1	0	9
Unigene16102_All	70	G	R	99	G	34	74	74	A	30	18	18	92	0.0811155	1	0	52
Unigene16102_All	353	T	W	89	T	33	242	242	A	32	12	12	361	0.0448712	1	0	24
Unigene16102_All	541	G	K	99	G	36	192	192	T	36	63	63	438	0.409303	1	0	110
Unigene16102_All	1196	G	R	99	G	37	87	87	A	35	14	14	101	0.119127	1	0	111
Unigene16102_All	1307	T	K	99	T	33	33	33	G	35	13	13	46	0.6029	1	0	111
Unigene16103_All	251	T	Y	99	T	33	15	15	C	32	13	13	28	0.293019	1	0	21
Unigene16103_All	272	G	K	99	G	31	19	19	T	33	15	15	34	0.696063	1	0	21
Unigene16103_All	371	A	R	65	A	36	18	18	G	28	9	9	27	0.0335991	1	0	99
Unigene16103_All	601	A	R	99	A	34	33	33	G	38	14	14	47	0.501039	1	0	45
Unigene16103_All	646	A	R	99	A	35	32	32	G	36	20	20	53	0.242033	1	0	45
Unigene16103_All	725	A	R	99	A	35	51	51	G	33	15	15	66	0.348203	1	0	31
Unigene16103_All	806	A	M	99	A	34	51	51	C	37	41	41	92	0.0199778	1	0	68
Unigene16103_All	874	G	R	99	A	35	100	100	G	34	80	80	180	0.357331	1	0	64
Unigene16103_All	938	C	M	99	A	32	97	97	C	34	91	91	188	0.114775	1	0	64
Unigene16103_All	1134	G	S	99	G	27	122	122	C	24	21	21	145	0.308879	1	0	152
Unigene16103_All	1286	G	R	99	A	31	224	224	G	33	30	30	382	0.0168501	1	0	81
Unigene16103_All	1367	A	M	99	A	35	98	98	C	35	69	69	167	0.183122	1	0	21
Unigene16103_All	1388	C	S	99	G	36	33	33	C	36	28	28	61	0.683905	1	0	21
Unigene16103_All	1505	A	W	99	A	38	10	10	T	39	9	9	19	0.33036	1	0	117
Unigene16105_All	72	A	R	97	G	36	17	17	A	37	7	7	24	0.528464	1	0	9
Unigene16105_All	81	G	K	99	T	39	15	15	G	36	9	9	24	0.565778	1	0	9
Unigene16105_All	151	C	M	99	A	31	15	15	C	33	12	12	27	0.520805	1	0	20
Unigene16105_All	222	G	R	99	G	33	75	75	A	32	19	19	96	0.0455143	1	0	71
Unigene16105_All	432	A	M	99	A	36	84	84	C	31	19	19	103	0.000998373	1	0	19
Unigene16105_All	602	C	S	97	C	35	28	28	G	34	8	8	36	0.0246151	1	0	36
Unigene16105_All	638	C	Y	99	C	35	26	26	T	35	15	15	41	0.473355	1	0	36
Unigene16105_All	894	C	S	69	C	35	36	36	G	37	7	7	43	0.117776	1	0	80
Unigene16105_All	1079	T	Y	99	T	34	16	16	C	35	13	13	30	0.224384	1	0	160
Unigene16105_All	1275	T	W	99	T	36	8	8	A	34	8	8	16	0.220901	1	0	36
Unigene16106_All	183	C	Y	99	C	35	194	194	T	36	61	61	1048	0.180746	1	0	249
Unigene16106_All	432	G	R	99	G	35	239	239	A	34	16	16	347	0.0849611	1	0	10
Unigene16106_All	442	G	R	96	G	35	241	241	A	38	14	14	321	0.0372501	1	0	10
Unigene16106_All	1301	C	Y	35	C	38	18	18	T	37	5	5	23	0.519897	1	0	452
Unigene16107_All	141	A	M	84	A	38	5	5	C	31	6	6	11	0.607143	1	0	22
Unigene16107_All	786	C	Y	99	C	35	68	68	T	36	19	19	87	0.0426426	1	0	64
Unigene16107_All	850	C	Y	99	C	37	59	59	T	38	17	17	76	0.34499	1	0	41
Unigene16107_All	891	C	Y	99	C	36	92	92	T	34	17	17	109	0.0306874	1	0	41
Unigene16107_All	1024	G	K	99	G	34	222	222	T	35	33	33	260	0.0127976	1	0	92
Unigene16107_All	1116	C	Y	99	C	36	220	220	T	34	35	35	534	0.00114108	1	0	72
Unigene16107_All	1188	C	Y	99	C	35	222	222	T	34	33	33	349	0.222836	1	0	72
Unigene16107_All	1290	G	R	99	G	37	171	171	A	35	29	29	200	0.0249746	1	0	102
Unigene16107_All	1476	T	W	99	T	31	52	52	A	33	13	13	67	0.294184	1	0	24
Unigene16107_All	1500	A	R	91	A	34	44	44	G	33	11	11	55	0.199694	1	0	24
Unigene16107_All	1668	T	W	95	T	33	24	24	A	35	8	8	32	0.525887	1	0	165
Unigene16108_All	94	T	C	54	C	38	21	21	T	0	0	0	21	1	1	0	15
Unigene16108_All	116	G	T	60	T	33	28	28	G	0	0	0	28	1	1	0	22
Unigene16108_All	158	C	M	99	A	19	28	28	C	25	19	19	50	0.120016	1	0	20
Unigene16108_All	189	T	Y	99	C	30	56	56	T	32	38	38	94	0.241618	1	0	13
Unigene16108_All	202	T	Y	99	T	32	84	84	C	32	30	30	115	0.359291	1	0	13
Unigene16108_All	271	A	W	99	A	35	56	56	T	36	21	21	77	0.418443	1	0	69
Unigene16108_All	460	T	Y	84	T	38	18	18	C	37	7	7	25	0.64344	1	0	18
Unigene16108_All	478	G	R	71	G	35	21	21	A	34	7	7	28	0.568029	1	0	18
Unigene16108_All	632	G	R	99	A	36	28	28	G	34	10	10	38	0.631014	1	0	50
Unigene16108_All	688	T	K	99	G	34	20	20	T	38	6	6	26	0.549068	1	0	48
Unigene16108_All	736	T	W	64	T	37	19	19	A	40	6	6	25	0.0180407	1	0	48
Unigene16108_All	905	G	R	66	A	37	15	15	G	31	5	5	20	0.254837	1	0	43
Unigene16108_All	1078	G	S	99	C	33	11	11	G	33	8	8	19	0.483925	1	0	7
Unigene16108_All	1085	A	M	84	C	37	12	12	A	36	5	5	17	0.323045	1	0	7
Unigene16108_All	1352	C	Y	59	C	35	12	12	T	36	6	6	18	0.375135	1	0	15
Unigene16108_All	1367	G	K	99	T	33	14	14	G	37	6	6	20	0.137023	1	0	15
Unigene16109_All	109	C	M	99	C	36	230	230	A	36	25	25	304	0.408552	1	0	45
Unigene16109_All	340	T	Y	92	T	31	220	220	C	32	31	31	1189	0.057491	1	0	231
Unigene16109_All	702	C	Y	63	C	37	242	242	T	34	13	13	293	0.262093	1	0	362
Unigene16109_All	1320	C	T	31	T	35	12	12	C	0	0	0	12	1	1	0	14
Unigene16109_All	1357	A	G	38	G	39	14	14	A	0	0	0	14	1	1	0	11
Unigene16109_All	1368	A	G	39	G	38	15	15	A	0	0	0	15	1	1	0	7
Unigene16109_All	1375	G	C	40	C	37	15	15	G	0	0	0	15	1	1	0	7
Unigene16109_All	1761	T	Y	86	T	34	15	15	C	35	7	7	22	0.418297	1	0	292
Unigene16109_All	2053	A	M	23	A	34	31	31	C	35	5	5	36	0.697557	1	0	135
Unigene1610_All	515	G	R	99	G	30	36	36	A	29	21	21	57	0.399662	1	0	583
Unigene16110_All	666	A	W	99	A	35	81	81	T	33	13	13	94	0.194957	1	0	159
Unigene16110_All	1312	T	W	83	T	31	236	236	A	31	13	13	758	0.466114	1	0	49
Unigene16110_All	1361	A	M	66	A	36	241	241	C	32	14	14	896	0.261941	1	0	49
Unigene16110_All	1430	G	K	40	G	34	243	243	T	32	12	12	523	0.0793739	1	0	69
Unigene16111_All	284	T	Y	99	T	38	10	10	C	38	9	9	19	0.274481	1	0	120
Unigene16111_All	404	G	R	99	G	35	29	29	A	36	13	13	42	0.702258	1	0	67
Unigene16111_All	471	T	Y	99	T	36	41	41	C	38	16	16	58	0.627316	1	0	17
Unigene16111_All	488	A	W	99	A	37	33	33	T	36	13	13	46	0.528398	1	0	17
Unigene16111_All	684	G	R	22	G	36	134	134	A	33	10	10	146	0.0344325	1	0	7
Unigene16111_All	728	A	R	99	A	36	148	148	G	35	40	40	188	0.03688	1	0	19
Unigene16111_All	838	A	W	99	A	36	199	199	T	37	55	55	254	0.00758873	1	0	13
Unigene16111_All	851	G	R	99	G	35	219	219	A	35	22	22	241	0.314611	1	0	12
Unigene16111_All	863	A	R	99	A	36	176	176	G	33	41	41	217	0.000211292	1	0	12
Unigene16111_All	991	T	Y	99	T	35	96	96	C	31	45	45	141	0.0948644	1	0	31
Unigene16111_All	1022	A	R	99	A	29	147	147	G	36	14	14	163	0.000699946	1	0	31
Unigene16111_All	1374	A	R	99	A	35	70	70	G	35	21	21	91	0.317146	1	0	53
Unigene16111_All	1427	C	Y	99	C	35	140	140	T	35	25	25	165	0.386449	1	0	53
Unigene16111_All	1525	A	R	99	A	33	43	43	G	37	26	26	71	0.00145039	1	0	98
Unigene16111_All	1711	T	Y	99	T	37	43	43	C	36	16	16	59	0.0130989	1	0	7
Unigene16111_All	1718	G	K	47	G	35	53	53	T	34	8	8	61	0.267756	1	0	7
Unigene16111_All	1799	A	R	46	A	38	56	56	G	37	9	9	65	0.406166	1	0	27
Unigene16111_All	1826	A	M	89	A	39	43	43	C	36	13	13	56	0.0147972	1	0	27
Unigene16113_All	82	G	R	35	G	38	182	182	A	38	16	16	198	0.447505	1	0	203
Unigene16113_All	285	G	K	35	G	34	195	195	T	36	8	8	204	0.400611	1	0	203
Unigene16113_All	1276	A	R	99	A	37	18	18	G	36	14	14	32	0.293369	1	0	27
Unigene16113_All	1303	A	M	99	A	37	18	18	C	36	11	11	29	0.637519	1	0	27
Unigene16114_All	47	T	Y	86	T	37	242	242	C	38	12	12	1097	0.196716	1	0	12
Unigene16114_All	133	C	Y	99	C	34	140	140	T	33	115	115	2366	0.029683	1	0	86
Unigene16114_All	259	A	W	99	A	27	173	173	T	26	78	78	3618	0.308316	1	0	27
Unigene16114_All	286	G	R	99	G	33	223	223	A	35	32	32	3434	0.0729061	1	0	27
Unigene16114_All	346	G	K	99	G	26	233	233	T	29	20	20	1960	0.205685	1	0	60
Unigene16114_All	503	A	W	99	A	28	170	170	T	28	84	84	681	0.459154	1	0	31
Unigene16114_All	534	A	R	99	A	32	227	227	G	32	28	28	502	0.0402718	1	0	31
Unigene16114_All	719	A	R	99	A	35	171	171	G	35	81	81	376	0.0590557	1	0	69
Unigene16114_All	788	C	Y	99	C	36	192	192	T	33	63	63	461	0.0042569	1	0	69
Unigene16114_All	1049	G	R	99	G	36	111	111	A	36	66	66	177	0.1685	1	0	60
Unigene16114_All	1192	T	K	99	T	34	133	133	G	36	65	65	198	0.105549	1	0	76
Unigene16114_All	1341	T	Y	99	T	36	84	84	C	37	35	35	119	0.128325	1	0	15
Unigene16114_All	1356	C	M	99	C	36	105	105	A	35	13	13	118	0.207097	1	0	5
Unigene16114_All	1361	G	R	99	G	35	99	99	A	36	15	15	114	0.4252	1	0	5
Unigene16114_All	1390	T	W	69	T	33	62	62	A	36	8	8	70	0.11155	1	0	29
Unigene16114_All	1484	C	Y	31	C	37	51	51	T	36	8	8	59	0.368141	1	0	34
Unigene16114_All	1518	G	R	99	G	35	24	24	A	33	20	20	44	0.503913	1	0	34
Unigene16114_All	1813	G	K	86	G	37	39	39	T	37	8	8	47	0.472343	1	0	226
Unigene16115_All	38	C	Y	99	C	35	136	136	T	36	119	119	330	0.000276262	1	0	5
Unigene16115_All	43	T	Y	99	T	36	232	232	C	36	23	23	356	0.44988	1	0	5
Unigene16115_All	139	A	M	99	A	37	167	167	C	36	88	88	813	0.0601181	1	0	39
Unigene16115_All	178	G	R	99	G	37	165	165	A	36	90	90	749	0.00112541	1	0	39
Unigene16115_All	950	A	R	99	A	36	160	160	G	36	95	95	583	0.370313	1	0	129
Unigene16115_All	1079	G	R	99	G	36	157	157	A	36	98	98	315	0.259482	1	0	81
Unigene16115_All	1160	A	R	99	A	35	143	143	G	35	112	112	258	0.302102	1	0	81
Unigene16115_All	1247	A	W	99	A	36	148	148	T	37	103	103	251	0.296142	1	0	87
Unigene16116_All	372	G	R	32	G	37	244	244	A	38	11	11	1392	0.187819	1	0	336
Unigene16116_All	1338	C	Y	35	C	36	148	148	T	37	11	11	159	0.129217	1	0	404
Unigene16117_All	491	C	Y	78	C	37	38	38	T	38	9	9	47	0.726213	1	0	6
Unigene16117_All	497	G	R	23	G	37	40	40	A	34	7	7	47	0.520088	1	0	6
Unigene16117_All	745	A	R	99	G	35	10	10	A	30	9	9	19	0.5391	1	0	156
Unigene16117_All	1627	G	R	79	G	33	26	26	A	37	9	9	35	0.545917	1	0	411
Unigene16118_All	326	C	S	99	C	35	151	151	G	36	60	60	211	0.407607	1	0	785
Unigene16119_All	886	G	K	99	G	35	62	62	T	35	26	26	89	0.44725	1	0	792
Unigene16119_All	1894	A	W	99	A	36	173	173	T	36	82	82	791	0.193947	1	0	40
Unigene16119_All	1934	G	R	51	G	36	241	241	A	35	14	14	1347	0.367937	1	0	40
Unigene16119_All	1990	T	Y	99	T	33	164	164	C	32	91	91	1257	0.249764	1	0	56
Unigene16119_All	2396	C	Y	99	C	35	189	189	T	37	66	66	1339	0.00522205	1	0	366
Unigene16119_All	2762	T	W	99	T	34	234	234	A	30	20	20	647	0.00111254	1	0	119
Unigene16119_All	2881	T	W	99	T	36	175	175	A	36	80	80	288	0.416667	1	0	119
Unigene16120_All	97	T	W	99	T	38	79	79	A	37	15	15	94	0.0638961	1	0	452
Unigene16120_All	609	A	W	99	A	38	109	109	T	38	17	17	126	0.19972	1	0	211
Unigene16120_All	820	A	R	99	A	36	232	232	G	34	22	22	367	0.228919	1	0	198
Unigene16120_All	1018	A	R	82	A	31	106	106	G	31	15	15	124	0.442155	1	0	198
Unigene16120_All	1424	T	W	99	T	35	146	146	A	36	21	21	167	0.453889	1	0	401
Unigene16120_All	1838	G	R	99	G	34	217	217	A	35	37	37	365	0.305161	1	0	9
Unigene16120_All	2158	T	Y	99	T	35	231	231	C	35	24	24	1162	0.377851	1	0	48
Unigene16120_All	2341	A	R	99	A	31	233	233	G	28	22	22	1488	0.243839	1	0	48
Unigene16120_All	2389	G	R	99	G	32	224	224	A	32	31	31	1556	0.158271	1	0	48
Unigene16120_All	2590	C	Y	99	C	36	235	235	T	36	20	20	906	0.382685	1	0	51
Unigene16121_All	182	G	R	99	G	31	234	234	A	35	21	21	793	0.0010376	1	0	30
Unigene16121_All	212	A	R	99	A	31	204	204	G	29	51	51	715	0.0803016	1	0	30
Unigene16121_All	281	G	R	99	G	37	153	153	A	37	102	102	563	0.174445	1	0	15
Unigene16121_All	296	G	R	99	G	37	166	166	A	38	89	89	543	0.170983	1	0	15
Unigene16121_All	364	G	K	99	G	34	144	144	T	33	56	56	200	0.406965	1	0	68
Unigene16121_All	482	A	R	99	A	35	115	115	G	36	67	67	183	0.134755	1	0	21
Unigene16121_All	503	A	R	99	A	36	58	58	G	36	46	46	104	0.356991	1	0	21
Unigene16121_All	695	C	Y	58	C	35	166	166	T	36	10	10	176	0.394192	1	0	38
Unigene16121_All	733	A	W	99	A	36	120	120	T	36	71	71	193	0.0171447	1	0	38
Unigene16121_All	779	G	R	99	G	35	118	118	A	35	39	39	157	0.05101	1	0	46
Unigene16121_All	980	T	Y	99	T	34	56	56	C	35	35	35	91	0.05492	1	0	33
Unigene16121_All	1013	C	Y	99	C	38	53	53	T	38	25	25	78	0.311175	1	0	31
Unigene16121_All	1044	A	W	99	A	35	52	52	T	36	30	30	82	0.112565	1	0	31
Unigene16121_All	1277	A	R	99	A	36	93	93	G	36	81	81	174	0.0865652	1	0	18
Unigene16121_All	1295	G	R	99	G	36	154	154	A	36	18	18	172	0.429526	1	0	18
Unigene16121_All	1397	C	Y	99	C	37	95	95	T	36	85	85	180	0.176606	1	0	48
Unigene16121_All	1445	T	W	99	T	35	146	146	A	34	73	73	220	0.234557	1	0	48
Unigene16121_All	1559	C	Y	99	C	36	212	212	T	35	43	43	482	0.0504385	1	0	18
Unigene16121_All	1577	G	R	99	G	37	217	217	A	35	38	38	787	0.000879722	1	0	15
Unigene16121_All	1592	A	R	99	A	34	206	206	G	34	49	49	844	0.39051	1	0	15
Unigene16121_All	1610	G	R	99	G	30	201	201	A	29	54	54	747	0.0948767	1	0	18
Unigene16121_All	1632	A	M	99	A	36	177	177	C	36	78	78	772	0.428711	1	0	22
Unigene16121_All	1661	G	S	95	G	29	229	229	C	33	18	18	756	0.0755622	1	0	17
Unigene16121_All	1736	A	W	63	A	30	231	231	T	20	24	24	605	0.00691939	1	0	22
Unigene16121_All	1758	C	Y	99	C	30	160	160	T	30	95	95	687	0.0868995	1	0	22
Unigene16121_All	1781	T	Y	99	T	36	166	166	C	34	87	87	606	0.0936644	1	0	6
Unigene16121_All	1787	C	Y	99	C	35	173	173	T	35	81	81	741	0.181932	1	0	6
Unigene16121_All	1823	A	R	99	A	35	225	225	G	37	28	28	824	0.0800374	1	0	18
Unigene16121_All	1841	T	K	99	T	34	197	197	G	36	57	57	799	0.000143096	1	0	18
Unigene16121_All	1876	C	Y	23	C	33	245	245	T	31	10	10	502	0.120547	1	0	10
Unigene16121_All	1886	A	W	99	A	35	198	198	T	33	55	55	493	0.0310766	1	0	10
Unigene16121_All	2030	C	Y	99	C	36	178	178	T	36	77	77	706	0.162823	1	0	75
Unigene16121_All	2105	A	W	99	A	35	160	160	T	37	93	93	763	0.20292	1	0	10
Unigene16121_All	2115	A	W	99	A	35	172	172	T	38	82	82	881	0.000221155	1	0	10
Unigene16121_All	2154	G	R	99	G	35	198	198	A	33	57	57	1046	0.00581755	1	0	35
Unigene16121_All	2189	G	K	99	G	35	140	140	T	34	115	115	1214	0.179982	1	0	35
Unigene16121_All	2267	T	Y	99	T	35	168	168	C	38	87	87	661	1.02432e-07	1	0	78
Unigene16121_All	2346	A	W	99	A	37	164	164	T	36	90	90	369	0.000253196	1	0	15
Unigene16121_All	2361	T	W	99	T	36	145	145	A	37	20	20	165	0.409176	1	0	15
Unigene16122_All	1146	C	M	99	C	37	117	117	A	37	22	22	139	0.392002	1	0	205
Unigene16122_All	1351	T	Y	62	T	37	60	60	C	38	9	9	69	0.0966855	1	0	68
Unigene16122_All	1419	A	R	99	A	34	40	40	G	35	11	11	51	0.70316	1	0	60
Unigene16122_All	1479	G	R	99	G	33	50	50	A	34	21	21	71	0.182173	1	0	60
Unigene16122_All	1819	T	Y	99	C	32	12	12	T	31	9	9	21	0.403902	1	0	340
Unigene16123_All	651	A	M	30	A	35	27	27	C	38	5	5	32	0.091565	1	0	21
Unigene16123_All	672	G	R	34	G	33	40	40	A	35	7	7	47	0.264357	1	0	21
Unigene16123_All	734	T	Y	59	T	36	49	49	C	36	9	9	58	0.222952	1	0	61
Unigene16123_All	795	T	Y	30	T	35	51	51	C	34	10	10	61	0.0544173	1	0	14
Unigene16123_All	809	C	Y	48	C	36	63	63	T	34	9	9	72	0.174512	1	0	14
Unigene16123_All	843	T	K	99	T	36	100	100	G	37	16	16	116	0.363815	1	0	34
Unigene16123_All	933	G	K	99	G	31	52	52	T	33	13	13	65	0.428419	1	0	90
Unigene16123_All	1185	T	K	53	T	36	237	237	G	36	18	18	8102	0.299077	1	0	30
Unigene16123_All	1215	A	R	99	A	31	225	225	G	30	30	30	7069	0.0730661	1	0	30
Unigene16123_All	1386	A	W	40	A	31	203	203	T	28	44	44	2722	2.0782e-05	1	0	12
Unigene16123_All	1398	T	Y	99	T	32	188	188	C	33	66	66	3021	0.0485337	1	0	12
Unigene16123_All	1413	T	Y	99	T	35	207	207	C	34	48	48	2984	0.212057	1	0	15
Unigene16123_All	1500	C	Y	99	C	35	209	209	T	34	45	45	1271	0.494646	1	0	87
Unigene16123_All	1626	G	R	99	G	37	220	220	A	37	35	35	1411	0.388304	1	0	30
Unigene16123_All	1656	T	W	99	T	28	218	218	A	27	31	31	1795	0.406254	1	0	5
Unigene16123_All	1661	G	S	99	G	35	170	170	C	36	85	85	1679	0.109658	1	0	5
Unigene16123_All	1884	A	R	99	A	36	170	170	G	36	85	85	347	0.389712	1	0	188
Unigene16123_All	2072	C	Y	99	C	35	241	241	T	37	14	14	521	0.0775165	1	0	188
Unigene16124_All	58	A	M	99	C	36	7	7	A	37	6	6	13	0.472611	1	0	634
Unigene16124_All	1346	T	Y	71	T	31	15	15	C	33	6	6	21	0.683326	1	0	1125
Unigene16125_All	463	C	Y	99	C	36	240	240	T	38	15	15	298	0.162287	1	0	1125
Unigene16126_All	233	C	M	99	C	34	41	41	A	35	18	18	59	0.524582	1	0	98
Unigene16126_All	331	G	K	69	T	37	44	44	G	37	7	7	51	0.441473	1	0	98
Unigene16127_All	164	G	R	80	G	35	71	71	A	36	24	24	96	0.0957524	1	0	10
Unigene16127_All	174	A	R	72	A	36	81	81	G	37	21	21	102	0.0175917	1	0	10
Unigene16127_All	327	C	Y	99	C	37	115	115	T	37	19	19	134	0.292761	1	0	46
Unigene16127_All	373	C	Y	99	C	35	85	85	T	35	37	37	122	0.197064	1	0	46
Unigene16127_All	438	T	Y	99	T	36	215	215	C	35	18	18	233	0.234409	1	0	65
Unigene16127_All	735	G	R	99	G	36	106	106	A	35	24	24	130	0.129003	1	0	33
Unigene16127_All	772	A	R	99	A	32	70	70	G	33	40	40	110	0.374482	1	0	37
Unigene16127_All	847	A	R	99	A	34	48	48	G	33	24	24	72	0.160727	1	0	21
Unigene16127_All	868	T	Y	99	T	37	44	44	C	36	23	23	67	0.413759	1	0	18
Unigene16127_All	886	C	Y	99	C	37	46	46	T	36	18	18	64	0.144533	1	0	18
Unigene16127_All	1211	G	K	34	G	38	33	33	T	39	6	6	39	0.73866	1	0	152
Unigene16127_All	1363	C	Y	34	C	38	18	18	T	38	5	5	23	0.742816	1	0	152
Unigene16128_All	85	G	R	37	G	36	243	243	A	36	11	11	270	0.17798	1	0	285
Unigene16128_All	1021	T	K	99	T	36	93	93	G	35	24	24	118	0.0289308	1	0	617
Unigene16129_All	756	C	M	45	C	32	23	23	A	36	5	5	28	0.75	1	0	150
Unigene16129_All	945	T	Y	42	T	37	12	12	C	33	5	5	17	0.0134131	1	0	39
Unigene16129_All	1229	C	Y	94	C	36	10	10	T	36	7	7	17	0.481129	1	0	55
Unigene16129_All	1284	G	R	99	A	32	9	9	G	36	7	7	16	0.418531	1	0	55
Unigene16130_All	298	T	W	61	T	31	242	242	A	31	11	11	2870	0.0563566	1	0	33
Unigene16130_All	331	C	M	99	C	37	241	241	A	36	14	14	1569	0.250542	1	0	33
Unigene16130_All	367	A	R	99	A	37	233	233	G	39	22	22	1218	0.00100418	1	0	26
Unigene16130_All	393	T	Y	99	T	35	231	231	C	36	24	24	1138	0.387837	1	0	26
Unigene16130_All	721	T	K	24	T	33	183	183	G	33	19	19	202	0.109587	1	0	190
Unigene16130_All	911	G	R	91	G	32	238	238	A	32	17	17	2106	0.348998	1	0	105
Unigene16130_All	1016	A	M	99	A	35	242	242	C	34	13	13	1722	0.0741471	1	0	42
Unigene16130_All	1058	G	R	99	G	35	207	207	A	35	47	47	1202	0.285214	1	0	42
Unigene16130_All	1227	T	W	29	T	37	247	247	A	39	8	8	338	0.0274925	1	0	157
Unigene16130_All	1568	T	Y	99	T	34	222	222	C	32	33	33	676	0.00958185	1	0	15
Unigene16131_All	202	C	M	29	C	36	29	29	A	37	5	5	34	0.685344	1	0	108
Unigene16131_All	379	T	Y	99	T	36	21	21	C	38	9	9	30	0.211181	1	0	177
Unigene16131_All	730	G	R	42	G	30	109	109	A	34	8	8	117	0.0645972	1	0	286
Unigene16131_All	1016	A	W	99	A	38	132	132	T	37	35	35	167	0.288304	1	0	127
Unigene16131_All	1159	A	R	80	A	32	238	238	G	36	13	13	259	0.0254841	1	0	10
Unigene16131_All	1169	T	Y	34	T	37	210	210	C	35	10	10	220	0.207213	1	0	10
Unigene16131_All	1387	G	R	99	G	37	165	165	A	38	89	89	438	0.480012	1	0	49
Unigene16132_All	281	G	R	99	A	33	81	81	G	31	20	20	101	0.0445555	1	0	66
Unigene16132_All	347	G	R	99	A	36	71	71	G	37	39	39	110	0.392886	1	0	66
Unigene16132_All	1112	C	Y	99	T	35	40	40	C	37	28	28	69	0.0750386	1	0	12
Unigene16132_All	1223	C	Y	99	C	34	206	206	T	33	37	37	243	0.480753	1	0	21
Unigene16132_All	1244	C	Y	99	C	33	241	241	T	37	14	14	258	0.0160478	1	0	21
Unigene16132_All	1268	T	Y	99	C	36	154	154	T	35	93	93	247	0.0571789	1	0	24
Unigene16132_All	1316	T	Y	99	C	33	153	153	T	36	102	102	354	0.000522476	1	0	14
Unigene16132_All	1330	A	W	99	A	36	225	225	T	36	30	30	359	0.049777	1	0	14
Unigene16132_All	1524	A	R	99	G	36	141	141	A	38	87	87	228	0.162097	1	0	51
Unigene16132_All	1617	T	Y	99	C	37	84	84	T	35	38	38	122	0.268806	1	0	40
Unigene16132_All	1667	A	R	99	A	38	51	51	G	36	31	31	82	0.157666	1	0	50
Unigene16133_All	289	C	Y	99	T	30	178	178	C	34	74	74	305	1.25247e-07	1	0	198
Unigene16133_All	529	C	Y	99	T	37	47	47	C	36	21	21	69	0.0816908	1	0	81
Unigene16133_All	610	C	Y	99	T	34	50	50	C	32	19	19	69	0.302516	1	0	48
Unigene16133_All	658	A	R	99	G	34	38	38	A	34	15	15	53	0.275503	1	0	48
Unigene16133_All	781	A	R	99	G	34	50	50	A	35	9	9	60	0.551471	1	0	99
Unigene16133_All	880	A	W	99	T	36	72	72	A	34	29	29	101	0.424102	1	0	99
Unigene16133_All	1156	T	Y	99	C	37	195	195	T	39	60	60	272	1.66101e-05	1	0	72
Unigene16133_All	1228	C	Y	99	C	36	210	210	T	39	45	45	476	0.00157237	1	0	24
Unigene16133_All	1252	A	R	99	A	34	205	205	G	35	47	47	463	0.0994583	1	0	24
Unigene16133_All	1282	G	R	99	A	35	164	164	G	35	90	90	382	0.319318	1	0	30
Unigene16133_All	1375	G	S	99	G	37	228	228	C	38	22	22	250	0.425311	1	0	46
Unigene16133_All	1421	C	Y	99	T	34	93	93	C	36	42	42	135	0.00176004	1	0	8
Unigene16133_All	1429	T	W	99	A	32	92	92	T	35	41	41	133	0.00698218	1	0	6
Unigene16133_All	1435	G	K	99	T	34	77	77	G	35	34	34	111	0.456699	1	0	6
Unigene16133_All	1594	C	Y	99	T	37	30	30	C	36	23	24	54	0.6018	1.01852	0	159
Unigene16134_All	937	C	Y	95	C	37	15	15	T	35	8	8	23	0.566274	1	0	156
Unigene16134_All	1264	C	Y	48	C	33	39	39	T	24	10	10	50	0.0937351	1	0	5
Unigene16134_All	1269	A	M	78	A	34	38	38	C	33	13	13	51	0.747872	1	0	5
Unigene16135_All	65	C	Y	99	C	35	39	39	T	36	18	18	57	0.163385	1	0	104
Unigene16135_All	169	G	R	99	G	32	90	90	A	34	51	51	141	0.230903	1	0	78
Unigene16135_All	247	C	Y	99	C	36	178	178	T	37	77	77	305	0.0294395	1	0	78
Unigene16135_All	391	G	S	99	G	37	239	239	C	37	16	16	416	0.220574	1	0	10
Unigene16135_All	401	C	Y	99	C	37	161	161	T	37	94	94	438	0.35683	1	0	10
Unigene16135_All	616	C	Y	99	C	35	172	172	T	38	66	66	238	0.00250375	1	0	127
Unigene16135_All	743	G	R	99	G	35	114	114	A	37	79	79	193	0.228747	1	0	87
Unigene16135_All	830	C	S	99	C	32	31	31	G	30	15	15	47	0.338291	1	0	7
Unigene16135_All	930	T	Y	99	T	35	65	65	C	36	17	17	82	0.291486	1	0	80
Unigene16135_All	1010	A	W	99	A	35	90	90	T	36	19	19	109	0.266641	1	0	6
Unigene16135_All	1016	G	K	60	G	35	105	105	T	37	11	11	116	0.14241	1	0	6
Unigene16135_All	1219	T	Y	99	T	36	234	234	C	37	21	21	284	0.216377	1	0	5
Unigene16135_All	1224	C	Y	99	C	36	235	235	T	37	20	20	266	0.161074	1	0	5
Unigene16135_All	1268	T	W	99	T	36	173	173	A	38	11	11	185	0.0767236	1	0	37
Unigene16135_All	1305	T	W	57	T	35	233	233	A	34	10	10	243	0.212028	1	0	8
Unigene16135_All	1313	C	M	99	C	35	186	186	A	34	68	68	332	0.0261611	1	0	8
Unigene16135_All	1472	G	R	56	G	37	99	99	A	37	24	24	123	0.136167	1	0	7
Unigene16135_All	1479	A	M	99	A	36	76	76	C	37	43	43	119	0.0300009	1	0	7
Unigene16136_All	201	A	R	99	A	34	153	153	G	36	102	102	528	0.00225179	1	0	101
Unigene16136_All	302	A	R	99	A	36	141	141	G	36	114	114	615	0.331924	1	0	48
Unigene16136_All	350	G	R	70	G	35	238	238	A	34	16	16	479	0.217574	1	0	44
Unigene16136_All	394	G	K	67	G	34	246	246	T	35	9	9	255	0.297553	1	0	10
Unigene16136_All	404	T	W	99	T	35	151	151	A	37	104	104	263	0.00637885	1	0	10
Unigene16136_All	554	T	Y	99	T	34	97	97	C	33	45	45	142	0.106524	1	0	150
Unigene16136_All	760	T	W	99	T	33	39	39	A	36	16	16	55	0.555073	1	0	145
Unigene16136_All	905	C	Y	99	C	32	47	47	T	36	12	12	59	0.588972	1	0	68
Unigene16136_All	973	C	M	99	C	36	44	44	A	35	11	11	55	0.430032	1	0	68
Unigene16136_All	1055	G	R	99	G	36	24	24	A	34	13	13	37	0.131317	1	0	14
Unigene16136_All	1069	C	Y	99	C	34	19	19	T	35	10	10	29	0.736528	1	0	14
Unigene16136_All	1156	T	W	67	T	35	20	20	A	34	6	6	26	0.614257	1	0	11
Unigene16136_All	1205	T	W	99	T	35	9	9	A	35	8	8	17	0.0693953	1	0	31
Unigene16136_All	1236	A	R	78	A	30	7	7	G	27	7	7	14	0.450758	1	0	31
Unigene16136_All	1370	T	K	99	G	32	18	18	T	35	15	15	33	0.277873	1	0	50
Unigene16136_All	1457	A	W	99	A	35	25	25	T	34	14	14	39	0.0787285	1	0	87
Unigene16137_All	853	C	Y	99	C	37	48	48	T	37	33	33	81	0.310297	1	0	189
Unigene16137_All	1042	C	Y	99	T	37	31	31	C	36	25	25	56	0.139558	1	0	180
Unigene16137_All	1222	G	R	99	G	35	46	46	A	37	43	43	89	0.0270957	1	0	180
Unigene16138_All	462	T	Y	42	T	36	16	16	C	37	5	5	21	0.484053	1	0	63
Unigene16138_All	525	G	R	76	A	34	21	21	G	38	7	7	28	0.187783	1	0	44
Unigene16138_All	708	T	Y	99	T	37	119	119	C	37	37	37	156	0.234877	1	0	9
Unigene16138_All	717	T	Y	99	T	34	124	124	C	34	39	39	163	0.320331	1	0	9
Unigene16138_All	1119	C	Y	99	C	37	25	25	T	37	13	13	38	0.0625376	1	0	69
Unigene16138_All	1188	G	K	45	G	36	26	26	T	40	6	6	32	0.00203489	1	0	69
Unigene16139_All	60	C	Y	99	C	36	41	41	T	34	25	25	66	0.0738846	1	0	10
Unigene16139_All	219	C	Y	99	C	37	78	78	T	37	37	37	115	0.313855	1	0	159
Unigene16139_All	656	C	M	99	C	35	25	25	A	34	18	18	43	0.437118	1	0	220
Unigene16139_All	876	C	Y	99	T	37	90	90	C	37	69	69	161	0.342788	1	0	171
Unigene16139_All	1047	A	R	99	A	35	158	158	G	34	51	51	209	0.194855	1	0	81
Unigene16139_All	1128	T	W	99	T	35	242	242	A	37	12	12	662	0.263034	1	0	81
Unigene16139_All	1233	C	Y	99	C	35	136	136	T	35	119	119	681	0.065795	1	0	15
Unigene16139_All	1248	A	R	99	A	37	228	228	G	36	27	27	825	0.188612	1	0	15
Unigene16139_All	1491	T	W	99	A	33	162	162	T	34	90	90	357	0.456553	1	0	6
Unigene16139_All	1497	T	W	51	T	33	246	246	A	32	9	9	351	0.299948	1	0	6
Unigene16139_All	1524	C	Y	99	C	35	169	169	T	35	86	86	326	0.116892	1	0	27
Unigene1613_All	45	A	T	42	T	36	17	17	A	0	0	0	17	1	1	0	10
Unigene1613_All	343	T	Y	99	T	34	144	144	C	37	14	14	164	0.158564	1	0	31
Unigene1613_All	374	G	S	79	G	34	105	105	C	33	11	11	116	0.126117	1	0	20
Unigene1613_All	394	C	Y	99	T	37	74	74	C	36	71	71	145	0.318938	1	0	20
Unigene1613_All	538	T	W	99	T	33	72	72	A	34	22	22	101	0.453791	1	0	15
Unigene1613_All	553	G	K	99	G	34	129	129	T	32	87	87	217	0.0004937	1	0	15
Unigene1613_All	610	C	Y	99	T	36	131	131	C	36	124	124	363	0.368945	1	0	9
Unigene1613_All	663	A	R	99	A	37	173	173	G	36	82	82	356	0.0126802	1	0	53
Unigene1613_All	745	C	Y	99	C	36	242	242	T	37	13	13	270	0.298463	1	0	26
Unigene1613_All	771	G	R	99	G	37	168	168	A	38	17	17	185	0.189625	1	0	19
Unigene1613_All	790	G	R	57	G	35	183	183	A	36	10	10	193	0.347368	1	0	19
Unigene1613_All	823	G	K	99	G	33	130	130	T	32	27	27	157	0.0810828	1	0	32
Unigene1613_All	855	C	Y	92	C	37	240	240	T	38	15	15	484	0.490644	1	0	32
Unigene16140_All	262	C	Y	99	C	35	64	64	T	36	17	17	81	0.237844	1	0	20
Unigene16140_All	282	A	R	99	A	30	40	40	G	34	23	23	63	0.307445	1	0	20
Unigene16140_All	529	A	R	99	G	35	21	21	A	36	11	11	32	0.333689	1	0	51
Unigene16140_All	580	C	Y	99	T	36	15	15	C	36	11	11	26	0.634988	1	0	51
Unigene16140_All	866	G	R	99	A	37	75	75	G	38	40	40	115	0.0842513	1	0	249
Unigene16140_All	1115	T	Y	99	C	36	168	168	T	37	87	87	295	0.0348986	1	0	110
Unigene16140_All	1225	G	R	99	G	36	206	206	A	37	49	49	409	0.0683756	1	0	42
Unigene16140_All	1267	C	M	36	C	33	246	246	A	34	9	9	380	0.292789	1	0	42
Unigene16140_All	1419	T	W	80	T	38	15	15	A	29	7	7	22	0.546284	1	0	104
Unigene16140_All	1523	A	W	99	A	35	36	36	T	37	12	12	48	0.62561	1	0	104
Unigene16140_All	1631	C	Y	88	C	38	9	9	T	36	7	7	16	0.149563	1	0	108
Unigene16141_All	202	T	Y	99	T	29	46	46	C	31	23	23	69	0.251978	1	0	63
Unigene16141_All	265	G	K	35	G	29	55	55	T	36	7	7	62	0.512197	1	0	30
Unigene16141_All	295	T	Y	99	C	27	23	23	T	25	24	24	47	0.626541	1	0	30
Unigene16141_All	541	T	Y	99	T	32	15	15	C	31	14	14	30	0.711674	1	0	15
Unigene16141_All	582	C	Y	99	T	35	13	13	C	27	14	14	27	0.0188299	1	0	20
Unigene16141_All	602	T	W	28	T	36	26	26	A	32	5	5	31	0.548675	1	0	20
Unigene16141_All	634	G	R	57	G	36	35	35	A	33	9	9	44	0.0199978	1	0	32
Unigene16141_All	670	T	Y	50	T	33	34	34	C	33	7	7	41	0.506755	1	0	36
Unigene16141_All	982	T	Y	29	T	32	23	23	C	34	6	6	29	0.663871	1	0	44
Unigene16141_All	1026	T	Y	95	T	35	28	28	C	34	10	10	39	0.587635	1	0	44
Unigene16141_All	1096	C	S	80	C	35	71	71	G	38	12	12	83	0.0563431	1	0	70
Unigene16141_All	1219	A	R	88	A	33	84	84	G	37	14	14	98	0.00741345	1	0	30
Unigene16143_All	176	C	Y	99	C	36	111	111	T	38	95	95	206	0.000599463	1	0	42
Unigene16143_All	218	A	R	99	G	35	135	135	A	36	120	120	300	0.0984847	1	0	42
Unigene16143_All	318	G	K	99	G	36	183	183	T	37	72	72	263	0.168276	1	0	56
Unigene16143_All	388	C	M	99	C	36	133	133	A	36	38	38	171	0.031473	1	0	11
Unigene16143_All	677	A	M	99	A	33	75	75	C	33	49	49	124	0.292231	1	0	177
Unigene16143_All	1133	T	W	99	A	32	27	27	T	33	21	21	48	0.193102	1	0	10
Unigene16143_All	1143	G	K	99	T	33	14	14	G	30	15	15	29	0.670738	1	0	10
Unigene16143_All	1190	G	R	99	A	36	26	26	G	38	21	21	47	0.487323	1	0	47
Unigene16143_All	1355	C	M	99	A	35	20	20	C	36	14	14	34	0.424732	1	0	39
Unigene16143_All	1394	G	R	99	A	36	20	20	G	35	14	14	34	0.0484326	1	0	18
Unigene16143_All	1412	G	R	99	G	32	14	14	A	34	11	11	25	0.425406	1	0	17
Unigene16143_All	1429	C	Y	99	C	34	14	14	T	35	13	13	27	0.275089	1	0	17
Unigene16143_All	1451	T	G	55	G	36	24	24	T	0	0	0	24	1	1	0	22
Unigene16144_All	117	A	R	99	G	38	132	132	A	37	123	123	299	0.200867	1	0	368
Unigene16144_All	672	G	R	99	G	36	47	47	A	37	17	17	64	0.318742	1	0	375
Unigene16146_All	137	T	Y	99	T	36	69	69	C	33	17	17	86	0.310867	1	0	69
Unigene16146_All	364	C	Y	64	C	29	189	189	T	32	66	66	5055	6.89255e-05	1	0	15
Unigene16146_All	1282	A	R	99	A	36	199	199	G	36	55	55	322	0.49545	1	0	162
Unigene16149_All	52	A	M	60	A	36	118	118	C	36	13	13	131	0.193231	1	0	51
Unigene16149_All	246	C	Y	99	C	37	183	183	T	37	72	72	802	0.209753	1	0	48
Unigene16149_All	294	T	W	99	T	35	140	140	A	35	115	115	740	0.263353	1	0	48
Unigene16149_All	868	G	R	99	G	38	42	42	A	37	41	41	83	0.104388	1	0	261
Unigene1614_All	177	A	R	99	A	34	28	28	G	39	19	19	47	0.505284	1	0	26
Unigene1614_All	203	C	Y	99	C	33	28	28	T	39	13	13	41	0.500213	1	0	26
Unigene1614_All	527	T	K	99	T	33	15	15	G	37	8	8	23	0.253132	1	0	173
Unigene1614_All	700	G	R	64	A	37	23	23	G	38	5	5	28	0.75	1	0	110
Unigene1614_All	810	T	W	99	T	36	18	18	A	29	10	10	28	0.416098	1	0	45
Unigene1614_All	855	A	W	99	T	36	9	9	A	32	9	9	18	0.515631	1	0	45
Unigene16152_All	1121	A	R	99	G	35	66	66	A	38	41	41	107	0.00145804	1	0	18
Unigene16152_All	1139	A	R	99	A	37	61	61	G	37	42	42	103	0.160301	1	0	18
Unigene16152_All	1157	T	W	99	T	36	58	58	A	36	44	44	102	0.0412412	1	0	18
Unigene16153_All	127	T	W	99	A	37	13	13	T	34	9	9	22	0.0477785	1	0	18
Unigene16153_All	224	A	W	99	A	39	56	56	T	39	22	22	78	0.365341	1	0	97
Unigene16153_All	356	T	K	75	G	36	42	42	T	37	7	7	49	0.211873	1	0	59
Unigene16153_All	415	C	Y	99	T	37	12	12	C	37	7	7	19	0.741784	1	0	17
Unigene16153_All	432	G	R	75	A	31	18	18	G	34	6	6	24	0.247102	1	0	17
Unigene16153_All	710	A	W	99	A	35	105	105	T	36	49	49	154	0.173433	1	0	50
Unigene16153_All	760	C	S	40	C	35	242	242	G	37	13	13	273	0.184223	1	0	50
Unigene16153_All	940	G	R	40	G	36	36	36	A	36	6	6	42	0.678205	1	0	180
Unigene16154_All	729	T	Y	99	T	36	33	33	C	37	20	20	53	0.722886	1	0	12
Unigene16154_All	741	C	Y	99	C	37	30	30	T	38	17	17	47	0.119475	1	0	12
Unigene16155_All	612	A	W	25	A	34	184	184	T	36	6	6	190	0.18467	1	0	72
Unigene16156_All	109	T	Y	99	T	37	36	36	C	37	19	19	55	0.178017	1	0	39
Unigene16156_All	148	C	Y	99	C	38	45	45	T	38	14	14	60	0.226605	1	0	18
Unigene16156_All	166	A	M	83	A	36	49	49	C	32	11	11	60	0.112443	1	0	18
Unigene16156_All	194	C	Y	99	T	37	65	65	C	36	64	64	129	0.12279	1	0	19
Unigene16156_All	213	G	K	99	T	34	116	116	G	35	57	57	173	0.0252604	1	0	19
Unigene16156_All	322	C	Y	99	C	35	169	169	T	35	47	47	216	0.0659537	1	0	96
Unigene16156_All	418	G	R	99	A	34	66	66	G	33	61	61	127	0.218604	1	0	96
Unigene16156_All	564	C	S	99	C	33	160	160	G	34	14	14	174	0.401689	1	0	24
Unigene16156_All	634	G	K	99	G	33	183	183	T	35	72	72	261	0.0128609	1	0	70
Unigene16156_All	760	A	R	99	A	31	81	81	G	30	51	51	134	0.266345	1	0	126
Unigene16159_All	253	G	K	99	G	32	41	41	T	34	21	21	62	0.221194	1	0	189
Unigene1615_All	435	C	Y	99	C	31	165	165	T	30	86	86	8806	0.140298	1	0	12
Unigene1615_All	447	A	W	99	A	31	160	160	T	31	94	94	7198	0.0811453	1	0	12
Unigene1615_All	504	G	R	25	G	34	242	242	A	36	13	13	6820	0.00246151	1	0	27
Unigene1615_All	531	C	Y	99	C	31	232	232	T	31	22	22	5650	0.436074	1	0	19
Unigene1615_All	550	C	S	99	C	32	203	203	G	33	52	52	4384	0.201116	1	0	19
Unigene1615_All	723	G	R	99	G	32	154	154	A	33	101	101	953	0.0839087	1	0	15
Unigene1615_All	738	G	R	99	G	36	225	225	A	37	29	29	971	0.100097	1	0	15
Unigene1615_All	801	C	Y	99	C	34	166	166	T	35	89	89	1316	0.208837	1	0	6
Unigene1615_All	807	G	R	99	G	32	226	226	A	35	29	29	1346	0.0050647	1	0	6
Unigene1615_All	819	G	K	99	G	27	218	218	T	27	37	37	1444	0.287574	1	0	12
Unigene1615_All	906	G	K	99	G	32	231	231	T	28	24	24	1080	0.0443312	1	0	36
Unigene1615_All	942	C	S	81	C	32	240	240	G	30	15	15	720	0.01533	1	0	11
Unigene1615_All	953	C	Y	99	C	32	186	186	T	33	69	69	325	0.374803	1	0	11
Unigene1615_All	975	C	Y	99	C	36	232	232	T	37	23	23	283	0.338549	1	0	6
Unigene1615_All	993	G	R	99	G	38	212	212	A	38	43	43	269	0.215018	1	0	10
Unigene1615_All	1005	G	R	99	A	37	139	139	G	36	85	85	224	0.0195557	1	0	12
Unigene16162_All	83	A	R	93	A	38	26	26	G	37	8	8	34	0.597534	1	0	23
Unigene16162_All	111	A	W	99	A	36	40	40	T	39	11	11	51	0.103438	1	0	5
Unigene16162_All	116	G	R	95	G	37	57	57	A	38	11	11	68	0.188702	1	0	5
Unigene16162_All	207	G	S	99	G	34	164	164	C	38	13	13	177	0.00551566	1	0	91
Unigene16162_All	303	G	R	99	G	37	202	202	A	35	53	53	391	0.000156558	1	0	54
Unigene16162_All	357	T	K	99	T	33	204	204	G	35	51	51	289	0.00988649	1	0	54
Unigene16162_All	426	T	Y	45	T	37	242	242	C	39	13	13	363	0.0173672	1	0	45
Unigene16162_All	471	T	W	99	T	37	158	158	A	37	22	22	180	0.384077	1	0	27
Unigene16162_All	675	A	R	99	A	33	39	39	G	34	10	10	49	0.325599	1	0	37
Unigene16162_All	948	C	Y	60	C	33	34	34	T	33	8	8	42	0.614756	1	0	273
Unigene16163_All	699	G	K	99	G	36	232	232	T	38	23	23	283	0.000663975	1	0	315
Unigene16164_All	888	G	R	79	G	37	7	7	A	33	7	7	14	0.0364219	1	0	374
Unigene16165_All	95	G	S	99	G	34	67	67	C	36	33	33	100	0.170303	1	0	89
Unigene16165_All	304	A	W	73	A	32	18	18	T	37	7	7	25	0.510133	1	0	11
Unigene16165_All	315	A	R	61	A	36	16	16	G	39	7	7	23	0.509845	1	0	11
Unigene16166_All	51	G	R	99	G	36	59	59	A	38	55	55	114	0.0793938	1	0	42
Unigene16166_All	93	T	K	99	T	38	135	135	G	36	120	120	424	0.144051	1	0	37
Unigene16166_All	130	A	W	99	A	37	213	213	T	35	42	42	408	0.000886966	1	0	37
Unigene16166_All	197	G	K	99	T	36	153	153	G	36	102	102	430	0.171342	1	0	29
Unigene16166_All	265	A	M	99	A	34	236	236	C	29	19	19	420	0.0261932	1	0	17
Unigene16166_All	282	G	R	99	G	36	218	218	A	37	37	37	347	0.0890915	1	0	17
Unigene16167_All	653	C	Y	99	C	38	163	163	T	38	92	92	479	0.398836	1	0	231
Unigene16169_All	785	T	Y	99	T	30	26	26	C	31	15	15	41	0.705048	1	0	966
Unigene1616_All	268	A	W	99	A	37	50	50	T	37	18	18	68	0.250093	1	0	243
Unigene16170_All	183	T	W	99	T	32	16	16	A	35	7	7	23	0.409762	1	0	165
Unigene16170_All	348	G	R	99	G	36	11	11	A	36	10	10	21	0.743135	1	0	165
Unigene16172_All	922	G	R	99	G	36	87	87	A	37	60	60	147	0.484281	1	0	60
Unigene16173_All	532	C	Y	28	C	38	16	16	T	37	5	5	21	0.578186	1	0	27
Unigene16173_All	605	A	R	99	A	35	14	14	G	35	12	12	26	0.510078	1	0	44
Unigene16173_All	649	C	Y	49	C	34	16	16	T	33	8	8	24	0.565891	1	0	44
Unigene16173_All	802	T	Y	99	T	31	19	19	C	37	11	11	30	0.00541297	1	0	54
Unigene16173_All	949	T	Y	99	T	36	24	24	C	37	12	12	36	0.259128	1	0	47
Unigene16173_All	1094	A	W	99	A	36	46	46	T	36	11	11	57	0.678043	1	0	96
Unigene16175_All	140	A	R	99	G	32	169	169	A	33	58	58	227	0.282758	1	0	48
Unigene16175_All	188	T	K	99	T	35	218	218	G	34	24	24	242	0.432305	1	0	21
Unigene16175_All	209	G	R	99	G	36	214	214	A	37	27	27	241	0.413618	1	0	21
Unigene16175_All	253	T	W	99	T	37	124	124	A	37	16	16	140	0.342345	1	0	44
Unigene16175_All	329	C	Y	99	C	34	52	52	T	30	27	27	79	0.015177	1	0	76
Unigene16175_All	650	T	W	99	A	37	22	22	T	37	16	16	38	0.741266	1	0	95
Unigene16175_All	745	T	K	26	T	34	25	25	G	37	5	5	30	0.393738	1	0	95
Unigene16176_All	266	C	S	99	C	36	106	106	G	39	24	24	131	0.00291422	1	0	41
Unigene16176_All	307	G	K	99	G	30	90	90	T	28	23	23	113	0.0816409	1	0	41
Unigene16176_All	378	C	Y	34	C	36	140	140	T	36	14	14	154	0.294426	1	0	19
Unigene16176_All	541	C	Y	99	T	37	16	16	C	35	17	17	33	0.0590417	1	0	130
Unigene16176_All	715	A	R	99	A	36	17	17	G	36	12	12	29	0.422289	1	0	44
Unigene16176_All	869	G	R	63	G	36	16	16	A	36	7	7	23	0.225761	1	0	52
Unigene16177_All	35	A	M	70	A	37	42	42	C	37	9	9	51	0.637795	1	0	87
Unigene16177_All	122	A	R	99	A	36	138	138	G	36	97	97	235	0.282992	1	0	6
Unigene16177_All	128	C	Y	99	C	37	133	133	T	37	93	93	226	0.406441	1	0	6
Unigene16177_All	141	T	Y	99	T	35	139	139	C	34	93	93	232	0.44957	1	0	13
Unigene16177_All	180	C	M	99	C	32	151	151	A	33	103	103	285	0.105369	1	0	39
Unigene16177_All	219	C	Y	99	C	37	173	173	T	37	82	82	257	0.214815	1	0	17
Unigene16177_All	236	C	Y	99	C	37	186	186	T	37	69	69	260	0.320837	1	0	17
Unigene16177_All	533	T	W	99	T	34	160	160	A	34	95	95	495	0.491594	1	0	10
Unigene16177_All	543	G	R	99	G	31	133	133	A	30	121	121	579	0.140098	1	0	10
Unigene16177_All	641	C	Y	93	C	38	238	238	T	39	17	17	454	0.387472	1	0	25
Unigene16177_All	865	C	Y	91	C	32	244	244	T	32	11	11	427	0.388938	1	0	20
Unigene16177_All	885	A	W	99	T	34	10	10	A	37	9	9	19	0.611742	1	0	20
Unigene16178_All	1021	T	Y	99	T	36	10	10	C	38	8	8	18	0.0609946	1	0	281
Unigene16179_All	177	A	R	49	A	31	20	20	G	34	6	6	26	0.643185	1	0	45
Unigene16179_All	222	G	R	62	G	33	26	26	A	35	7	7	33	0.703214	1	0	11
Unigene1617_All	296	C	Y	36	C	36	56	56	T	37	8	8	64	0.248237	1	0	97
Unigene1617_All	393	A	R	99	A	37	69	69	G	36	49	49	118	0.265882	1	0	97
Unigene1617_All	747	G	S	99	G	34	45	45	C	35	14	14	59	0.440499	1	0	36
Unigene1617_All	783	T	W	29	T	32	31	31	A	35	5	5	37	0.640793	1	0	36
Unigene16180_All	224	T	W	52	T	35	153	153	A	37	11	11	164	0.258653	1	0	218
Unigene16180_All	686	T	Y	99	T	34	9	9	C	39	8	8	17	0.0136981	1	0	102
Unigene16180_All	833	A	G	20	G	36	8	8	A	0	0	0	8	1	1	0	45
Unigene16181_All	253	C	Y	99	C	36	130	130	T	37	15	15	145	0.153264	1	0	315
Unigene16181_All	568	T	Y	99	T	33	27	27	C	36	24	24	51	0.566005	1	0	198
Unigene16181_All	766	G	S	99	C	35	14	14	G	35	5	5	19	0.723297	1	0	198
Unigene16182_All	506	T	K	99	T	36	43	43	G	36	18	18	61	0.288895	1	0	317
Unigene16183_All	486	T	Y	99	T	36	18	18	C	33	10	10	28	0.103926	1	0	734
Unigene16184_All	183	C	S	99	G	36	30	30	C	34	21	21	51	0.496218	1	0	46
Unigene16184_All	229	A	R	99	G	37	40	40	A	33	33	33	73	0.0209821	1	0	46
Unigene16184_All	487	C	M	99	A	36	130	130	C	36	125	125	276	0.46515	1	0	258
Unigene16185_All	254	T	K	99	T	37	147	147	G	35	101	101	249	0.0424187	1	0	12
Unigene16185_All	267	C	Y	35	C	35	227	227	T	36	9	9	237	0.417189	1	0	8
Unigene16185_All	275	C	Y	92	C	35	240	240	T	33	15	15	257	0.151456	1	0	8
Unigene16185_All	288	T	Y	99	T	35	128	128	C	35	91	91	220	0.48921	1	0	13
Unigene16185_All	332	T	W	92	T	37	188	188	A	38	12	12	200	0.400494	1	0	44
Unigene16185_All	390	A	R	99	A	35	44	44	G	35	37	37	81	0.19413	1	0	29
Unigene16185_All	419	T	Y	99	T	34	45	45	C	32	26	26	71	0.0181016	1	0	29
Unigene16185_All	630	C	Y	99	C	36	13	13	T	34	11	11	24	0.410069	1	0	144
Unigene16185_All	831	G	R	99	G	39	15	15	A	35	11	11	26	0.000810364	1	0	21
Unigene16185_All	852	A	R	99	A	35	14	14	G	37	10	10	24	0.699023	1	0	21
Unigene16186_All	229	T	K	82	T	36	25	25	G	36	8	8	33	0.475392	1	0	207
Unigene16186_All	436	A	R	71	A	33	27	27	G	31	9	9	36	0.139261	1	0	53
Unigene16186_All	489	C	Y	61	C	37	14	14	T	37	6	6	20	0.516022	1	0	53
Unigene16187_All	172	A	W	78	A	35	34	34	T	33	8	8	42	0.640122	1	0	6
Unigene16187_All	178	T	W	80	T	35	34	34	A	37	8	8	42	0.546881	1	0	6
Unigene16187_All	199	A	M	78	A	35	32	32	C	38	8	8	40	0.520391	1	0	21
Unigene16187_All	764	G	R	99	G	36	175	175	A	37	80	80	313	0.00862111	1	0	100
Unigene16187_All	864	T	W	99	T	38	199	199	A	39	40	40	239	0.285981	1	0	33
Unigene16188_All	393	G	R	99	G	37	140	140	A	37	31	31	171	0.110311	1	0	154
Unigene16188_All	547	G	R	99	G	35	33	33	A	37	20	20	53	0.130855	1	0	154
Unigene16189_All	231	A	W	45	A	37	100	100	T	38	9	9	109	0.276082	1	0	157
Unigene16191_All	417	A	M	99	C	35	55	55	A	36	20	20	75	0.274572	1	0	147
Unigene16191_All	564	T	Y	99	C	35	44	44	T	36	25	25	69	0.475115	1	0	43
Unigene16191_All	621	C	Y	59	C	32	8	8	T	36	6	6	14	0.737429	1	0	14
Unigene16191_All	714	C	Y	99	C	34	104	104	T	33	16	16	120	0.381676	1	0	93
Unigene16191_All	927	T	W	82	A	38	11	11	T	37	5	5	16	0.665293	1	0	213
Unigene16192_All	217	T	W	99	T	38	142	142	A	37	113	113	344	0.22167	1	0	67
Unigene16192_All	284	G	K	99	G	33	103	103	T	35	92	92	196	0.0486025	1	0	67
Unigene16193_All	29	A	R	67	A	31	10	10	G	34	6	6	16	0.131743	1	0	165
Unigene16193_All	398	T	W	99	T	36	83	83	A	37	12	12	95	0.402663	1	0	42
Unigene16193_All	440	T	W	99	T	32	77	77	A	34	12	12	90	0.30484	1	0	42
Unigene16193_All	716	T	Y	49	T	30	35	35	C	34	7	7	42	0.528528	1	0	276
Unigene16194_All	104	G	R	99	G	35	25	25	A	35	11	11	36	0.75	1	0	36
Unigene16194_All	140	G	R	99	G	36	21	21	A	39	10	10	31	0.61022	1	0	36
Unigene16194_All	321	G	R	79	G	33	31	31	A	35	9	9	40	0.327861	1	0	5
Unigene16194_All	326	T	W	99	T	35	30	30	A	32	10	10	40	0.532842	1	0	5
Unigene16194_All	419	C	Y	64	C	33	24	24	T	38	7	7	31	0.611081	1	0	93
Unigene16194_All	881	G	A	30	A	40	19	19	G	40	1	1	20	1	1	0	223
Unigene16195_All	298	T	Y	99	C	36	36	36	T	36	25	25	61	0.71964	1	0	25
Unigene16195_All	562	T	W	99	A	36	170	170	T	31	83	83	253	1.52585e-08	1	0	96
Unigene16195_All	658	T	K	99	G	37	173	173	T	36	82	82	275	0.00702824	1	0	37
Unigene16195_All	695	A	R	99	G	37	114	114	A	38	65	65	179	0.295148	1	0	15
Unigene16195_All	710	A	R	99	A	36	161	161	G	37	17	17	178	0.143092	1	0	15
Unigene16195_All	778	T	W	99	A	37	161	161	T	37	93	93	459	0.355828	1	0	68
Unigene16196_All	74	G	R	87	G	36	203	203	A	37	25	25	228	0.456501	1	0	51
Unigene16196_All	125	C	Y	81	C	36	230	230	T	36	25	25	616	0.105544	1	0	51
Unigene16196_All	194	T	Y	99	T	34	204	204	C	35	51	51	760	0.0573862	1	0	9
Unigene16196_All	320	G	R	99	G	35	234	234	A	38	20	20	509	0.000515436	1	0	15
Unigene16196_All	335	A	R	99	G	34	151	151	A	36	103	103	424	0.00385122	1	0	15
Unigene16196_All	350	G	R	99	A	33	152	152	G	33	103	103	342	0.139554	1	0	15
Unigene16196_All	491	G	R	99	A	34	171	171	G	33	84	84	300	0.113769	1	0	9
Unigene16196_All	500	G	R	99	A	36	139	139	G	37	116	116	304	0.0156076	1	0	9
Unigene16196_All	515	G	R	99	G	37	219	219	A	38	36	36	321	0.156665	1	0	15
Unigene16196_All	599	G	R	99	G	35	163	163	A	36	17	17	180	0.446498	1	0	9
Unigene16196_All	608	G	R	99	G	36	107	107	A	34	60	60	167	0.0844236	1	0	9
Unigene16196_All	665	G	R	99	G	34	87	87	A	33	58	58	145	0.488731	1	0	9
Unigene16196_All	687	T	Y	99	T	35	128	128	C	36	19	19	147	0.347295	1	0	11
Unigene16196_All	698	A	R	99	A	37	73	73	G	37	68	68	141	0.137111	1	0	11
Unigene16196_All	911	G	R	91	G	39	7	7	A	37	6	6	13	0.534382	1	0	23
Unigene16196_All	934	A	W	88	A	36	6	6	T	37	5	5	11	0.634199	1	0	23
Unigene16197_All	71	A	M	63	A	38	26	26	C	38	6	6	32	0.623445	1	0	259
Unigene16198_All	244	A	R	99	A	32	81	81	G	32	19	19	102	0.41478	1	0	156
Unigene16198_All	400	T	Y	68	T	37	59	59	C	38	12	12	71	0.0947907	1	0	156
Unigene1619_All	35	T	W	99	T	38	25	25	A	34	10	10	35	0.532822	1	0	46
Unigene1619_All	138	C	Y	65	C	34	240	240	T	35	15	15	390	0.175933	1	0	57
Unigene1619_All	207	A	W	99	A	34	243	243	T	33	12	12	372	0.0623193	1	0	54
Unigene1619_All	261	G	S	99	G	35	222	222	C	34	33	33	428	0.445676	1	0	47
Unigene1619_All	308	C	Y	99	C	34	227	227	T	36	28	28	277	0.0604924	1	0	10
Unigene1619_All	318	A	R	88	A	33	187	187	G	28	17	17	204	0.00636953	1	0	10
Unigene1619_All	348	G	K	84	G	33	125	125	T	33	12	12	137	0.498481	1	0	30
Unigene1619_All	399	C	Y	99	C	37	143	143	T	38	25	25	168	0.272222	1	0	51
Unigene161_All	63	T	Y	99	C	38	9	9	T	39	7	7	16	0.203934	1	0	61
Unigene16200_All	453	T	Y	54	T	35	12	12	C	36	5	5	17	0.520362	1	0	180
Unigene16200_All	633	A	R	99	A	35	46	46	G	37	14	14	60	0.281136	1	0	26
Unigene16200_All	659	C	M	99	C	36	51	51	A	37	16	16	67	0.23108	1	0	26
Unigene16200_All	905	G	R	99	G	32	35	35	A	36	22	22	57	0.0158076	1	0	35
Unigene16202_All	93	A	R	99	A	36	168	168	G	37	87	87	338	0.0284188	1	0	30
Unigene16202_All	123	T	Y	99	T	37	223	223	C	38	32	32	476	0.0256394	1	0	30
Unigene16202_All	237	G	S	99	G	36	223	223	C	36	31	31	597	0.23573	1	0	45
Unigene16202_All	282	C	Y	99	C	35	219	219	T	34	36	36	563	0.271875	1	0	45
Unigene16204_All	20	A	R	53	A	37	7	7	G	38	5	5	12	0.75	1	0	19
Unigene16204_All	207	T	Y	99	T	36	94	94	C	38	28	28	122	0.0667085	1	0	127
Unigene16204_All	334	T	Y	99	T	32	143	143	C	32	19	19	163	0.316007	1	0	127
Unigene16204_All	799	C	Y	39	C	37	28	28	T	38	8	8	36	0.666931	1	0	240
Unigene16205_All	86	G	K	93	G	38	13	13	T	37	6	6	19	0.644718	1	0	266
Unigene16205_All	352	A	W	99	A	33	34	34	T	35	11	11	45	0.0291135	1	0	28
Unigene16205_All	380	G	S	99	G	33	23	23	C	36	12	12	35	0.372442	1	0	14
Unigene16205_All	394	C	Y	99	C	31	22	22	T	29	13	13	35	0.719904	1	0	14
Unigene16205_All	415	A	R	39	A	35	46	46	G	33	9	9	55	0.0659921	1	0	21
Unigene16205_All	454	T	Y	31	T	35	88	88	C	35	9	9	97	0.392215	1	0	12
Unigene16205_All	466	T	Y	99	T	34	79	79	C	35	45	45	125	0.322796	1	0	12
Unigene16205_All	521	C	Y	99	C	36	103	103	T	35	43	43	147	0.211038	1	0	55
Unigene16205_All	576	A	R	99	A	32	94	94	G	31	95	95	189	0.0133696	1	0	55
Unigene16205_All	661	C	S	99	C	34	130	130	G	34	34	34	164	0.161643	1	0	17
Unigene16205_All	678	G	R	45	G	34	121	121	A	36	10	10	132	0.0506877	1	0	17
Unigene16205_All	709	C	Y	99	C	31	104	104	T	32	22	22	126	0.0865399	1	0	20
Unigene16205_All	729	G	R	35	G	34	96	96	A	37	8	8	104	0.038462	1	0	20
Unigene16205_All	749	G	K	64	G	34	112	112	T	36	9	9	121	0.153296	1	0	20
Unigene16205_All	805	C	Y	99	C	31	204	204	T	31	46	46	337	0.185405	1	0	56
Unigene16205_All	874	C	M	99	C	34	200	200	A	31	54	54	378	0.000549952	1	0	20
Unigene16205_All	894	C	M	99	C	34	208	208	A	34	47	47	299	0.343507	1	0	20
Unigene16205_All	1045	A	R	99	G	37	19	19	A	32	12	12	31	0.0127216	1	0	11
Unigene16206_All	292	C	Y	99	C	34	97	97	T	36	26	26	123	0.112942	1	0	21
Unigene16206_All	358	T	K	31	T	33	153	153	G	36	8	8	161	0.283735	1	0	6
Unigene16206_All	364	C	Y	99	C	35	125	125	T	36	24	24	149	0.372466	1	0	6
Unigene16206_All	565	T	Y	99	T	37	88	88	C	36	57	57	145	0.476597	1	0	21
Unigene16206_All	586	C	M	99	C	35	131	131	A	37	37	37	168	0.00284323	1	0	12
Unigene16206_All	598	T	K	99	T	35	152	152	G	35	28	28	180	0.456002	1	0	12
Unigene16206_All	766	T	Y	43	T	35	230	230	C	36	10	10	240	0.432572	1	0	46
Unigene16206_All	812	C	M	99	C	35	174	174	A	36	64	64	239	0.259299	1	0	46
Unigene16208_All	111	A	M	99	C	35	198	198	A	37	57	57	445	0.000200896	1	0	123
Unigene16208_All	234	T	Y	99	C	37	178	178	T	36	77	77	402	0.162368	1	0	123
Unigene16208_All	695	T	Y	22	T	36	246	246	C	35	9	9	330	0.182956	1	0	21
Unigene16208_All	716	G	R	51	G	35	243	243	A	36	11	11	292	0.120029	1	0	9
Unigene16208_All	725	T	Y	99	T	35	201	201	C	35	52	52	253	0.268764	1	0	9
Unigene16208_All	737	A	R	99	A	33	197	197	G	34	58	58	336	0.222855	1	0	12
Unigene16208_All	755	G	R	99	G	35	217	217	A	36	36	36	280	0.145433	1	0	18
Unigene16208_All	803	T	W	99	T	37	211	211	A	36	43	43	291	0.048318	1	0	48
Unigene16208_All	857	G	R	99	G	36	214	214	A	36	41	41	406	0.297095	1	0	6
Unigene16208_All	863	G	R	99	G	35	139	139	A	35	116	116	433	0.0494226	1	0	6
Unigene16208_All	995	C	Y	99	C	36	193	193	T	37	62	62	292	0.415368	1	0	132
Unigene16209_All	182	T	K	99	T	33	9	9	G	35	7	7	16	0.268007	1	0	26
Unigene16209_All	228	C	M	87	C	38	14	14	A	32	7	7	21	0.500082	1	0	20
Unigene16209_All	309	A	R	62	A	38	8	8	G	38	5	5	13	0.142191	1	0	7
Unigene16209_All	330	G	K	99	G	38	8	8	T	38	6	6	14	0.603397	1	0	7
Unigene1620_All	373	G	R	31	G	34	9	9	A	39	5	5	14	0.547453	1	0	91
Unigene1620_All	479	T	Y	89	C	30	7	7	T	35	5	5	12	0.632576	1	0	66
Unigene1620_All	750	G	K	90	G	37	10	10	T	38	6	6	16	0.356394	1	0	38
Unigene1620_All	788	T	Y	99	T	37	19	19	C	36	19	19	38	0.600389	1	0	9
Unigene1620_All	797	A	R	25	A	39	47	47	G	34	8	8	55	0.514167	1	0	9
Unigene1620_All	902	C	Y	99	C	36	49	49	T	37	12	12	61	0.397558	1	0	21
Unigene1620_All	923	A	R	69	A	32	48	48	G	36	9	9	57	0.0518785	1	0	19
Unigene16211_All	93	G	R	76	G	31	236	236	A	26	19	19	326	0.000673603	1	0	129
Unigene16211_All	222	G	R	99	G	32	216	216	A	30	39	39	460	0.0161486	1	0	129
Unigene16211_All	351	A	M	99	A	27	203	203	C	27	50	50	614	0.246675	1	0	108
Unigene16211_All	459	C	M	99	C	36	224	224	A	36	31	31	890	0.307572	1	0	28
Unigene16211_All	487	T	W	99	T	34	189	189	A	34	66	66	694	0.246895	1	0	28
Unigene16211_All	576	C	Y	99	C	31	178	178	T	29	76	76	1083	0.0922505	1	0	15
Unigene16211_All	591	A	M	99	A	34	166	166	C	34	89	89	954	0.296542	1	0	15
Unigene16211_All	693	C	Y	99	C	31	221	221	T	32	29	29	1621	0.416182	1	0	46
Unigene16211_All	800	A	M	99	A	34	208	208	C	33	47	47	2114	0.118079	1	0	6
Unigene16211_All	953	T	W	99	T	34	236	236	A	32	19	19	4685	0.00037063	1	0	49
Unigene16213_All	67	T	W	99	A	37	6	6	T	28	7	7	13	0.025641	1	0	11
Unigene16213_All	78	C	Y	99	C	34	13	13	T	36	8	8	21	0.567114	1	0	11
Unigene16213_All	98	G	S	99	C	36	18	18	G	36	16	16	35	0.69961	1	0	15
Unigene16213_All	113	G	R	99	G	36	26	26	A	38	19	19	45	0.00126608	1	0	15
Unigene16213_All	207	G	R	99	G	37	25	25	A	35	26	26	51	0.543349	1	0	94
Unigene16213_All	360	G	R	63	G	33	21	21	A	33	6	6	27	0.23808	1	0	153
Unigene16213_All	691	G	K	99	G	35	28	28	T	35	26	26	54	0.677993	1	0	13
Unigene16213_All	704	G	R	62	G	36	51	51	A	39	8	8	59	0.743505	1	0	13
Unigene16213_All	744	G	R	99	G	34	42	42	A	35	32	32	74	0.225769	1	0	40
Unigene16213_All	999	A	R	99	A	38	48	48	G	35	44	44	92	0.00865469	1	0	255
Unigene16214_All	1355	T	Y	91	T	29	8	8	C	32	6	6	14	0.28638	1	0	112
Unigene16214_All	1561	G	R	34	G	35	35	35	A	40	8	8	43	0.00260725	1	0	86
Unigene16214_All	2037	A	W	50	A	38	44	44	T	40	5	5	49	0.154098	1	0	26
Unigene16215_All	67	G	R	99	G	35	66	66	A	28	20	20	86	6.01114e-07	1	0	120
Unigene16215_All	187	T	Y	38	T	36	109	109	C	38	11	11	120	0.0557404	1	0	93
Unigene16215_All	280	T	Y	22	T	34	76	76	C	36	8	8	84	0.430446	1	0	93
Unigene16215_All	570	T	Y	99	C	33	100	100	T	35	71	71	171	0.0423458	1	0	26
Unigene16215_All	596	T	Y	99	T	34	107	107	C	35	21	21	128	0.0582141	1	0	26
Unigene16215_All	889	C	Y	99	C	37	113	113	T	38	20	20	133	0.386076	1	0	90
Unigene16215_All	979	C	Y	62	C	34	26	26	T	36	7	7	33	0.099336	1	0	90
Unigene16216_All	431	A	M	82	A	37	15	15	C	38	6	6	21	0.595229	1	0	601
Unigene16216_All	1032	T	W	99	T	35	186	186	A	33	69	69	268	0.0193275	1	0	116
Unigene16216_All	1148	T	Y	99	T	36	75	75	C	38	28	28	103	0.0319323	1	0	116
Unigene16217_All	251	A	R	99	A	31	127	127	G	31	128	128	1256	0.447649	1	0	250
Unigene16217_All	536	C	Y	99	C	36	141	141	T	35	112	112	398	0.0294616	1	0	96
Unigene16217_All	632	T	W	99	T	35	156	156	A	35	92	92	261	0.0838175	1	0	96
Unigene16219_All	198	G	R	73	A	37	12	12	G	31	6	6	18	0.375135	1	0	212
Unigene16219_All	883	A	W	91	A	36	57	57	T	37	9	9	66	0.323554	1	0	18
Unigene1621_All	921	G	R	25	G	34	238	238	A	31	15	15	292	0.0271522	1	0	256
Unigene16220_All	323	C	Y	99	T	37	136	136	C	37	66	66	202	0.224126	1	0	48
Unigene16220_All	371	G	R	99	G	36	150	150	A	36	53	53	203	0.259569	1	0	48
Unigene16220_All	439	A	R	99	A	37	204	204	G	38	51	51	1326	0.00607317	1	0	68
Unigene16220_All	1057	G	R	99	G	36	220	220	A	34	32	32	594	5.79995e-05	1	0	18
Unigene16220_All	1075	C	Y	99	C	35	169	169	T	36	48	48	218	0.00415994	1	0	18
Unigene16223_All	709	T	Y	77	T	34	60	60	C	37	11	11	71	0.129604	1	0	140
Unigene16223_All	849	C	M	99	C	36	143	143	A	37	19	19	162	0.44823	1	0	140
Unigene16223_All	1053	A	R	81	A	35	138	138	G	34	21	21	159	0.348574	1	0	29
Unigene16223_All	1082	C	Y	99	C	36	137	137	T	39	15	15	152	0.0767772	1	0	27
Unigene16224_All	227	T	W	99	T	38	79	79	A	36	33	33	112	0.00400243	1	0	150
Unigene16224_All	402	C	Y	99	T	37	106	106	C	35	66	66	172	0.405434	1	0	11
Unigene16224_All	413	A	R	99	G	35	108	108	A	35	69	69	177	0.190716	1	0	11
Unigene16224_All	678	T	Y	99	C	36	157	157	T	35	98	98	733	0.0558072	1	0	31
Unigene16224_All	764	A	W	99	T	35	171	171	A	37	84	84	1238	2.44477e-05	1	0	86
Unigene16224_All	1015	T	Y	99	C	36	175	175	T	37	79	79	365	0.0372802	1	0	19
Unigene16225_All	256	C	Y	91	C	33	12	12	T	36	7	7	19	0.709236	1	0	201
Unigene16225_All	457	G	R	99	A	36	20	20	G	35	12	12	32	0.172795	1	0	201
Unigene16226_All	433	C	Y	99	C	35	77	77	T	37	12	12	89	0.231852	1	0	108
Unigene16226_All	541	T	Y	98	T	36	92	92	C	37	11	11	104	0.179232	1	0	108
Unigene16226_All	728	G	R	99	G	36	197	197	A	35	58	58	258	0.0773848	1	0	149
Unigene16226_All	985	C	S	99	C	36	58	58	G	36	37	37	95	0.247282	1	0	108
Unigene16227_All	286	A	R	99	A	37	190	190	G	35	33	33	223	0.0979296	1	0	603
Unigene16228_All	30	T	Y	99	T	37	36	36	C	36	20	20	56	0.531672	1	0	74
Unigene16228_All	143	T	Y	99	C	37	143	143	T	36	112	112	941	0.00665258	1	0	14
Unigene16228_All	157	C	M	99	A	37	150	150	C	38	105	105	959	0.0482368	1	0	5
Unigene16228_All	162	A	R	99	G	36	157	157	A	37	98	98	963	0.135746	1	0	5
Unigene16228_All	194	G	K	99	G	32	210	210	T	33	45	45	1091	0.468933	1	0	32
Unigene16228_All	254	T	Y	99	T	34	213	213	C	35	42	42	2022	0.399273	1	0	60
Unigene16228_All	411	A	R	99	A	34	156	156	G	35	99	99	1078	0.0745783	1	0	157
Unigene16228_All	573	C	Y	99	C	35	151	151	T	36	102	102	416	0.0631357	1	0	162
Unigene16228_All	735	G	R	99	G	36	112	112	A	37	51	51	163	0.0513321	1	0	33
Unigene16228_All	768	A	R	99	A	37	139	139	G	36	46	46	185	0.0605554	1	0	33
Unigene16228_All	861	G	R	99	G	32	145	145	A	33	23	23	169	0.491717	1	0	63
Unigene16228_All	924	G	R	99	G	34	166	166	A	33	64	64	231	0.475315	1	0	63
Unigene16228_All	1014	G	R	72	G	27	238	238	A	22	16	16	329	0.231257	1	0	61
Unigene16228_All	1075	G	S	81	G	37	245	245	C	36	10	10	327	0.215543	1	0	40
Unigene16228_All	1115	A	R	99	A	36	219	219	G	35	36	36	274	0.278795	1	0	10
Unigene16230_All	168	G	K	99	G	37	20	20	T	39	10	10	30	0.587593	1	0	25
Unigene16230_All	359	T	K	99	T	34	43	43	G	34	35	35	78	0.489981	1	0	13
Unigene16230_All	372	A	R	99	A	32	57	57	G	35	19	19	76	0.0820342	1	0	13
Unigene16230_All	551	T	K	95	T	28	33	33	G	32	10	10	43	0.243625	1	0	164
Unigene16231_All	208	C	Y	99	T	35	140	140	C	37	115	115	1278	0.000435834	1	0	24
Unigene16231_All	430	G	R	99	G	32	150	150	A	35	105	105	994	5.02163e-06	1	0	16
Unigene16231_All	469	C	Y	56	C	34	242	242	T	33	13	13	618	0.0201038	1	0	23
Unigene16231_All	496	G	R	99	G	35	134	134	A	36	121	121	957	0.321259	1	0	27
Unigene16231_All	736	C	Y	43	C	35	134	134	T	36	10	10	144	0.322852	1	0	35
Unigene16231_All	771	T	Y	98	T	36	167	167	C	36	13	13	180	0.470265	1	0	9
Unigene16231_All	876	G	R	99	G	32	79	79	A	32	74	74	153	0.376076	1	0	95
Unigene16232_All	100	T	W	99	A	35	137	137	T	34	41	41	179	0.357108	1	0	74
Unigene16232_All	174	A	R	99	A	35	224	224	G	35	30	30	820	0.495777	1	0	74
Unigene16232_All	429	C	Y	99	C	35	200	200	T	33	52	52	505	0.00258281	1	0	162
Unigene16232_All	633	A	R	99	G	36	151	151	A	36	104	104	1118	0.449476	1	0	42
Unigene16232_All	699	G	R	99	G	33	137	137	A	31	118	118	2016	0.002102	1	0	24
Unigene16232_All	753	T	W	99	T	35	129	129	A	35	126	126	2749	0.238635	1	0	6
Unigene16232_All	759	G	R	99	G	30	138	138	A	30	117	117	2820	0.260319	1	0	6
Unigene16233_All	29	A	T	36	T	38	26	26	A	37	1	1	27	1	1	0	57
Unigene16233_All	86	T	Y	99	T	37	42	42	C	35	12	12	54	0.314588	1	0	48
Unigene16233_All	134	C	Y	99	C	32	53	53	T	36	17	17	70	0.145803	1	0	12
Unigene16233_All	146	G	R	99	G	35	44	44	A	38	18	18	62	0.537057	1	0	12
Unigene16233_All	539	A	W	99	A	32	34	34	T	34	14	14	48	0.521723	1	0	52
Unigene16233_All	683	G	R	80	G	35	98	98	A	32	12	12	110	0.199408	1	0	144
Unigene16233_All	833	T	W	99	A	37	181	181	T	38	18	18	199	0.48032	1	0	9
Unigene16233_All	842	A	M	99	A	36	189	189	C	34	18	18	207	0.393683	1	0	9
Unigene16233_All	860	C	Y	99	T	33	168	168	C	35	34	34	203	0.0234896	1	0	10
Unigene16233_All	926	T	Y	99	C	36	227	227	T	35	28	28	331	0.167166	1	0	6
Unigene16233_All	932	T	Y	99	C	33	225	225	T	35	29	29	331	0.135434	1	0	6
Unigene16233_All	1007	A	R	85	G	37	191	191	A	36	32	32	226	0.37178	1	0	12
Unigene16234_All	731	G	R	99	G	36	189	189	A	36	66	66	318	0.408028	1	0	170
Unigene16234_All	912	A	W	99	A	33	83	83	T	33	40	40	123	0.0898559	1	0	181
Unigene16235_All	262	A	R	99	A	34	70	70	G	37	37	37	107	0.0228749	1	0	54
Unigene16235_All	316	C	Y	99	C	37	62	62	T	37	31	31	94	0.328461	1	0	43
Unigene16235_All	359	G	K	99	G	38	69	69	T	38	28	28	97	0.47144	1	0	43
Unigene16235_All	829	G	R	99	G	38	19	19	A	36	10	10	29	0.0972847	1	0	68
Unigene16235_All	897	T	Y	21	T	37	30	30	C	37	5	5	35	0.472701	1	0	22
Unigene16235_All	919	T	Y	45	T	35	30	30	C	36	6	6	36	0.394011	1	0	15
Unigene16235_All	934	A	W	71	A	35	28	28	T	35	6	6	34	0.745611	1	0	15
Unigene16236_All	630	T	Y	99	T	36	44	44	C	39	11	11	55	0.523678	1	0	30
Unigene16236_All	660	C	Y	81	C	35	55	55	T	38	10	10	65	0.116845	1	0	30
Unigene16236_All	696	G	R	78	G	36	69	69	A	33	13	13	82	0.00042052	1	0	36
Unigene16236_All	1001	C	M	99	C	35	156	156	A	37	25	25	181	0.0284731	1	0	47
Unigene16236_All	1048	C	M	99	C	38	146	146	A	37	23	23	169	0.104929	1	0	47
Unigene16237_All	366	A	R	99	A	36	29	29	G	34	21	21	50	0.120334	1	0	87
Unigene16237_All	453	T	Y	99	T	37	50	50	C	38	37	37	87	0.271074	1	0	87
Unigene16237_All	555	T	Y	78	T	35	43	43	C	33	19	19	64	0.577297	1	0	42
Unigene16237_All	597	C	Y	99	C	37	35	35	T	38	27	27	62	0.534204	1	0	42
Unigene16238_All	181	T	Y	99	T	36	158	158	C	35	18	18	176	0.165622	1	0	49
Unigene16238_All	230	G	R	99	G	35	216	216	A	34	24	24	240	0.05186	1	0	49
Unigene16238_All	854	A	M	42	A	38	55	55	C	36	9	9	64	0.331954	1	0	75
Unigene16238_All	960	G	R	65	G	35	21	21	A	36	7	7	28	0.708946	1	0	28
Unigene16239_All	231	C	S	99	G	35	85	85	C	36	61	61	146	0.177609	1	0	150
Unigene16239_All	431	G	R	26	G	35	47	47	A	37	8	8	55	0.458049	1	0	109
Unigene16239_All	540	T	K	99	T	31	37	37	G	30	27	27	64	0.321969	1	0	109
Unigene16241_All	118	T	Y	99	C	38	32	32	T	36	22	22	54	0.52595	1	0	68
Unigene16241_All	267	C	M	99	C	35	196	196	A	34	58	58	697	0.112055	1	0	54
Unigene16241_All	321	C	Y	99	C	36	177	177	T	37	78	78	558	0.0443229	1	0	24
Unigene16241_All	345	C	Y	51	C	36	241	241	T	37	14	14	638	0.266818	1	0	24
Unigene16241_All	615	G	R	99	G	33	168	168	A	34	87	87	399	0.421917	1	0	174
Unigene16241_All	789	G	R	99	G	33	166	166	A	33	89	89	289	0.192357	1	0	42
Unigene16241_All	831	G	K	99	T	32	185	185	G	32	64	64	249	0.181654	1	0	42
Unigene16241_All	977	T	Y	99	T	32	58	58	C	32	37	37	95	0.304554	1	0	146
Unigene16242_All	31	A	R	99	A	38	190	190	G	39	65	65	427	0.00391503	1	0	14
Unigene16242_All	52	C	S	99	C	34	189	189	G	33	66	66	550	0.0129297	1	0	11
Unigene16242_All	63	C	Y	44	C	27	210	210	T	21	44	44	554	7.59234e-09	1	0	11
Unigene16242_All	230	A	G	59	G	37	191	191	A	40	3	3	195	1	1	0	16
Unigene16242_All	279	A	W	99	A	38	134	134	T	36	120	120	254	0.000323481	1	0	30
Unigene16242_All	464	A	W	99	A	38	48	48	T	38	15	15	63	0.228517	1	0	5
Unigene16242_All	469	T	Y	99	T	39	47	47	C	37	16	16	63	0.233299	1	0	5
Unigene16242_All	496	T	Y	99	T	36	44	44	C	37	15	15	59	0.665103	1	0	27
Unigene16242_All	636	C	Y	99	C	37	28	28	T	34	20	20	48	0.508217	1	0	6
Unigene16242_All	642	T	Y	99	T	36	25	25	C	32	19	19	44	0.192232	1	0	6
Unigene16242_All	683	A	W	99	A	37	28	28	T	38	14	14	42	0.670703	1	0	41
Unigene16242_All	833	C	Y	99	C	34	181	181	T	35	44	44	225	0.352134	1	0	54
Unigene16244_All	323	C	Y	99	C	37	34	34	T	34	20	20	55	0.252568	1	0	126
Unigene16244_All	449	A	W	99	A	35	32	32	T	34	27	27	59	0.20063	1	0	126
Unigene16244_All	596	C	Y	99	C	34	68	68	T	36	36	36	104	0.0230138	1	0	99
Unigene16244_All	695	C	Y	50	C	35	103	103	T	31	12	12	115	0.0152462	1	0	39
Unigene16244_All	734	C	M	99	C	35	86	86	A	36	12	12	98	0.366407	1	0	39
Unigene16244_All	806	A	R	99	A	37	91	91	G	34	29	29	120	0.133591	1	0	72
Unigene16244_All	923	A	M	36	A	35	175	175	C	37	8	8	183	0.170518	1	0	117
Unigene16245_All	202	T	Y	99	T	35	90	90	C	34	44	44	148	0.191671	1	0	18
Unigene16245_All	220	A	R	99	G	33	46	46	A	34	30	30	76	0.212721	1	0	18
Unigene16245_All	250	C	Y	99	C	34	24	24	T	36	15	15	39	0.100771	1	0	30
Unigene16245_All	292	T	Y	99	T	37	42	42	C	35	12	12	54	0.625961	1	0	42
Unigene16245_All	346	G	R	99	G	36	43	43	A	35	27	27	70	0.0351614	1	0	32
Unigene16245_All	378	C	M	82	C	35	53	53	A	37	9	9	62	0.429841	1	0	32
Unigene16245_All	442	T	W	99	T	36	79	79	A	38	14	14	93	0.170851	1	0	15
Unigene16245_All	457	T	Y	99	T	33	73	73	C	37	17	17	90	0.0188957	1	0	15
Unigene16246_All	239	C	Y	99	C	36	25	25	T	36	15	15	40	0.631251	1	0	29
Unigene16246_All	268	G	R	78	G	32	38	38	A	31	10	10	49	0.321803	1	0	29
Unigene16246_All	826	G	R	99	G	35	224	224	A	34	31	31	338	0.472554	1	0	131
Unigene16246_All	957	G	R	99	G	36	116	116	A	37	65	65	181	0.241702	1	0	131
Unigene16247_All	251	T	K	99	T	34	135	135	G	34	120	120	501	0.392094	1	0	61
Unigene16247_All	312	G	R	99	A	36	131	131	G	37	124	124	510	0.118878	1	0	61
Unigene16249_All	55	C	Y	99	T	37	134	134	C	37	121	121	715	0.0705632	1	0	15
Unigene16249_All	70	A	R	99	A	38	176	176	G	38	79	79	724	0.279957	1	0	15
Unigene16249_All	98	T	Y	72	T	38	200	200	C	37	55	55	785	0.173799	1	0	9
Unigene16249_All	122	G	R	99	G	35	228	228	A	36	27	27	804	0.251695	1	0	24
Unigene16249_All	161	G	R	88	G	34	231	231	A	35	24	24	3525	0.395656	1	0	39
Unigene16249_All	219	T	K	99	T	35	141	141	G	35	114	114	4059	0.185668	1	0	7
Unigene16249_All	226	G	R	99	A	35	143	143	G	34	112	112	4045	0.0591511	1	0	7
Unigene16249_All	251	G	R	99	G	33	238	238	A	34	17	17	2615	0.278552	1	0	11
Unigene16249_All	262	A	W	99	A	31	142	142	T	31	113	113	3812	0.48364	1	0	11
Unigene16249_All	295	T	Y	99	C	32	186	186	T	37	69	69	4081	4.22475e-07	1	0	33
Unigene16249_All	358	A	R	99	A	36	226	226	G	39	29	29	1444	1.46702e-05	1	0	6
Unigene16249_All	400	A	R	99	A	33	134	134	G	32	121	121	1350	0.0081791	1	0	42
Unigene16249_All	442	A	R	99	A	32	191	191	G	33	62	62	982	0.037647	1	0	42
Unigene16249_All	502	G	K	99	G	33	133	133	T	34	122	122	557	0.270308	1	0	14
Unigene16249_All	542	T	W	72	T	35	244	244	A	39	11	11	520	0.00936841	1	0	11
Unigene16249_All	553	G	R	99	G	35	144	144	A	35	110	110	557	0.384426	1	0	11
Unigene16249_All	585	G	S	99	G	32	236	236	C	34	17	17	549	0.027215	1	0	32
Unigene16249_All	715	G	K	94	G	35	148	148	T	36	12	12	160	0.304402	1	0	12
Unigene16249_All	727	T	W	70	T	36	125	125	A	36	9	9	134	0.347858	1	0	12
Unigene16249_All	973	A	W	99	A	37	40	40	T	35	33	33	73	0.00911667	1	0	54
Unigene16249_All	1027	C	M	99	C	35	29	29	A	38	16	16	45	0.215595	1	0	16
Unigene16250_All	54	A	M	79	A	37	6	6	C	35	5	5	11	0.123377	1	0	27
Unigene16250_All	100	C	M	77	C	34	12	12	A	34	5	5	17	0.520362	1	0	10
Unigene16251_All	149	T	Y	94	T	32	8	8	C	37	6	6	14	0.586247	1	0	37
Unigene16252_All	117	G	R	68	G	38	29	29	A	37	10	10	39	0.109731	1	0	35
Unigene16253_All	107	G	R	99	G	37	82	82	A	35	14	14	97	0.411694	1	0	109
Unigene16257_All	100	G	R	40	G	34	15	15	A	39	6	6	21	0.00917736	1	0	47
Unigene16257_All	181	A	M	99	A	36	10	10	C	34	9	9	19	0.624175	1	0	81
Unigene1625_All	232	G	R	99	G	37	170	170	A	37	52	52	222	0.438725	1	0	52
Unigene1625_All	798	T	W	99	T	36	37	37	A	38	11	11	48	0.549136	1	0	54
Unigene16261_All	113	C	S	62	C	37	13	13	G	36	5	5	18	0.462068	1	0	6
Unigene16264_All	25	C	A	81	A	28	53	53	C	0	0	0	53	1	1	0	76
Unigene16266_All	56	C	M	99	A	38	11	11	C	37	11	11	22	0.238927	1	0	566
Unigene1626_All	51	C	Y	99	C	38	10	10	T	39	7	7	17	0.406263	1	0	25
Unigene1626_All	186	G	S	99	G	35	75	75	C	36	17	17	95	0.307484	1	0	135
Unigene1626_All	441	A	W	99	A	28	25	25	T	25	22	22	47	0.0411316	1	0	67
Unigene1626_All	508	G	S	99	G	28	24	24	C	36	10	10	34	0.0171663	1	0	67
Unigene16274_All	112	C	M	99	A	36	9	9	C	39	5	5	14	0.609391	1	0	11
Unigene16274_All	123	G	R	90	A	37	10	10	G	38	5	5	15	0.476523	1	0	11
Unigene1627_All	288	A	M	88	A	37	129	129	C	38	18	18	147	0.445946	1	0	275
Unigene16280_All	116	A	R	99	A	38	74	74	G	39	15	15	89	0.471603	1	0	78
Unigene16280_All	194	G	K	99	G	35	99	99	T	36	19	19	118	0.326249	1	0	14
Unigene16280_All	208	G	R	99	G	36	99	99	A	37	47	47	146	0.35856	1	0	14
Unigene16280_All	308	A	M	99	A	30	17	17	C	35	14	14	31	0.565529	1	0	32
Unigene16280_All	340	A	C	43	C	32	27	27	A	0	0	0	27	1	1	0	28
Unigene16282_All	54	A	R	45	A	38	12	12	G	38	5	5	17	0.760181	1	0	151
Unigene16284_All	313	G	R	99	A	32	20	20	G	36	8	8	28	0.524766	1	0	61
Unigene16284_All	374	A	R	54	A	39	23	23	G	39	7	7	30	0.684305	1	0	42
Unigene16285_All	81	A	W	74	A	36	141	141	T	38	10	10	151	0.083707	1	0	36
Unigene16285_All	182	T	Y	95	T	36	145	145	C	34	14	14	159	0.244178	1	0	101
Unigene16287_All	208	T	Y	97	T	29	9	9	C	32	7	7	16	0.689423	1	0	33
Unigene16287_All	241	A	R	99	G	34	8	8	A	35	6	6	14	0.586247	1	0	33
Unigene16287_All	304	G	R	78	G	38	6	6	A	35	6	6	12	0.154762	1	0	63
Unigene1628_All	138	C	Y	72	C	33	65	65	T	34	9	9	74	0.395656	1	0	19
Unigene16290_All	245	A	R	99	A	37	25	25	G	39	10	10	35	0.178859	1	0	192
Unigene16291_All	170	T	W	99	T	39	23	23	A	38	11	11	34	0.233756	1	0	366
Unigene16292_All	72	A	M	99	A	35	11	11	C	36	7	7	18	0.697854	1	0	251
Unigene16292_All	323	G	K	99	G	34	135	135	T	35	120	120	714	0.235381	1	0	136
Unigene16296_All	132	T	W	40	T	34	20	20	A	34	5	5	25	0.756559	1	0	81
Unigene16297_All	162	G	R	99	A	33	13	13	G	36	9	9	22	0.215518	1	0	39
Unigene16297_All	257	G	R	99	G	37	33	33	A	36	32	32	65	0.139508	1	0	95
Unigene16297_All	361	G	K	99	T	33	35	35	G	33	33	33	68	0.473096	1	0	76
Unigene16298_All	151	A	M	99	A	37	14	14	C	36	10	10	24	0.627002	1	0	25
Unigene16298_All	176	C	S	99	C	33	15	15	G	34	10	10	25	0.722953	1	0	25
Unigene1629_All	195	C	M	99	C	35	236	236	A	36	19	19	468	0.406079	1	0	11
Unigene162_All	994	T	W	36	T	38	25	25	A	38	5	5	30	0.611939	1	0	168
Unigene162_All	1162	A	R	34	A	35	61	61	G	36	9	9	70	0.346502	1	0	15
Unigene162_All	1177	A	W	56	A	37	65	65	T	38	8	8	73	0.489434	1	0	15
Unigene162_All	1245	G	K	82	G	35	46	46	T	37	11	11	57	0.0141409	1	0	65
Unigene162_All	1310	G	R	99	G	37	103	103	A	37	34	34	137	0.120797	1	0	65
Unigene16301_All	117	G	C	71	C	28	40	40	G	0	0	0	40	1	1	0	44
Unigene16301_All	378	A	W	99	T	35	19	19	A	34	17	17	36	0.612917	1	0	261
Unigene16302_All	130	G	S	99	G	37	58	58	C	38	38	38	96	0.21794	1	0	7
Unigene16302_All	137	G	R	99	G	37	72	72	A	35	39	39	112	0.139165	1	0	7
Unigene16302_All	189	A	W	99	A	28	45	45	T	27	20	20	66	0.443487	1	0	52
Unigene16302_All	426	C	S	99	C	32	46	46	G	35	22	22	68	0.00711473	1	0	51
Unigene16303_All	197	G	K	28	T	33	19	19	G	22	5	5	24	0.192574	1	0	54
Unigene16303_All	263	A	G	41	G	37	19	19	A	0	0	0	19	1	1	0	66
Unigene16304_All	334	A	R	99	G	38	36	36	A	38	30	30	66	0.469206	1	0	5
Unigene16304_All	339	T	W	28	T	38	56	56	A	36	9	9	65	0.0436876	1	0	5
Unigene16307_All	330	C	Y	99	T	35	21	21	C	39	9	9	30	0.502702	1	0	26
Unigene16308_All	90	T	K	85	G	35	5	5	T	27	6	6	11	0.607143	1	0	255
Unigene16309_All	130	G	K	99	T	36	12	12	G	36	11	11	23	0.571887	1	0	343
Unigene16310_All	108	T	W	99	A	37	22	22	T	33	23	23	45	0.501817	1	0	13
Unigene16310_All	139	A	W	99	T	35	30	30	A	32	21	21	51	0.507603	1	0	11
Unigene16310_All	150	T	Y	50	T	35	51	51	C	35	8	8	59	0.630188	1	0	11
Unigene16310_All	228	A	R	99	A	27	31	31	G	31	18	18	49	0.12624	1	0	18
Unigene16311_All	108	A	R	99	A	36	155	155	G	35	100	100	258	0.00662024	1	0	69
Unigene16311_All	197	T	W	99	T	29	216	216	A	30	38	38	289	0.282355	1	0	5
Unigene16311_All	202	T	W	99	A	34	147	147	T	33	97	97	244	0.441431	1	0	5
Unigene16312_All	165	T	W	99	T	35	18	18	A	33	11	11	29	0.337192	1	0	21
Unigene16314_All	375	C	M	51	C	36	13	13	A	39	5	5	18	0.551879	1	0	193
Unigene16316_All	312	A	R	56	A	37	7	7	G	39	5	5	12	0.0744949	1	0	267
Unigene16318_All	375	T	Y	99	C	33	14	14	T	34	9	9	23	0.367152	1	0	199
Unigene1631_All	192	A	M	81	A	35	6	6	C	35	5	5	11	0.732684	1	0	27
Unigene16321_All	450	A	R	23	A	34	49	49	G	37	7	7	56	0.0571262	1	0	276
Unigene16322_All	178	A	M	79	A	36	16	16	C	30	7	7	23	0.519061	1	0	394
Unigene16323_All	104	A	R	99	A	37	33	33	G	36	19	19	52	0.544739	1	0	41
Unigene16323_All	154	G	K	99	G	37	46	46	T	38	30	30	76	0.126646	1	0	15
Unigene16323_All	180	T	K	99	T	36	39	39	G	36	27	27	66	0.218877	1	0	7
Unigene16323_All	231	T	W	84	T	36	45	45	A	36	8	8	53	0.737858	1	0	15
Unigene16323_All	246	A	W	78	A	38	52	52	T	36	10	10	62	0.0173337	1	0	15
Unigene16325_All	114	C	M	99	C	33	132	132	A	31	17	17	149	0.0681492	1	0	177
Unigene16325_All	291	T	K	99	T	37	92	92	G	38	15	15	107	0.103707	1	0	177
Unigene16326_All	115	C	Y	99	T	37	14	14	C	32	16	16	30	0.611887	1	0	66
Unigene16326_All	181	A	M	99	A	34	59	59	C	38	26	26	86	0.000421853	1	0	66
Unigene16327_All	113	G	R	99	G	37	121	121	A	37	28	28	160	0.274212	1	0	119
Unigene16327_All	232	G	K	99	G	33	158	158	T	33	84	84	244	0.124549	1	0	88
Unigene16327_All	320	A	R	99	A	38	81	81	G	37	31	31	112	0.0886016	1	0	22
Unigene16328_All	176	C	Y	36	C	37	17	17	T	39	5	5	22	0.517658	1	0	37
Unigene16328_All	213	T	W	64	T	38	13	13	A	37	5	5	18	0.193627	1	0	37
Unigene16331_All	53	A	R	52	A	37	23	23	G	37	6	6	29	0.72394	1	0	1552
Unigene16339_All	274	A	R	99	A	31	16	16	G	35	14	14	30	0.0600709	1	0	17
Unigene16339_All	291	A	W	54	A	32	24	24	T	33	7	7	31	0.55854	1	0	17
Unigene16339_All	313	A	R	66	A	36	16	16	G	34	7	7	23	0.730534	1	0	22
Unigene16339_All	346	T	Y	99	C	34	12	12	T	35	9	9	21	0.605527	1	0	18
Unigene16340_All	253	G	R	95	G	33	9	9	A	38	7	7	16	0.234878	1	0	21
Unigene16340_All	274	G	R	95	G	34	11	11	A	31	8	8	19	0.64997	1	0	21
Unigene16341_All	192	C	Y	65	C	38	6	6	T	37	5	5	11	0.396104	1	0	33
Unigene16341_All	315	T	Y	68	C	34	5	5	T	30	5	5	10	0.345238	1	0	81
Unigene16342_All	314	A	W	99	A	37	13	13	T	39	7	7	20	0.75	1	0	39
Unigene16342_All	353	G	R	69	A	37	7	7	G	32	6	6	13	0.0903263	1	0	39
Unigene16342_All	406	T	Y	99	C	38	8	8	T	34	8	8	16	0.643434	1	0	41
Unigene16343_All	260	T	Y	25	T	36	38	38	C	37	6	6	44	0.414238	1	0	5
Unigene16343_All	386	G	R	80	G	32	20	20	A	35	7	7	27	0.0406338	1	0	63
Unigene16344_All	283	A	W	47	A	37	19	19	T	36	5	5	24	0.066382	1	0	24
Unigene16344_All	307	T	W	41	T	38	15	15	A	35	5	5	20	0.0208978	1	0	24
Unigene16346_All	43	G	S	74	G	33	13	13	C	38	5	5	18	0.518849	1	0	83
Unigene16346_All	153	A	M	66	A	33	13	13	C	37	5	5	18	0.675712	1	0	6
Unigene16346_All	267	T	Y	99	T	34	10	10	C	36	7	7	18	0.406263	1	0	60
Unigene16351_All	144	C	Y	99	T	37	18	18	C	33	10	10	28	0.246836	1	0	7
Unigene16351_All	239	G	R	59	G	38	18	18	A	40	6	6	24	0.57761	1	0	40
Unigene16353_All	25	G	S	99	G	37	195	195	C	38	60	60	1701	0.0411591	1	0	105
Unigene16353_All	130	C	Y	99	C	30	162	162	T	28	93	93	6188	0.0745296	1.07337	0	9
Unigene16353_All	154	C	T	33	T	30	255	255	C	0	0	0	4635	1	1.15771	0	7
Unigene16353_All	161	A	G	39	G	29	253	253	T	2	1	1	4381	1	1.18603	0	5
Unigene16353_All	166	C	Y	99	C	31	200	200	T	31	55	55	4039	0.121531	1.20946	0	5
Unigene16353_All	241	C	M	99	C	36	244	1443	A	35	11	12	3020	0.075571	1.6096	0	9
Unigene16353_All	250	A	M	94	A	37	244	1310	C	38	11	11	3315	0.385738	1.51403	0	9
Unigene16355_All	185	G	K	25	T	37	21	21	G	27	5	5	26	0.00471521	1	0	18
Unigene16355_All	203	C	S	86	C	31	20	20	G	37	6	6	26	0.0414151	1	0	18
Unigene16355_All	287	A	T	40	T	36	17	17	C	8	1	1	18	1	1	0	12
Unigene16358_All	261	C	Y	73	C	31	237	237	T	32	17	17	1789	0.343372	1	0	8
Unigene16358_All	358	A	W	99	A	36	238	238	T	37	17	17	1581	0.175506	1	0	16
Unigene16358_All	374	T	W	99	T	35	229	229	A	34	23	23	1336	0.338843	1	0	16
Unigene16359_All	428	T	Y	51	T	36	54	54	C	33	9	9	63	0.616952	1	0	10
Unigene16359_All	438	A	W	99	A	37	43	43	T	38	20	20	63	0.296425	1	0	10
Unigene16359_All	459	T	K	99	T	38	36	36	G	37	19	19	55	0.260832	1	0	21
Unigene1635_All	131	T	Y	99	T	35	17	17	C	39	9	9	26	0.506246	1	0	195
Unigene16360_All	165	A	R	78	A	38	18	18	G	37	7	7	25	0.488223	1	0	6
Unigene16360_All	241	A	R	60	A	33	30	30	G	34	8	8	38	0.718629	1	0	6
Unigene16360_All	296	A	R	25	A	38	30	30	G	37	6	6	36	0.17435	1	0	10
Unigene16360_All	306	A	R	23	A	34	26	26	G	38	5	5	31	0.645938	1	0	10
Unigene16362_All	81	T	W	90	T	38	17	17	A	39	7	7	24	0.725341	1	0	595
Unigene16365_All	1307	C	Y	67	T	35	10	10	C	30	5	5	15	0.027639	1	0	119
Unigene16366_All	229	C	S	34	C	28	73	73	G	34	7	7	80	0.11011	1	0	19
Unigene16366_All	248	T	W	67	T	32	36	36	A	34	8	8	48	0.582333	1	0	11
Unigene16366_All	259	A	R	36	A	26	44	44	G	29	8	8	57	0.132312	1	0	11
Unigene16366_All	298	G	R	99	A	37	33	33	G	35	16	16	49	0.513942	1	0	31
Unigene16368_All	207	T	K	71	T	35	20	20	G	34	6	6	26	0.573857	1	0	127
Unigene16369_All	66	A	W	51	A	39	28	28	T	35	6	6	34	0.0745054	1	0	305
Unigene1636_All	98	A	W	99	T	29	16	16	A	36	12	12	28	0.533248	1	0	50
Unigene1636_All	153	G	R	99	A	37	22	22	G	35	19	19	41	0.118522	1	0	55
Unigene16371_All	178	T	C	27	C	29	20	20	T	14	1	1	21	1	1	0	9
Unigene16371_All	202	A	M	99	A	38	16	16	C	33	11	11	27	0.544464	1	0	24
Unigene16371_All	244	G	S	99	C	35	14	14	G	35	13	13	27	0.291322	1	0	42
Unigene16372_All	220	C	M	22	C	37	29	29	A	40	5	5	34	0.224143	1	0	41
Unigene16372_All	261	C	M	25	C	37	23	23	A	24	7	7	30	0.0784192	1	0	41
Unigene16375_All	221	G	R	99	G	35	68	68	A	35	28	28	96	0.398226	1	0	60
Unigene16376_All	202	C	M	75	C	35	102	102	A	34	9	9	111	0.1982	1	0	78
Unigene16377_All	203	G	S	99	G	33	26	26	C	36	9	9	35	0.515221	1	0	97
Unigene16378_All	165	G	K	50	G	36	17	17	T	38	5	5	22	0.562201	1	0	20
Unigene16378_All	185	G	R	39	G	36	24	24	A	38	6	6	31	0.297635	1	0	11
Unigene16378_All	196	A	W	99	A	34	19	19	T	37	11	11	30	0.174772	1	0	11
Unigene1637_All	173	A	W	99	A	37	125	125	T	37	13	13	138	0.332259	1	0	18
Unigene1637_All	227	C	Y	99	C	32	28	28	T	33	21	21	49	0.297795	1	0	23
Unigene1637_All	250	T	Y	99	T	34	37	37	C	37	14	14	51	0.515309	1	0	23
Unigene16380_All	144	A	R	99	A	35	55	55	G	37	30	30	85	0.00975116	1	0	489
Unigene16381_All	191	C	S	28	C	37	112	112	G	37	9	9	121	0.404383	1	0	489
Unigene16382_All	215	G	R	99	G	38	57	57	A	38	11	11	68	0.427321	1	0	406
Unigene16383_All	111	C	Y	99	T	32	29	29	C	32	28	28	57	0.640732	1	0	99
Unigene16383_All	210	T	W	39	T	29	58	58	A	30	7	7	65	0.391618	1	0	99
Unigene16385_All	104	C	M	55	C	36	84	115	A	37	8	8	123	0.436695	1.25203	0	17
Unigene16385_All	178	C	Y	99	T	37	96	96	C	35	66	66	163	0.0359464	1	0	20
Unigene16385_All	198	T	W	27	T	37	149	149	A	33	9	9	159	0.00345949	1	0	20
Unigene16385_All	234	A	R	99	A	36	141	141	G	36	52	52	193	0.325758	1	0	36
Unigene16388_All	165	C	Y	34	C	36	17	17	T	35	5	5	22	0.662148	1	0	28
Unigene16388_All	193	G	S	99	G	37	19	19	C	36	10	10	29	0.650939	1	0	28
Unigene16388_All	277	G	R	99	A	35	13	13	G	33	11	11	24	0.623508	1	0	31
Unigene16388_All	308	G	S	99	C	36	12	12	G	32	13	13	25	0.514919	1	0	31
Unigene16391_All	186	A	W	99	A	37	138	138	T	37	19	19	158	0.213642	1	0	34
Unigene16391_All	220	C	Y	99	T	35	114	114	C	37	98	98	212	6.92801e-05	1	0	34
Unigene16391_All	276	G	A	95	A	35	82	82	G	35	1	1	83	1	1	0	10
Unigene16394_All	68	T	Y	99	T	38	46	46	C	38	29	29	75	0.0794346	1	0	52
Unigene16394_All	193	G	R	99	G	35	169	169	A	36	86	86	1136	0.00774212	1	0	35
Unigene16398_All	108	G	K	42	G	36	22	22	T	36	5	5	27	0.369677	1	0	11
Unigene16398_All	208	T	K	59	T	36	46	46	G	38	9	9	55	0.283955	1	0	15
Unigene16398_All	223	C	Y	87	C	36	55	55	T	33	12	12	67	0.0253485	1	0	15
Unigene16398_All	328	T	Y	73	T	35	21	21	C	37	7	7	28	0.593892	1	0	52
Unigene16398_All	380	T	K	93	T	35	7	7	G	37	6	6	13	0.573718	1	0	52
Unigene16403_All	152	A	R	99	A	35	16	16	G	36	11	11	27	0.322378	1	0	59
Unigene16404_All	214	C	Y	99	C	36	79	79	T	38	41	41	120	0.0033225	1	0	418
Unigene16409_All	273	T	C	41	C	38	15	15	T	0	0	0	15	1	1	0	28
Unigene16409_All	308	A	T	47	T	37	17	17	A	0	0	0	17	1	1	0	35
Unigene1640_All	231	T	Y	99	T	36	176	176	C	35	78	78	284	0.489291	1	0	53
Unigene1640_All	284	T	Y	99	T	36	43	43	C	35	41	41	84	0.228821	1	0	53
Unigene16413_All	111	C	S	89	C	38	10	10	G	38	6	6	16	0.396229	1	0	19
Unigene16415_All	280	A	R	99	A	33	23	23	G	31	11	11	35	0.162778	1	0	22
Unigene16415_All	401	T	K	87	T	36	14	14	G	37	7	7	21	0.728281	1	0	16
Unigene16415_All	417	A	W	28	A	38	13	13	T	34	5	5	18	0.0585901	1	0	16
Unigene16424_All	44	T	Y	99	T	36	21	21	C	35	10	10	31	0.475171	1	0	276
Unigene16429_All	157	C	Y	77	C	38	15	15	T	35	7	7	22	0.592102	1	0	87
Unigene16429_All	244	C	Y	80	C	32	20	20	T	33	8	8	28	0.650127	1	0	37
Unigene16429_All	281	C	M	99	C	34	16	16	A	33	8	8	24	0.191302	1	0	30
Unigene16429_All	311	T	Y	99	T	35	12	12	C	38	8	8	20	0.552072	1	0	30
Unigene16431_All	485	G	K	99	G	30	31	31	T	35	22	22	53	0.543605	1	0	46
Unigene16431_All	531	A	R	99	A	36	42	42	G	37	27	27	69	0.121395	1	0	39
Unigene16433_All	88	G	K	99	T	38	7	7	G	36	6	6	13	0.534382	1	0	31
Unigene16433_All	132	G	R	99	A	34	10	10	G	33	6	6	16	0.718719	1	0	44
Unigene16434_All	143	C	Y	99	C	33	69	69	T	30	15	15	85	0.0581094	1	0	42
Unigene16434_All	185	A	W	99	A	37	76	76	T	36	29	29	105	0.0883538	1	0	42
Unigene16436_All	109	G	R	40	G	38	15	15	A	39	5	5	20	0.115003	1	0	54
Unigene16439_All	68	G	T	28	T	39	11	11	G	0	0	0	11	1	1	0	226
Unigene16439_All	387	C	Y	99	T	35	25	25	C	39	14	14	39	0.000102518	1	0	19
Unigene16443_All	306	T	C	29	C	37	11	11	T	0	0	0	11	1	1	0	99
Unigene16443_All	412	G	R	30	A	31	27	27	G	28	5	5	32	0.272391	1	0	17
Unigene16446_All	405	T	K	99	T	35	48	48	G	35	20	20	68	0.309241	1	0	463
Unigene16447_All	280	C	M	99	C	37	18	18	A	35	14	14	32	0.594306	1	0	53
Unigene16447_All	333	G	R	61	A	30	11	11	G	29	5	5	16	0.291667	1	0	53
Unigene1644_All	72	G	S	99	G	37	42	42	C	37	25	25	67	0.0974176	1	0	98
Unigene1644_All	170	C	Y	99	C	31	47	47	T	34	21	21	68	0.0232334	1	0	30
Unigene1644_All	200	C	Y	46	C	36	67	67	T	37	12	12	79	0.340988	1	0	24
Unigene1644_All	224	C	S	99	C	38	58	58	G	36	17	17	75	0.0467983	1	0	24
Unigene16450_All	179	A	R	51	A	36	133	133	G	38	25	25	158	0.0170994	1	0	65
Unigene16450_All	244	A	W	68	A	38	22	22	T	38	6	6	28	0.07742	1	0	65
Unigene16453_All	151	A	W	51	A	36	35	35	T	26	9	9	44	0.00192697	1	0	8
Unigene16453_All	205	C	M	90	C	38	40	40	A	37	8	8	48	0.387847	1	0	8
Unigene16455_All	275	T	K	72	T	34	20	20	G	36	5	5	25	0.743441	1	0	84
Unigene16462_All	250	C	Y	99	T	40	10	10	C	38	6	6	16	0.437438	1	0	33
Unigene16467_All	269	G	K	92	T	34	8	8	G	32	5	5	13	0.177156	1	0	947
Unigene16469_All	232	A	R	99	G	36	11	11	A	34	8	8	19	0.587766	1	0	25
Unigene16469_All	273	C	S	99	C	35	15	15	G	38	13	13	28	0.00558023	1	0	41
Unigene1646_All	247	G	R	20	G	34	67	67	A	36	8	8	75	0.378684	1	0	35
Unigene1646_All	282	G	R	99	A	38	40	40	G	37	28	28	68	0.396783	1	0	35
Unigene16474_All	82	C	Y	99	C	38	27	27	T	38	13	13	40	0.420958	1	0	11
Unigene16474_All	93	T	Y	99	T	37	28	28	C	36	16	16	44	0.0148582	1	0	11
Unigene16474_All	247	A	R	87	A	34	11	11	G	35	6	6	17	0.720911	1	0	30
Unigene16479_All	71	C	Y	81	T	36	6	6	C	40	5	5	11	0.0887446	1	0	54
Unigene16479_All	125	G	C	21	C	34	9	9	G	0	0	0	9	1	1	0	54
Unigene16479_All	197	A	R	95	G	37	13	13	A	38	6	6	19	0.561017	1	0	30
Unigene16479_All	277	A	R	99	G	35	8	8	A	35	6	6	14	0.603397	1	0	49
Unigene1647_All	124	G	R	43	G	35	17	17	A	39	5	5	22	0.579821	1	0	14
Unigene1647_All	151	A	R	49	A	36	16	16	G	35	6	6	22	0.320333	1	0	27
Unigene16481_All	125	C	Y	99	T	38	171	171	C	35	84	84	390	0.00202592	1	0	28
Unigene16481_All	184	G	R	99	A	33	183	183	G	29	72	72	390	0.000785651	1	0	30
Unigene16481_All	239	A	W	99	T	37	184	184	A	37	71	71	328	0.107005	1	0	10
Unigene16481_All	297	A	M	99	C	33	102	102	A	32	40	40	142	0.474687	1	0	33
Unigene16484_All	201	A	R	47	A	40	6	6	G	37	5	5	11	0.0627706	1	0	403
Unigene16485_All	161	C	Y	99	C	35	19	19	T	29	18	18	37	0.110666	1	0	68
Unigene16485_All	229	A	W	99	A	35	15	15	T	35	14	14	29	0.577536	1	0	68
Unigene16486_All	18	A	R	99	A	37	163	163	G	37	92	92	289	0.274174	1	0	5
Unigene16486_All	118	G	R	37	G	36	244	244	A	36	11	11	499	0.287029	1	0	24
Unigene16486_All	142	C	Y	27	C	37	243	243	T	36	12	12	496	0.440244	1	0	24
Unigene16486_All	241	A	R	99	A	37	162	162	G	38	23	23	185	0.134627	1	0	42
Unigene16487_All	92	A	M	25	A	35	38	38	C	36	6	6	44	0.152627	1	0	290
Unigene16488_All	53	A	R	83	A	34	30	30	G	35	13	13	43	0.473991	1	0	52
Unigene16488_All	261	T	Y	50	T	35	16	16	C	34	6	6	22	0.660166	1	0	208
Unigene16491_All	217	T	Y	29	T	35	46	46	C	39	7	7	53	0.501552	1	0	94
Unigene16491_All	311	C	M	99	C	32	60	60	A	37	29	29	89	8.4204e-07	1	0	70
Unigene16492_All	151	A	R	99	A	37	137	137	G	36	37	37	175	0.406239	1	0	205
Unigene16494_All	62	T	Y	99	T	36	85	85	C	36	33	33	118	0.142927	1	0	7
Unigene16494_All	141	A	R	67	A	35	119	119	G	33	11	11	130	0.212176	1	0	79
Unigene16501_All	159	A	R	99	A	37	68	68	G	37	13	13	81	0.436114	1	0	350
Unigene16503_All	79	C	M	82	C	36	202	202	A	37	15	15	217	0.435666	1	0	55
Unigene16503_All	134	T	Y	99	T	32	134	134	C	33	36	36	170	0.270848	1	0	55
Unigene16504_All	214	C	Y	99	C	34	212	212	T	35	43	43	309	0.0191577	1	0	226
Unigene16505_All	260	G	K	99	G	33	156	156	T	37	16	16	172	0.0405001	1	0	143
Unigene16505_All	403	A	W	39	A	37	37	37	T	38	7	7	44	0.425333	1	0	143
Unigene16506_All	57	C	M	99	C	35	28	28	A	37	16	16	44	0.175765	1	0	103
Unigene16506_All	160	A	W	99	A	36	26	26	T	37	23	23	49	0.736155	1	0	103
Unigene16506_All	319	G	S	99	G	34	21	21	C	35	8	8	29	0.50953	1	0	16
Unigene16506_All	420	T	K	54	T	35	8	8	G	34	5	5	13	0.21756	1	0	63
Unigene16506_All	483	A	R	99	G	37	12	12	A	37	7	7	19	0.267921	1	0	16
Unigene16508_All	335	G	R	99	G	35	14	14	A	32	14	14	28	0.333666	1	0	41
Unigene16510_All	219	T	Y	56	T	37	12	12	C	38	5	5	17	0.610537	1	0	487
Unigene16511_All	98	T	K	99	T	37	30	30	G	38	16	16	46	0.6401	1	0	55
Unigene16511_All	186	G	S	99	C	34	26	26	G	33	24	24	50	0.332441	1	0	24
Unigene16511_All	300	G	R	72	G	36	21	21	A	37	7	7	28	0.719118	1	0	114
Unigene16512_All	287	C	M	31	C	36	39	39	A	33	7	7	46	0.0506309	1	0	135
Unigene16512_All	422	T	Y	74	T	37	12	12	C	38	10	10	22	0.634665	1	0	135
Unigene16516_All	162	T	Y	99	C	37	11	11	T	39	7	7	18	0.123146	1	0	34
Unigene16516_All	196	C	M	99	C	33	11	11	A	36	9	9	20	0.543853	1	0	11
Unigene16516_All	207	T	Y	99	C	34	13	13	T	34	13	13	26	0.272302	1	0	11
Unigene16516_All	424	C	Y	99	T	34	11	11	C	37	9	9	20	0.65067	1	0	25
Unigene16516_All	449	C	S	99	G	29	12	12	C	34	7	7	19	0.529958	1	0	25
Unigene16516_All	477	T	Y	91	C	35	6	6	T	34	5	5	11	0.331169	1	0	28
Unigene16516_All	512	G	R	94	A	34	13	13	G	35	8	8	21	0.613952	1	0	35
Unigene16517_All	411	C	T	70	T	33	49	49	C	0	0	138	187	1	2.47594	0	5
Unigene16517_All	449	T	K	99	T	37	164	172	G	36	91	91	330	6.1416e-05	1.04848	0	14
Unigene16517_All	534	T	W	99	A	32	227	227	T	31	28	28	869	0.0332941	1	0	23
Unigene16517_All	566	C	Y	99	C	37	218	218	T	37	37	37	889	0.324331	1	0	7
Unigene16517_All	629	C	M	99	C	36	208	208	A	37	47	47	752	0.0802168	1	0	8
Unigene16517_All	666	A	R	83	A	34	236	236	G	32	19	19	634	0.253207	1	0	34
Unigene16517_All	700	A	R	99	G	35	156	156	A	35	98	98	639	0.0862684	1	0	6
Unigene16517_All	706	T	Y	99	T	35	208	208	C	37	47	47	567	9.32278e-05	1	0	6
Unigene16517_All	822	A	R	99	A	37	164	164	G	37	91	91	272	0.118232	1	0	35
Unigene16517_All	857	A	W	99	A	34	156	156	T	36	31	31	187	0.0473418	1	0	10
Unigene16517_All	867	G	S	99	G	36	59	59	C	36	26	26	85	0.201994	1	0	10
Unigene16518_All	115	C	Y	99	C	38	50	50	T	35	25	25	75	0.000961248	1	0	18
Unigene16518_All	294	A	W	99	A	37	19	19	T	34	16	16	35	0.108672	1	0	15
Unigene16518_All	309	T	W	99	T	37	14	14	A	38	12	12	26	0.187198	1	0	15
Unigene16519_All	189	A	M	50	A	33	16	16	C	29	7	7	23	0.692291	1	0	52
Unigene16519_All	241	G	R	99	G	34	30	30	A	33	10	10	40	0.274173	1	0	33
Unigene16519_All	274	C	S	99	C	35	26	26	G	32	15	15	41	0.522725	1	0	33
Unigene16519_All	383	A	R	45	A	30	67	67	G	34	9	9	76	0.0653721	1	0	109
Unigene16520_All	291	C	T	56	T	34	22	22	C	0	0	0	22	1	1	0	59
Unigene16520_All	350	A	R	51	G	31	11	11	A	36	5	5	16	0.159799	1	0	59
Unigene16521_All	324	G	S	99	G	34	29	29	C	34	11	11	40	0.663558	1	0	100
Unigene16521_All	424	G	R	99	G	34	19	19	A	36	9	9	28	0.702338	1	0	100
Unigene16522_All	377	C	S	99	C	35	14	14	G	34	11	11	25	0.733941	1	0	117
Unigene16522_All	494	T	W	83	T	32	9	9	A	36	5	5	14	0.55994	1	0	54
Unigene16523_All	322	G	R	99	G	37	55	55	A	38	21	21	76	0.0647749	1	0	574
Unigene16525_All	67	A	R	39	A	36	15	15	G	37	5	5	20	0.276574	1	0	93
Unigene16525_All	256	A	M	99	A	36	59	59	C	34	17	17	77	0.0610923	1	0	96
Unigene16526_All	52	G	R	51	G	37	13	13	A	33	6	6	19	0.537944	1	0	395
Unigene16527_All	340	A	R	96	A	38	214	214	G	35	14	14	228	0.0860513	1	0	143
Unigene16529_All	135	C	M	99	C	35	15	15	A	35	12	12	27	0.72614	1	0	101
Unigene16529_All	236	C	Y	99	C	37	79	79	T	35	23	23	102	0.0592084	1	0	101
Unigene1652_All	240	C	Y	67	C	35	42	42	T	38	9	9	51	0.547394	1	0	23
Unigene1652_All	263	G	K	73	G	36	26	26	T	39	7	7	33	0.099336	1	0	23
Unigene16531_All	394	A	W	99	A	38	164	164	T	40	16	16	180	0.0166378	1	0	17
Unigene16531_All	411	A	R	99	A	38	156	156	G	39	15	15	171	0.116419	1	0	17
Unigene16532_All	578	C	A	26	A	36	10	10	C	0	0	0	10	1	1	0	20
Unigene16533_All	90	C	Y	87	C	37	15	15	T	31	10	10	25	0.500288	1	0	20
Unigene16533_All	265	A	W	99	T	35	23	23	A	36	11	11	34	0.268593	1	0	27
Unigene16533_All	392	T	C	20	C	34	8	8	T	0	0	0	8	1	1	0	17
Unigene16534_All	388	C	A	41	A	35	27	27	C	30	1	1	28	1	1	0	41
Unigene16535_All	139	C	Y	22	C	37	244	244	T	38	11	11	628	0.183903	1	0	50
Unigene16535_All	189	T	W	99	T	35	239	239	A	34	16	16	531	0.0919753	1	0	31
Unigene16535_All	220	A	W	99	A	36	61	61	T	38	19	19	80	0.0892471	1	0	31
Unigene16538_All	516	A	R	99	G	36	139	139	A	37	55	55	194	0.172387	1	0	15
Unigene16538_All	531	A	R	99	G	36	139	139	A	32	26	26	165	2.16875e-07	1	0	15
Unigene16540_All	57	C	Y	70	C	35	43	43	T	39	9	9	52	0.0105578	1	0	12
Unigene16540_All	69	T	K	51	T	37	49	49	G	35	8	8	57	0.501816	1	0	12
Unigene16540_All	294	C	Y	99	C	36	160	160	T	33	95	95	261	3.13997e-05	1	0	92
Unigene16540_All	386	A	M	99	A	33	167	167	C	36	88	88	278	3.58533e-09	1	0	53
Unigene16542_All	43	T	K	99	T	37	130	130	G	37	37	37	167	0.493082	1	0	29
Unigene16542_All	72	A	W	99	A	36	159	159	T	36	39	39	198	0.101908	1	0	7
Unigene16542_All	79	A	M	99	A	34	164	164	C	33	38	38	202	0.00998732	1	0	7
Unigene16542_All	152	G	R	99	G	35	207	207	A	35	48	48	692	0.345106	1	0	42
Unigene16542_All	194	G	R	99	G	35	126	126	A	33	129	129	794	0.0730197	1	0	42
Unigene16542_All	341	T	Y	99	C	35	225	225	T	35	30	30	478	0.139386	1	0	12
Unigene16542_All	353	G	R	30	G	35	244	244	A	36	11	11	391	0.410729	1	0	12
Unigene16542_All	377	G	R	99	G	35	206	206	A	36	49	49	303	0.0941538	1	0	24
Unigene16542_All	406	C	Y	75	C	34	202	202	T	34	11	11	213	0.35879	1	0	29
Unigene16544_All	90	G	C	38	C	36	14	14	G	0	0	0	14	1	1	0	6
Unigene16544_All	96	A	T	32	T	36	12	12	A	0	0	0	12	1	1	0	6
Unigene16544_All	275	T	Y	99	C	39	12	12	T	35	13	13	25	0.093035	1	0	179
Unigene16547_All	61	T	K	47	T	38	13	13	G	38	5	5	18	0.75	1	0	281
Unigene16547_All	342	C	Y	69	C	38	8	8	T	39	6	6	14	0.603397	1	0	281
Unigene16550_All	78	T	W	99	A	37	22	22	T	38	13	13	35	0.597286	1	0	10
Unigene16550_All	88	A	W	99	T	36	19	19	A	37	17	17	36	0.189745	1	0	10
Unigene16550_All	121	G	S	99	C	37	22	22	G	38	17	17	39	0.601949	1	0	22
Unigene16550_All	143	G	R	99	A	34	22	22	G	37	19	19	41	0.551802	1	0	13
Unigene16550_All	220	A	W	99	A	38	20	20	T	37	16	16	36	0.152455	1	0	8
Unigene16550_All	228	A	R	99	G	35	20	20	A	38	16	16	36	0.0507874	1	0	8
Unigene16550_All	422	G	R	99	A	37	15	15	G	37	7	7	22	0.391629	1	0	16
Unigene16550_All	438	C	Y	99	C	36	15	15	T	39	14	14	30	0.176777	1	0	16
Unigene16551_All	178	A	R	99	A	37	86	86	G	36	13	13	99	0.194922	1	0	15
Unigene16551_All	193	T	W	99	A	37	51	51	T	36	45	45	96	0.100712	1	0	15
Unigene16551_All	218	C	M	99	C	35	24	24	A	36	12	12	36	0.132562	1	0	25
Unigene16552_All	34	A	M	95	A	36	8	8	C	38	6	6	14	0.172494	1	0	47
Unigene16552_All	81	T	Y	99	T	35	17	17	C	39	14	14	31	0.524999	1	0	47
Unigene16552_All	192	T	Y	99	C	39	16	16	T	34	10	10	26	0.0204233	1	0	111
Unigene16554_All	93	A	T	37	T	33	24	24	A	34	1	1	25	1	1	0	71
Unigene16556_All	356	C	Y	99	C	37	225	225	T	36	30	30	342	0.488437	1	0	115
Unigene16556_All	471	G	K	99	G	38	154	154	T	37	19	19	173	0.0181989	1	0	15
Unigene16556_All	486	T	Y	99	T	37	105	105	C	37	66	66	171	0.121157	1	0	15
Unigene16557_All	192	G	R	99	G	37	30	30	A	36	12	12	42	0.185265	1	0	173
Unigene16558_All	136	G	R	98	G	37	13	13	A	38	8	8	21	0.206836	1	0	20
Unigene16558_All	156	T	W	48	T	39	16	16	A	36	5	5	21	0.119908	1	0	20
Unigene16558_All	176	G	K	99	G	38	45	45	T	39	24	24	69	0.00641839	1	0	20
Unigene16558_All	244	G	S	99	G	34	41	41	C	36	28	28	69	0.112014	1	0	43
Unigene16560_All	189	C	Y	99	C	37	199	199	T	37	29	29	228	0.186211	1	0	137
Unigene16563_All	325	G	K	99	G	38	9	9	T	34	9	9	18	0.0951255	1	0	48
Unigene16566_All	240	G	R	99	G	35	37	37	A	36	18	18	55	0.384698	1	0	8
Unigene16566_All	248	A	R	99	A	37	41	41	G	38	16	16	57	0.526155	1	0	8
Unigene16566_All	309	A	W	99	A	35	70	70	T	29	43	43	113	8.871e-05	1	0	61
Unigene16568_All	406	G	K	70	G	37	10	10	T	33	6	6	16	0.043519	1	0	66
Unigene16569_All	234	G	R	99	G	37	198	198	A	35	57	57	1065	0.0321215	1	0	27
Unigene16569_All	338	G	R	99	G	32	238	238	A	32	17	17	1733	0.323546	1	0	104
Unigene16570_All	204	T	W	99	T	33	15	15	A	37	9	9	24	0.579387	1	0	213
Unigene16570_All	417	G	S	47	G	37	14	14	C	36	5	5	19	0.310802	1	0	24
Unigene16570_All	441	G	K	49	G	35	14	14	T	35	5	5	19	0.482198	1	0	24
Unigene16572_All	36	A	W	99	A	39	12	12	T	39	8	8	20	0.455053	1	0	177
Unigene16572_All	213	G	S	99	G	28	225	225	C	29	29	29	408	0.186305	1	0	29
Unigene16572_All	270	C	Y	80	C	36	241	241	T	37	14	14	1028	0.365131	1	0	7
Unigene16572_All	277	T	K	99	T	36	227	227	G	37	28	28	1038	0.0170203	1	0	7
Unigene16572_All	410	T	Y	99	T	35	176	176	C	38	79	79	818	5.32561e-07	1	0	23
Unigene16572_All	433	G	S	84	G	37	242	242	C	36	13	13	759	0.421213	1	0	23
Unigene16573_All	166	C	M	99	A	37	8	8	C	36	7	7	15	0.231702	1	0	38
Unigene16573_All	212	T	K	63	T	37	16	16	G	35	6	6	22	0.75716	1	0	5
Unigene16573_All	230	A	R	54	A	34	15	15	G	33	6	6	21	0.742463	1	0	8
Unigene16573_All	238	C	Y	93	C	39	8	8	T	28	9	9	17	0.00123406	1	0	8
Unigene16574_All	251	G	R	92	G	32	20	20	A	29	10	10	30	0.678291	1	0	69
Unigene16574_All	320	G	R	99	G	37	32	32	A	38	31	31	63	0.656951	1	0	69
Unigene16575_All	47	T	W	99	A	37	23	23	T	38	22	22	45	0.0432711	1	0	5
Unigene16575_All	52	T	W	99	T	39	22	22	A	37	23	23	45	0.180664	1	0	5
Unigene16575_All	94	A	M	99	A	36	32	32	C	36	30	30	62	0.624297	1	0	42
Unigene16575_All	151	T	Y	99	C	34	45	45	T	33	43	43	88	0.476702	1	0	57
Unigene16575_All	223	C	M	99	C	36	72	72	A	36	59	59	131	0.460386	1	0	14
Unigene16575_All	237	G	A	99	A	34	102	102	G	0	0	0	102	1	1	0	12
Unigene16575_All	366	A	R	99	A	33	47	47	G	35	27	27	74	0.0973305	1	0	52
Unigene16577_All	250	G	R	46	G	36	14	14	A	35	5	5	19	0.249914	1	0	91
Unigene16578_All	366	G	K	99	G	34	44	44	T	36	10	10	54	0.691806	1	0	38
Unigene16578_All	404	A	R	99	A	34	54	54	G	39	14	14	68	0.00197733	1	0	38
Unigene16578_All	495	A	M	54	A	37	71	71	C	38	9	9	80	0.406713	1	0	9
Unigene16578_All	597	G	R	99	G	34	37	37	A	31	21	21	58	0.511044	1	0	22
Unigene16578_All	619	T	K	27	T	38	51	51	G	37	7	7	58	0.624251	1	0	22
Unigene1657_All	194	T	W	99	T	32	90	90	A	27	25	25	115	0.00834277	1	0	383
Unigene16580_All	168	T	Y	99	T	35	17	17	C	36	13	13	30	0.685391	1	0	391
Unigene16584_All	33	A	W	99	T	38	76	76	A	37	31	31	107	0.0547882	1	0	9
Unigene16584_All	42	A	W	99	A	38	107	107	T	38	11	11	118	0.335134	1	0	9
Unigene16584_All	67	A	W	99	T	37	175	175	A	37	80	80	266	0.222449	1	0	25
Unigene16585_All	178	T	Y	21	T	36	55	55	C	35	9	9	64	0.139741	1	0	33
Unigene16586_All	220	C	M	99	C	36	30	30	A	35	19	19	49	0.541897	1	0	150
Unigene16587_All	400	T	Y	49	T	38	20	20	C	39	6	6	26	0.121248	1	0	634
Unigene16589_All	85	G	R	99	G	32	202	202	A	34	53	53	1573	0.00166956	1	0	80
Unigene16589_All	421	G	R	56	G	31	241	241	A	32	13	13	5310	0.0575779	1	0	42
Unigene16592_All	88	G	R	99	G	37	22	22	A	37	19	19	41	0.42312	1	0	13
Unigene16592_All	114	G	K	99	G	35	113	113	T	34	26	26	139	0.439894	1	0	13
Unigene16592_All	188	G	K	99	T	36	93	93	G	33	58	58	151	0.211978	1	0	12
Unigene16592_All	227	T	W	99	A	32	142	142	T	36	16	16	158	0.0253604	1	0	24
Unigene16592_All	290	T	Y	99	T	37	120	120	C	37	43	43	163	0.162379	1	0	63
Unigene16592_All	374	G	S	99	G	35	34	34	C	33	20	20	55	0.63793	1	0	35
Unigene16595_All	122	G	R	99	G	35	28	28	A	31	15	15	43	0.537875	1	0	166
Unigene16595_All	288	C	M	60	C	34	121	121	A	31	9	9	130	0.198117	1	0	30
Unigene16595_All	318	T	Y	99	T	31	64	64	C	33	52	52	116	0.256211	1	0	30
Unigene16595_All	433	G	S	99	G	37	15	15	C	37	15	15	30	0.0803427	1	0	115
Unigene16596_All	165	C	S	99	C	38	15	15	G	37	11	11	26	0.165088	1	0	431
Unigene16598_All	250	C	Y	99	T	35	7	7	C	38	6	6	13	0.611305	1	0	11
Unigene16599_All	439	T	W	67	T	36	9	9	A	32	5	5	14	0.449051	1	0	9
Unigene1659_All	245	T	K	99	G	39	11	11	T	38	8	8	19	0.664351	1	0	141
Unigene165_All	1265	A	M	97	A	31	13	13	C	34	7	7	20	0.321324	1	0	61
Unigene165_All	1326	A	R	99	G	37	12	12	A	38	11	11	23	0.262699	1	0	61
Unigene165_All	1426	C	M	23	C	38	29	29	A	37	5	5	34	0.253809	1	0	40
Unigene165_All	1466	A	W	99	A	37	39	39	T	38	16	16	55	0.719036	1	0	40
Unigene165_All	1717	G	R	99	A	38	21	21	G	36	7	7	28	0.608733	1	0	251
Unigene16600_All	223	G	R	99	G	32	162	162	A	33	93	93	358	0.1816	1	0	63
Unigene16600_All	286	C	Y	99	C	37	168	168	T	36	87	87	734	0.0857649	1	0	63
Unigene16600_All	406	T	W	99	T	37	94	94	A	37	33	33	127	0.0146377	1	0	7
Unigene16604_All	227	A	R	43	A	31	11	11	G	38	6	6	17	0.0491273	1	0	18
Unigene16604_All	245	C	Y	61	C	37	11	11	T	38	7	7	18	0.164153	1	0	18
Unigene16605_All	210	G	S	99	G	37	42	42	C	35	26	26	68	0.402807	1	0	463
Unigene16606_All	197	C	Y	21	C	33	75	75	T	33	7	7	83	0.324067	1	0	101
Unigene16606_All	298	G	K	62	G	37	71	71	T	36	9	9	80	0.209833	1	0	22
Unigene16606_All	320	G	R	58	G	37	68	68	A	37	10	10	78	0.18894	1	0	22
Unigene16606_All	371	A	W	34	A	32	59	59	T	29	8	8	68	0.280931	1	0	13
Unigene16606_All	410	C	S	99	C	37	11	11	G	34	7	7	18	0.517314	1	0	39
Unigene16607_All	100	C	Y	29	C	32	61	61	T	28	11	11	72	0.0447317	1	0	102
Unigene16607_All	202	C	Y	99	T	35	42	42	C	37	17	17	59	0.256088	1	0	43
Unigene16607_All	245	A	R	95	A	35	14	14	G	35	7	7	21	0.485509	1	0	43
Unigene16611_All	146	G	R	99	A	37	13	13	G	36	9	9	22	0.300263	1	0	30
Unigene16611_All	176	A	R	99	G	35	20	20	A	37	7	7	27	0.170547	1	0	30
Unigene16613_All	329	T	W	81	A	32	121	121	T	29	124	124	2121	5.55745e-07	1	0	16
Unigene16615_All	80	G	R	22	G	36	47	47	A	38	7	7	54	0.247541	1	0	21
Unigene16615_All	101	T	Y	21	T	35	45	45	C	35	6	6	51	0.664581	1	0	5
Unigene16615_All	106	G	R	99	A	36	30	30	G	31	13	13	43	0.260928	1	0	5
Unigene16615_All	121	T	Y	99	C	34	27	27	T	35	14	14	41	0.621993	1	0	15
Unigene16615_All	299	C	Y	21	C	38	56	56	T	39	6	6	62	0.692909	1	0	36
Unigene16615_All	335	A	R	85	A	37	52	52	G	37	10	10	62	0.503758	1	0	8
Unigene16617_All	62	A	R	44	A	38	9	9	G	37	6	6	15	0.264336	1	0	143
Unigene16617_All	205	A	W	43	A	36	20	20	T	38	5	5	25	0.358649	1	0	143
Unigene16618_All	22	A	R	99	A	36	186	186	G	39	69	69	807	0.000126706	1	0	16
Unigene16618_All	41	A	W	99	A	37	202	202	T	38	53	53	1493	0.00882573	1	0	19
Unigene16618_All	111	A	R	99	A	31	142	142	G	33	110	110	5589	1.6333e-06	1	0	13
Unigene16618_All	124	C	Y	99	C	31	185	185	T	29	69	69	5842	0.384835	1	0	7
Unigene16618_All	136	G	R	99	G	30	222	222	A	29	33	33	5570	0.212417	1	0	5
Unigene16618_All	259	G	R	31	G	29	241	241	A	24	13	13	4150	0.0826494	1	0	6
Unigene16618_All	265	G	K	99	G	32	212	212	T	31	43	43	3871	0.361339	1	0	6
Unigene16618_All	280	G	R	99	G	33	195	195	A	34	60	60	3179	0.244923	1	0	15
Unigene16618_All	348	C	Y	99	C	36	200	200	T	36	55	55	383	0.209792	1	0	14
Unigene16620_All	267	A	R	99	A	35	212	212	G	32	41	41	358	0.178248	1	0	33
Unigene16620_All	377	T	Y	99	T	35	96	96	C	35	51	51	150	0.241979	1	0	10
Unigene16620_All	387	G	R	46	G	34	95	95	A	30	10	10	105	0.158936	1	0	10
Unigene16624_All	204	G	R	99	G	38	63	63	A	37	15	15	78	0.0844734	1	0	574
Unigene16625_All	265	G	R	99	G	34	66	66	A	30	15	15	81	0.0124428	1	0	119
Unigene16626_All	197	A	W	99	A	33	13	13	T	36	8	8	21	0.0520959	1	0	61
Unigene16626_All	258	C	Y	99	C	37	36	36	T	38	17	17	53	0.535219	1	0	61
Unigene16626_All	384	G	R	99	G	34	48	48	A	29	16	16	64	0.00349048	1	0	21
Unigene16626_All	405	G	R	99	G	34	37	37	A	38	20	20	57	0.0297645	1	0	21
Unigene16628_All	203	A	R	99	G	37	68	68	A	36	9	9	77	0.35768	1	0	28
Unigene16628_All	231	A	M	28	A	38	69	69	C	39	7	7	76	0.0716024	1	0	6
Unigene16628_All	237	A	R	31	A	35	71	71	G	38	8	8	79	0.00690867	1	0	6
Unigene16629_All	247	T	W	99	A	39	6	6	T	40	5	5	11	0.465368	1	0	57
Unigene16634_All	151	G	R	99	G	35	29	29	A	36	18	18	48	0.71774	1	0	219
Unigene16634_All	370	C	Y	99	C	34	28	28	T	33	13	13	41	0.304338	1	0	219
Unigene16636_All	25	G	R	99	A	36	54	54	G	38	18	18	72	0.241263	1	0	45
Unigene16636_All	70	A	R	99	A	34	83	83	G	35	37	37	120	0.462648	1	0	45
Unigene16636_All	274	T	W	99	T	32	15	15	A	35	7	7	22	0.0455425	1	0	53
Unigene16638_All	287	C	M	45	C	36	14	14	A	36	5	5	19	0.446594	1	0	6
Unigene16639_All	299	A	R	38	A	34	6	6	G	34	5	5	11	0.534632	1	0	57
Unigene16640_All	53	C	M	99	C	37	104	104	A	37	22	22	126	0.175717	1	0	311
Unigene16641_All	619	A	R	33	A	32	12	12	G	36	5	5	17	0.0408856	1	0	5
Unigene16641_All	624	A	M	95	A	34	12	12	C	37	6	6	18	0.520766	1	0	5
Unigene16642_All	238	A	R	99	A	38	45	45	G	36	11	11	56	0.631963	1	0	174
Unigene16643_All	290	C	M	99	C	38	49	49	A	38	19	19	68	0.475479	1	0	85
Unigene16645_All	107	T	Y	99	T	37	21	21	C	36	20	20	42	0.280603	1	0	8
Unigene16645_All	115	A	R	99	G	37	34	34	A	38	12	12	48	0.670933	1	0	8
Unigene16645_All	278	T	Y	65	T	33	21	21	C	35	7	7	28	0.173884	1	0	73
Unigene16647_All	68	T	K	99	T	37	8	8	G	32	8	8	16	0.286869	1	0	133
Unigene16647_All	201	G	A	67	A	33	31	31	G	0	0	0	31	1	1	0	133
Unigene16650_All	154	T	W	99	T	31	141	141	A	30	113	113	4199	0.00776512	1	0	149
Unigene16654_All	259	A	W	74	A	34	44	44	T	35	7	7	51	0.694638	1	0	58
Unigene16654_All	317	T	Y	99	T	32	38	38	C	32	15	15	53	0.549548	1	0	28
Unigene16654_All	345	A	M	96	A	37	31	31	C	36	9	9	41	0.375142	1	0	28
Unigene16656_All	325	C	Y	99	C	35	139	139	T	38	21	21	160	0.0254076	1	0	63
Unigene16656_All	388	G	S	61	C	33	89	89	G	29	9	9	98	0.0576759	1	0	14
Unigene16656_All	410	T	Y	35	T	35	109	109	C	36	7	7	116	0.311096	1	0	8
Unigene16656_All	445	G	S	99	G	37	104	104	C	39	11	11	115	0.0184308	1	0	20
Unigene16657_All	50	C	T	29	T	37	32	32	C	40	2	2	34	1	1	0	12
Unigene16657_All	62	T	Y	99	C	36	20	20	T	39	14	14	34	0.500379	1	0	12
Unigene1665_All	270	G	R	99	G	36	10	10	A	35	10	10	20	0.632212	1	0	364
Unigene16661_All	83	A	W	99	T	35	56	56	A	37	32	32	88	0.0973527	1	0	19
Unigene16661_All	177	G	K	99	T	36	84	84	G	36	66	66	150	0.414569	1	0	9
Unigene16661_All	186	A	R	72	A	35	157	157	G	36	11	11	168	0.220812	1	0	9
Unigene16663_All	298	A	R	99	A	36	39	39	G	34	16	16	55	0.0816856	1	0	46
Unigene16663_All	344	T	W	99	T	38	34	34	A	32	11	11	45	0.00302485	1	0	46
Unigene16665_All	142	C	Y	99	C	34	73	73	T	35	18	18	91	0.415192	1	0	413
Unigene16666_All	63	C	Y	37	C	36	15	15	T	39	5	5	20	0.520156	1	0	42
Unigene16666_All	105	T	K	93	T	36	38	38	G	36	10	10	49	0.634929	1	0	21
Unigene16666_All	126	T	Y	54	T	34	40	40	C	37	7	7	47	0.609193	1	0	21
Unigene16666_All	369	C	Y	55	C	37	9	9	T	39	5	5	14	0.259241	1	0	87
Unigene16668_All	37	C	M	64	C	38	51	51	A	38	8	8	59	0.327922	1	0	242
Unigene16668_All	324	C	Y	93	T	33	8	8	C	32	5	5	13	0.708236	1	0	45
Unigene16669_All	422	A	W	72	A	36	18	18	T	37	6	6	25	0.336459	1	0	17
Unigene16669_All	439	C	M	60	C	35	18	18	A	38	5	5	24	0.60082	1	0	17
Unigene16669_All	570	A	R	55	A	36	5	5	G	34	5	5	10	0.345238	1	0	131
Unigene1666_All	116	T	Y	32	T	36	21	21	C	36	5	5	26	0.400517	1	0	364
Unigene16670_All	113	G	S	99	C	38	7	7	G	29	6	6	13	0.50204	1	0	18
Unigene16670_All	239	T	A	62	A	32	26	26	T	0	0	0	26	1	1	0	12
Unigene16670_All	251	G	S	68	G	31	18	18	C	29	7	7	25	0.0550364	1	0	12
Unigene16670_All	303	T	Y	99	T	33	10	10	C	35	9	9	21	0.33036	1	0	52
Unigene16671_All	286	T	Y	99	T	37	191	191	C	37	63	63	1158	0.0250686	1	0	11
Unigene16671_All	307	T	W	22	T	37	245	245	A	33	10	10	1470	0.0542149	1	0	8
Unigene16671_All	351	T	Y	58	T	23	235	235	C	25	16	16	1854	0.330148	1	0	24
Unigene16671_All	375	C	Y	99	C	30	236	236	T	31	18	18	1693	0.362742	1	0	24
Unigene16671_All	429	C	Y	63	C	34	240	240	T	29	15	15	2482	0.0400511	1	0	21
Unigene16671_All	583	C	M	86	C	37	243	243	A	39	12	12	391	0.197666	1	0	53
Unigene16674_All	159	C	S	75	C	35	41	41	G	36	10	10	52	0.283319	1	0	29
Unigene16674_All	231	T	Y	72	T	36	29	29	C	37	9	9	38	0.641448	1	0	72
Unigene16676_All	223	A	M	99	A	36	114	114	C	35	34	34	148	0.170373	1	0	377
Unigene16679_All	185	G	R	99	G	38	40	40	A	37	36	36	76	0.254435	1	0	515
Unigene16683_All	163	G	S	99	G	37	52	52	C	37	19	19	71	0.458622	1	0	30
Unigene16683_All	193	C	Y	46	C	37	61	61	T	35	10	10	71	0.0930243	1	0	7
Unigene16683_All	200	T	W	99	T	36	56	56	A	37	18	18	74	0.182173	1	0	7
Unigene16683_All	263	T	Y	56	T	37	52	52	C	34	12	12	64	0.285147	1	0	21
Unigene16683_All	322	A	W	75	A	34	26	26	T	39	8	8	34	0.242493	1	0	19
Unigene16685_All	179	T	Y	99	C	36	98	98	T	35	32	32	130	0.0657907	1	0	6
Unigene16685_All	185	C	Y	99	T	36	104	104	C	34	34	34	139	0.100751	1	0	6
Unigene16685_All	205	T	W	99	T	33	121	121	A	30	14	14	136	0.170381	1	0	20
Unigene16685_All	270	T	W	99	T	35	88	88	A	33	30	30	118	0.420403	1	0	65
Unigene16686_All	171	T	Y	61	C	38	14	14	T	38	5	5	19	0.221964	1	0	34
Unigene16689_All	232	G	K	99	G	37	7	7	T	36	7	7	14	0.450758	1	0	102
Unigene16690_All	216	G	R	99	G	35	124	124	A	34	17	17	142	0.44586	1	0	348
Unigene16693_All	130	T	Y	99	T	39	169	169	C	38	86	86	292	0.0291285	1	0	11
Unigene16693_All	141	A	M	99	A	38	224	224	C	37	31	31	307	0.185723	1	0	5
Unigene16693_All	146	T	Y	99	T	38	174	174	C	37	80	80	398	0.0626969	1	0	5
Unigene16693_All	154	T	Y	75	T	37	240	240	C	35	15	15	1687	0.187357	1	0	8
Unigene16693_All	162	A	R	99	A	36	219	219	G	37	36	36	1890	0.0243383	1	0	8
Unigene16693_All	191	C	Y	99	C	32	217	217	T	33	37	37	3229	0.345223	1	0	6
Unigene16693_All	231	G	K	99	T	32	173	173	G	28	81	81	4181	1.60579e-09	1	0	24
Unigene16693_All	255	G	R	50	G	29	239	239	A	32	15	15	3280	0.0237499	1	0	24
Unigene16694_All	47	A	R	99	G	34	8	8	A	24	11	11	19	0.515506	1	0	22
Unigene16695_All	104	C	Y	21	C	33	131	131	T	34	9	9	140	0.299179	1	0	21
Unigene16695_All	204	G	R	99	G	36	189	189	A	38	66	66	352	0.061057	1	0	47
Unigene16696_All	380	C	Y	87	T	30	13	13	C	34	6	6	19	0.319401	1	0	137
Unigene16696_All	517	A	M	99	C	34	9	9	A	36	5	5	14	0.218781	1	0	13
Unigene16696_All	550	C	Y	82	T	35	13	13	C	34	6	6	19	0.260688	1	0	20
Unigene16697_All	220	C	S	99	C	37	25	25	G	36	16	16	41	0.680328	1	0	15
Unigene16697_All	235	C	Y	43	C	37	56	56	T	35	9	9	65	0.054253	1	0	15
Unigene16697_All	294	C	S	99	C	36	54	54	G	36	20	20	74	0.451562	1	0	53
Unigene16697_All	378	C	Y	99	C	33	31	31	T	31	18	18	49	0.542371	1	0	30
Unigene16698_All	23	T	W	99	T	36	102	102	A	37	40	40	142	0.173341	1	0	12
Unigene16698_All	143	C	Y	99	C	35	216	216	T	35	38	38	789	0.387846	1	0	40
Unigene16698_All	183	G	R	99	G	35	157	157	A	35	78	78	1067	0.118429	1	0	40
Unigene16698_All	266	G	R	99	G	34	178	178	A	34	77	77	662	0.498156	1	0	83
Unigene16698_All	350	C	Y	78	T	37	106	106	C	34	17	17	123	0.00425856	1	0	84
Unigene1669_All	57	A	R	61	A	33	24	24	G	38	6	6	30	0.148115	1	0	218
Unigene166_All	79	T	K	80	T	35	9	9	G	35	6	6	15	0.477323	1	0	32
Unigene166_All	111	G	R	99	G	36	18	18	A	35	12	12	31	0.458528	1	0	32
Unigene166_All	433	A	R	99	A	37	175	175	G	36	80	80	332	0.14763	1	0	289
Unigene166_All	880	T	Y	84	T	35	9	9	C	35	6	6	15	0.477323	1	0	174
Unigene166_All	1054	C	Y	99	C	33	45	45	T	27	18	18	64	0.50357	1	0	72
Unigene166_All	1126	C	M	99	A	34	42	42	C	36	18	18	60	0.55334	1	0	24
Unigene166_All	1150	G	R	99	G	36	36	36	A	33	26	26	63	0.567774	1	0	24
Unigene166_All	1213	G	K	59	G	34	9	9	T	23	6	6	15	0.516583	1	0	9
Unigene166_All	1228	A	W	98	A	31	9	9	T	34	6	6	15	0.227972	1	0	6
Unigene16700_All	145	G	S	96	G	34	7	7	C	37	5	5	12	0.215909	1	0	46
Unigene16704_All	91	A	M	55	A	37	19	19	C	38	5	5	24	0.339639	1	0	37
Unigene16704_All	134	G	S	99	C	32	14	14	G	30	14	14	28	0.606847	1	0	43
Unigene16704_All	282	T	W	99	A	37	13	13	T	35	7	7	20	0.321324	1	0	6
Unigene16704_All	288	C	M	99	C	34	12	12	A	36	8	8	20	0.65597	1	0	6
Unigene16708_All	235	C	Y	99	C	38	193	193	T	39	62	62	359	0.000509029	1	0	546
Unigene16712_All	39	T	Y	80	T	36	35	39	C	34	11	11	51	0.0499153	1.19608	0	89
Unigene16712_All	128	T	W	99	T	34	38	43	A	32	20	22	65	0.557853	1.18462	0	34
Unigene16712_All	300	C	M	99	A	37	10	10	C	37	9	9	19	0.200091	1	0	29
Unigene16712_All	329	C	Y	99	C	34	13	13	T	30	12	12	25	0.234797	1	0	23
Unigene16712_All	352	T	Y	52	T	35	10	10	C	39	5	5	15	0.541126	1	0	12
Unigene16712_All	364	C	Y	57	C	37	14	14	T	35	6	6	20	0.577967	1	0	12
Unigene16712_All	390	T	Y	99	T	33	13	13	C	35	11	11	24	0.345256	1	0	26
Unigene16712_All	422	G	R	99	G	36	12	12	A	36	9	9	21	0.638448	1	0	13
Unigene16712_All	435	C	M	99	A	39	9	9	C	36	9	9	18	0.533978	1	0	13
Unigene16713_All	274	T	Y	99	C	32	167	167	T	34	70	70	237	1.92676e-05	1	0	8
Unigene16713_All	392	C	S	99	C	34	204	204	G	34	51	51	307	0.349632	1	0	16
Unigene16713_All	424	A	R	43	A	37	5	5	G	30	5	5	10	0.154762	1	0	16
Unigene16716_All	180	G	R	45	G	31	22	22	A	36	6	6	28	0.0968281	1	0	21
Unigene16716_All	250	T	Y	99	T	36	17	17	C	34	13	13	30	0.570296	1	0	70
Unigene16718_All	121	A	W	68	A	29	232	232	T	30	22	22	2383	0.452265	1	0	18
Unigene16718_All	166	C	Y	99	C	34	211	211	T	35	44	44	2505	0.409796	1	0	33
Unigene16718_All	199	G	R	99	G	37	179	179	A	37	75	75	2977	0.0169894	1	0	18
Unigene16718_All	217	G	K	99	G	37	196	196	T	37	57	57	3071	0.430217	1	0	18
Unigene16718_All	342	T	Y	59	T	38	244	244	C	37	10	10	295	0.159407	1	0	27
Unigene16718_All	369	T	Y	99	T	36	228	228	C	34	27	27	282	6.15985e-05	1	0	6
Unigene16718_All	375	G	R	99	G	38	210	210	A	38	27	27	237	0.188705	1	0	6
Unigene1671_All	111	T	Y	89	C	31	7	7	T	32	6	6	13	0.365385	1	0	5
Unigene16720_All	1066	C	Y	52	C	36	9	9	T	32	5	5	14	0.398601	1	0	65
Unigene16720_All	1197	C	Y	57	C	35	9	9	T	38	5	5	14	0.651598	1	0	66
Unigene16721_All	249	C	M	94	A	32	6	6	C	36	5	5	11	0.0151515	1	0	81
Unigene16721_All	330	T	Y	99	C	37	8	8	T	31	7	7	15	0.26791	1	0	81
Unigene16721_All	813	C	Y	83	C	36	71	71	T	34	12	12	83	0.027246	1	0	30
Unigene16721_All	843	G	R	99	A	37	79	79	G	37	48	48	127	0.473241	1	0	30
Unigene16721_All	876	A	R	99	G	36	63	63	A	34	42	42	105	0.0119134	1	0	33
Unigene16721_All	921	G	R	99	G	34	138	138	A	33	20	20	158	0.0568429	1	0	45
Unigene16721_All	987	G	R	99	A	36	155	155	G	36	100	100	289	0.317172	1	0	12
Unigene16721_All	999	G	R	36	G	35	242	242	A	30	13	13	291	0.0823233	1	0	12
Unigene16721_All	1053	G	R	99	A	37	140	140	G	36	115	115	275	0.105829	1	0	54
Unigene16721_All	1132	C	M	99	C	35	241	241	A	36	12	12	254	0.285747	1	0	7
Unigene16721_All	1139	A	R	99	A	37	218	218	G	36	37	37	259	0.371967	1	0	7
Unigene16721_All	1173	T	Y	99	C	37	146	146	T	38	107	107	253	0.0167896	1	0	34
Unigene16721_All	1605	T	Y	99	C	35	39	39	T	34	19	19	58	0.740181	1	0	138
Unigene16721_All	2177	T	Y	94	T	34	15	15	C	39	9	9	24	0.0542285	1	0	62
Unigene16721_All	2239	C	M	99	C	36	25	25	A	34	20	20	45	0.660701	1	0	62
Unigene16721_All	2326	G	S	99	G	36	52	52	C	36	40	40	92	0.0758617	1	0	7
Unigene16721_All	2333	G	R	99	G	37	54	54	A	37	38	38	92	0.340042	1	0	7
Unigene16721_All	2345	C	Y	99	C	38	56	56	T	36	41	41	97	0.0161882	1	0	12
Unigene16721_All	2424	C	Y	99	C	35	114	114	T	38	13	13	127	0.0105404	1	0	72
Unigene16721_All	2496	T	K	99	T	29	68	68	G	32	52	52	134	0.276542	1	0	72
Unigene16721_All	2726	A	R	99	A	38	221	221	G	37	34	34	322	0.0327352	1	0	43
Unigene16721_All	2769	G	R	99	G	36	155	155	A	37	100	100	335	0.0161126	1	0	43
Unigene16721_All	2874	A	R	99	A	37	95	95	G	38	65	65	161	0.353104	1	0	105
Unigene16721_All	3147	G	R	99	G	36	50	50	A	35	26	26	76	0.0474874	1	0	19
Unigene16721_All	3166	A	M	99	C	36	37	37	A	34	27	27	65	0.0719572	1	0	18
Unigene16721_All	3184	T	W	99	T	36	35	35	A	33	29	29	64	0.0142054	1	0	18
Unigene16721_All	3420	T	Y	99	T	35	13	13	C	34	13	13	26	0.653467	1	0	105
Unigene16721_All	3525	T	W	83	T	34	10	10	A	39	6	6	16	0.0902847	1	0	9
Unigene16721_All	4266	A	R	90	G	30	11	11	A	37	6	6	17	0.00727214	1	0	74
Unigene16721_All	4340	C	Y	99	C	37	12	12	T	37	10	10	22	0.730717	1	0	74
Unigene16721_All	4518	G	R	99	A	36	24	24	G	38	20	20	44	0.679397	1	0	114
Unigene16721_All	4632	A	R	99	A	36	32	32	G	35	30	30	62	0.161545	1	0	63
Unigene16721_All	4695	A	R	99	A	28	27	27	G	32	23	23	50	0.504152	1	0	63
Unigene16723_All	1090	A	G	23	G	34	9	9	A	0	0	0	9	1	1	0	27
Unigene16723_All	1825	A	R	99	G	34	17	17	A	32	18	18	35	0.571845	1	0	6
Unigene16723_All	1945	C	M	99	A	34	8	8	C	34	6	6	14	0.245421	1	0	21
Unigene16724_All	782	A	R	88	G	33	9	9	A	37	6	6	15	0.264336	1	0	8
Unigene16724_All	965	C	M	99	A	35	7	7	C	37	6	6	13	0.558566	1	0	27
Unigene16724_All	1250	C	M	99	C	39	7	7	A	37	6	6	13	0.147436	1	0	47
Unigene16724_All	1297	T	Y	99	C	37	8	8	T	38	7	7	15	0.615851	1	0	18
Unigene16724_All	1315	T	Y	89	T	29	27	27	C	33	9	9	37	0.536541	1	0	18
Unigene16724_All	1342	C	Y	20	C	34	32	32	T	35	6	6	39	0.430337	1	0	27
Unigene16724_All	1397	T	W	99	T	35	15	15	A	31	14	14	29	0.686798	1	0	42
Unigene16724_All	1439	A	W	99	A	37	32	32	T	39	9	9	41	0.134335	1	0	42
Unigene16724_All	1534	A	G	32	G	37	21	21	A	30	1	1	22	1	1	0	23
Unigene16724_All	1749	T	W	36	A	37	3	19	T	28	2	39	59	0.1	1.89831	0	142
Unigene16725_All	161	A	R	50	A	32	17	17	G	30	6	6	23	0.629053	1	0	6
Unigene16725_All	167	T	Y	99	T	33	15	15	C	36	8	8	23	0.658881	1	0	6
Unigene16725_All	177	G	S	99	G	31	15	15	C	38	8	8	23	0.119101	1	0	10
Unigene16725_All	558	C	Y	99	T	29	23	23	C	33	16	16	39	0.210142	1	0	30
Unigene16725_All	615	G	K	99	G	32	12	12	T	34	9	9	21	0.715517	1	0	15
Unigene16725_All	631	T	W	99	A	35	8	8	T	34	7	7	15	0.694716	1	0	12
Unigene16725_All	657	A	W	99	A	36	17	17	T	31	9	9	26	0.549996	1	0	10
Unigene16725_All	743	T	Y	99	C	38	27	27	T	38	13	13	40	0.590047	1	0	63
Unigene16725_All	840	G	R	99	G	38	28	28	A	35	12	12	40	0.0322736	1	0	22
Unigene16725_All	862	A	M	99	C	36	38	38	A	36	17	17	55	0.232247	1	0	22
Unigene16725_All	1101	C	Y	99	T	37	31	31	C	37	23	23	54	0.624568	1	0	36
Unigene16725_All	1137	C	Y	99	T	30	32	32	C	34	22	22	54	0.0398862	1	0	36
Unigene16725_All	1182	A	R	99	A	36	40	40	G	38	12	12	52	0.73932	1	0	45
Unigene16725_All	1380	G	R	99	G	36	166	166	A	36	37	37	203	0.467319	1	0	36
Unigene16725_All	1416	A	R	99	A	38	165	165	G	37	83	83	249	0.0106223	1	0	18
Unigene16725_All	1434	A	R	99	G	36	151	151	A	36	104	104	293	0.129257	1	0	18
Unigene16725_All	1653	A	R	26	A	37	129	129	G	37	9	9	138	0.368321	1	0	31
Unigene16725_All	1684	T	Y	99	T	37	89	89	C	37	47	47	136	0.395348	1	0	11
Unigene16726_All	280	A	R	99	G	36	9	9	A	33	9	9	18	0.519251	1	0	196
Unigene16726_All	572	A	M	42	A	34	6	6	C	39	5	5	11	0.0021645	1	0	12
Unigene16726_All	691	C	A	25	A	35	10	10	C	0	0	0	10	1	1	0	23
Unigene16726_All	902	C	M	99	A	36	8	8	C	36	6	6	14	0.28638	1	0	24
Unigene16726_All	993	A	R	99	A	33	14	14	G	37	8	8	22	0.514843	1	0	41
Unigene16726_All	1034	A	R	99	A	35	17	17	G	37	11	11	28	0.530479	1	0	19
Unigene16726_All	1125	C	Y	63	C	33	21	21	T	33	7	7	28	0.479342	1	0	14
Unigene16726_All	1922	G	R	99	A	36	14	14	G	36	8	8	22	0.48669	1	0	143
Unigene16726_All	2152	C	T	41	T	37	15	15	C	0	0	0	15	1	1	0	10
Unigene16726_All	2275	G	A	47	A	35	19	19	G	0	0	0	19	1	1	0	44
Unigene16726_All	2319	A	R	99	A	37	21	21	G	36	10	10	31	0.116417	1	0	44
Unigene16726_All	2374	A	R	99	G	33	22	22	A	36	18	18	40	0.542916	1	0	55
Unigene16726_All	2858	C	Y	99	T	36	42	42	C	34	21	21	63	0.269242	1	0	35
Unigene16726_All	2893	A	R	99	G	34	41	41	A	35	30	30	72	0.257243	1	0	35
Unigene16726_All	2935	A	W	99	A	27	17	17	T	23	17	17	34	0.545394	1	0	24
Unigene16726_All	2959	A	R	99	G	34	34	34	A	34	28	28	62	0.344467	1	0	21
Unigene16726_All	2980	T	Y	99	C	34	34	34	T	36	28	28	62	0.559862	1	0	21
Unigene1672_All	51	C	S	78	C	38	237	237	G	38	18	18	1123	0.348456	1	0	93
Unigene16730_All	1216	A	R	99	A	37	32	32	G	36	20	20	52	0.284726	1	0	66
Unigene16730_All	1282	C	S	99	G	36	14	14	C	30	13	13	27	0.0925924	1	0	66
Unigene16730_All	1555	T	A	24	A	34	9	9	C	21	1	1	10	1	1	0	273
Unigene16730_All	2649	C	M	99	C	36	20	20	A	37	8	8	28	0.411346	1	0	92
Unigene16730_All	2741	A	R	86	A	35	52	52	G	34	13	13	65	0.123799	1	0	16
Unigene16730_All	2757	A	R	80	A	35	60	60	G	35	10	10	70	0.493305	1	0	16
Unigene16730_All	2836	A	R	99	A	33	53	53	G	34	24	24	77	0.48684	1	0	66
Unigene16730_All	2902	C	Y	99	C	35	35	35	T	34	17	17	52	0.723123	1	0	18
Unigene16730_All	2920	T	W	99	T	34	60	60	A	33	32	32	92	0.328998	1	0	15
Unigene16730_All	2935	A	R	99	A	36	68	68	G	37	28	28	96	0.490354	1	0	15
Unigene16730_All	3593	A	W	99	A	34	67	67	T	38	41	41	109	2.05063e-07	1	0	34
Unigene16731_All	1588	G	R	99	G	37	117	117	A	37	28	28	145	0.338801	1	0	120
Unigene16731_All	3186	C	S	99	C	35	25	25	G	38	15	15	40	0.669689	1	0	453
Unigene16731_All	3639	A	R	34	A	36	21	21	G	39	5	5	26	0.55	1	0	453
Unigene16731_All	4423	A	R	99	A	36	71	71	G	35	18	18	89	0.218792	1	0	61
Unigene16731_All	4484	A	R	99	A	34	110	110	G	29	17	17	127	0.00396319	1	0	10
Unigene16731_All	4886	A	R	99	A	29	151	151	G	30	24	24	175	0.495674	1	0	388
Unigene16732_All	260	C	Y	93	T	35	10	10	C	33	6	6	16	0.640547	1	0	819
Unigene16734_All	2517	T	Y	99	T	37	39	39	C	37	17	17	56	0.169669	1	0	373
Unigene16734_All	2890	C	Y	99	T	34	10	10	C	37	8	8	18	0.0864071	1	0	78
Unigene16734_All	2968	A	R	87	A	31	7	7	G	30	6	6	13	0.52535	1	0	9
Unigene16734_All	2977	A	R	82	A	29	9	9	G	29	6	6	15	0.431968	1	0	9
Unigene16734_All	3034	G	R	57	G	35	7	7	A	35	5	5	12	0.438131	1	0	57
Unigene16735_All	680	T	Y	57	T	37	12	12	C	39	5	5	17	0.548643	1	0	845
Unigene16735_All	2464	A	R	53	A	38	11	11	G	35	6	6	17	0.0491273	1	0	81
Unigene16735_All	2545	C	M	99	A	34	15	15	C	35	10	10	25	0.73374	1	0	81
Unigene16735_All	2698	A	R	99	G	36	9	9	A	33	9	9	18	0.218141	1	0	21
Unigene16735_All	2719	T	Y	99	C	38	13	13	T	34	7	7	20	0.568731	1	0	21
Unigene16735_All	2743	A	W	99	T	37	11	11	A	36	7	7	18	0.697854	1	0	24
Unigene16736_All	1006	G	C	28	C	36	11	11	G	0	0	0	11	1	1	0	189
Unigene16737_All	738	C	M	68	C	39	6	6	A	35	5	5	11	0.164502	1	0	138
Unigene16737_All	2562	C	Y	99	C	30	12	12	T	31	10	10	22	0.361171	1	0	75
Unigene16737_All	2637	A	R	99	A	37	40	40	G	35	17	17	57	0.623628	1	0	71
Unigene16737_All	2727	G	K	99	G	36	85	85	T	36	46	46	131	0.20141	1	0	15
Unigene16737_All	2891	C	Y	35	C	35	127	127	T	36	10	10	137	0.431024	1	0	86
Unigene16737_All	2977	G	R	99	G	36	37	37	A	35	13	13	50	0.0535085	1	0	86
Unigene16737_All	3072	G	R	99	A	30	26	26	G	31	22	22	48	0.752044	1	0	95
Unigene16737_All	3303	T	W	49	T	33	89	89	A	36	8	8	97	0.092665	1	0	36
Unigene16737_All	3339	C	Y	99	C	30	76	76	T	30	39	39	115	0.154081	1	0	36
Unigene16738_All	406	G	R	99	G	35	25	25	A	37	19	19	44	0.672519	1	0	43
Unigene16738_All	449	A	R	99	A	36	34	34	G	38	16	16	50	0.0943457	1	0	43
Unigene16738_All	725	T	Y	99	T	35	13	13	C	37	8	8	21	0.530314	1	0	7
Unigene16738_All	1644	C	M	99	A	35	7	7	C	39	5	5	12	0.133838	1	0	24
Unigene16738_All	1668	A	R	67	A	37	7	7	G	38	5	5	12	0.215909	1	0	24
Unigene16738_All	1704	C	Y	87	C	32	14	14	T	34	7	7	22	0.590015	1	0	36
Unigene16738_All	1766	T	Y	41	T	37	23	23	C	35	6	6	29	0.582074	1	0	27
Unigene16738_All	1793	G	R	36	G	33	35	35	A	31	7	7	42	0.26477	1	0	27
Unigene16740_All	152	T	Y	57	T	31	19	19	C	37	6	6	25	0.505198	1	0	6
Unigene16740_All	204	T	Y	99	T	32	15	15	C	31	13	13	28	0.0259866	1	0	12
Unigene16740_All	295	G	R	99	A	34	13	13	G	33	7	7	20	0.587674	1	0	32
Unigene16740_All	455	A	R	99	A	33	7	7	G	32	7	7	15	0.355186	1	0	11
Unigene16740_All	757	C	M	59	C	34	14	14	A	36	5	5	19	0.585655	1	0	48
Unigene16740_All	890	G	R	99	A	36	23	23	G	33	13	13	36	0.290199	1	0	79
Unigene16740_All	1091	G	R	43	G	34	23	23	A	34	6	6	29	0.138874	1	0	12
Unigene16740_All	1222	T	W	39	T	35	39	39	A	37	7	7	46	0.0406187	1	0	39
Unigene16740_All	1261	C	Y	30	C	35	46	46	T	35	7	7	53	0.215622	1	0	13
Unigene16740_All	1274	C	M	79	C	34	41	41	A	37	9	9	50	0.576531	1	0	13
Unigene16740_All	1429	T	Y	32	T	37	23	23	C	36	6	6	29	0.105916	1	0	13
Unigene16740_All	1442	C	Y	54	C	34	24	24	T	36	7	7	31	0.545596	1	0	6
Unigene16740_All	1520	T	W	57	T	32	25	25	A	37	6	6	31	0.0868228	1	0	10
Unigene16740_All	1530	A	R	41	A	37	25	25	G	35	6	6	31	0.490294	1	0	10
Unigene16740_All	1553	T	Y	39	T	36	33	33	C	38	6	6	41	0.22882	1	0	23
Unigene16740_All	1745	C	Y	99	C	33	28	28	T	32	18	18	47	0.588481	1	0	22
Unigene16740_All	2102	T	W	99	T	37	59	59	A	35	35	35	94	0.318043	1	0	23
Unigene16740_All	2301	A	R	99	A	31	119	119	G	35	19	19	138	0.0102463	1	0	46
Unigene16740_All	2393	T	K	99	T	36	131	131	G	36	15	15	148	0.473021	1	0	18
Unigene16740_All	2411	T	Y	99	T	34	126	126	C	35	18	18	144	0.0739849	1	0	18
Unigene16740_All	2486	G	R	96	G	30	67	67	A	31	12	12	79	0.189158	1	0	19
Unigene16740_All	2564	T	Y	34	T	36	93	93	C	38	9	9	102	0.0784225	1	0	13
Unigene16740_All	2657	A	M	99	C	33	46	46	A	32	37	37	83	0.375973	1	0	15
Unigene16740_All	2672	G	R	44	G	35	86	86	A	32	10	10	96	0.24521	1	0	15
Unigene16740_All	2726	A	R	99	A	34	169	169	G	34	72	72	241	0.268378	1	0	24
Unigene16740_All	2750	A	W	99	A	33	232	232	T	28	23	23	296	0.0026922	1	0	9
Unigene16740_All	2759	A	R	83	A	36	242	242	G	34	13	13	313	0.0461899	1	0	9
Unigene16740_All	2786	C	Y	99	C	31	219	219	T	28	34	34	300	0.00870697	1	0	19
Unigene16740_All	2805	G	K	99	G	30	223	223	T	32	31	31	311	0.0518939	1	0	5
Unigene16740_All	2810	C	M	99	C	33	204	204	A	34	51	51	282	0.489416	1	0	5
Unigene16740_All	2822	T	Y	99	T	33	234	234	C	32	21	21	264	0.181931	1	0	9
Unigene16740_All	2831	T	Y	99	T	33	230	230	C	30	25	25	265	0.0120923	1	0	9
Unigene16740_All	2840	A	R	99	A	34	195	195	G	35	60	60	287	0.0558867	1	0	6
Unigene16740_All	2907	G	S	99	G	36	238	238	C	33	17	17	296	0.134316	1	0	8
Unigene16740_All	2933	A	R	99	A	34	226	226	G	37	29	29	259	0.00196161	1	0	15
Unigene16740_All	2957	G	R	99	G	34	223	223	A	38	32	32	629	0.00338684	1	0	15
Unigene16740_All	3110	T	Y	99	T	27	221	221	C	31	32	32	1048	0.066256	1	0	6
Unigene16740_All	3277	T	Y	99	T	28	159	159	C	32	92	92	999	0.00014567	1	0	34
Unigene16740_All	3311	G	R	99	G	28	153	153	A	28	100	100	1052	0.166903	1	0	15
Unigene16740_All	3326	T	Y	93	T	27	227	227	C	30	18	18	1085	0.26022	1	0	9
Unigene16740_All	3358	A	M	99	A	33	182	182	C	34	70	70	1132	0.262148	1	0	20
Unigene16740_All	3409	A	R	99	A	32	220	220	G	29	35	35	960	0.022366	1	0	33
Unigene16740_All	3459	G	R	99	G	33	165	165	A	35	90	90	875	0.00730234	1	0	15
Unigene16740_All	3779	C	S	99	C	31	226	226	G	35	29	29	2816	0.000199475	1	0	12
Unigene16742_All	63	A	R	72	A	39	7	7	G	36	6	6	13	0.708916	1	0	18
Unigene16742_All	149	C	Y	24	C	36	16	16	T	40	5	5	21	0.0765148	1	0	70
Unigene16742_All	219	G	K	30	G	37	39	39	T	35	7	7	46	0.191616	1	0	42
Unigene16742_All	474	A	R	98	G	36	12	12	A	38	6	6	18	0.308231	1	0	48
Unigene16742_All	522	A	R	72	A	29	20	20	G	36	7	7	27	0.0274473	1	0	48
Unigene16742_All	588	A	R	52	A	34	11	11	G	33	6	6	17	0.202165	1	0	36
Unigene16742_All	642	T	Y	99	C	37	9	9	T	38	7	7	16	0.75	1	0	18
Unigene16742_All	888	A	R	82	G	31	8	8	A	35	5	5	13	0.416472	1	0	66
Unigene16742_All	954	A	R	99	G	30	10	10	A	34	8	8	18	0.724188	1	0	66
Unigene16742_All	1125	T	K	77	T	36	8	8	G	32	5	5	13	0.60878	1	0	171
Unigene16744_All	1004	C	Y	72	C	36	21	21	T	33	10	10	31	0.704831	1	0	117
Unigene16744_All	1121	A	W	99	A	38	27	27	T	33	17	17	44	0.509302	1	0	117
Unigene16745_All	811	T	Y	99	T	38	19	19	C	39	8	8	27	0.274558	1	0	66
Unigene16745_All	958	T	Y	99	T	38	20	20	C	37	10	10	30	0.75431	1	0	37
Unigene16745_All	995	G	S	99	G	36	9	9	C	33	7	7	16	0.552622	1	0	20
Unigene16745_All	1015	T	K	82	T	38	8	8	G	35	6	6	14	0.245421	1	0	16
Unigene16745_All	1666	T	W	68	T	33	8	8	A	36	5	5	13	0.542735	1	0	36
Unigene16745_All	1843	C	Y	74	C	35	7	7	T	33	6	6	13	0.222611	1	0	9
Unigene16745_All	1852	T	K	60	T	37	6	6	G	35	5	5	11	0.582251	1	0	9
Unigene16745_All	2422	G	K	99	G	34	9	9	T	34	8	8	17	0.685747	1	0	12
Unigene16745_All	2434	A	R	55	A	33	13	13	G	32	5	5	18	0.675712	1	0	12
Unigene16746_All	524	C	M	99	C	31	14	14	A	33	9	9	23	0.672063	1	0	9
Unigene16746_All	587	A	M	37	A	36	15	15	C	34	5	5	20	0.059275	1	0	26
Unigene16746_All	717	C	Y	48	C	32	29	29	T	34	7	7	36	0.265382	1	0	20
Unigene16746_All	746	G	R	85	G	34	29	29	A	37	8	8	40	0.527403	1	0	29
Unigene16746_All	785	C	Y	76	C	27	29	29	T	32	9	9	38	0.171289	1	0	19
Unigene16746_All	804	G	K	99	G	28	25	25	T	29	13	13	38	0.45169	1	0	19
Unigene16746_All	845	G	R	35	G	32	46	46	A	35	7	7	54	0.281151	1	0	9
Unigene16746_All	880	C	Y	69	C	34	35	35	T	32	9	9	44	0.112996	1	0	22
Unigene16746_All	1004	C	Y	99	C	36	22	22	T	32	20	20	42	0.513345	1	0	14
Unigene16746_All	1018	A	R	99	A	32	29	29	G	33	10	10	39	0.334522	1	0	14
Unigene16746_All	1079	T	Y	99	T	39	54	54	C	38	36	36	90	0.491786	1	0	10
Unigene16746_All	1089	C	Y	99	C	38	65	65	T	36	44	44	109	0.0628029	1	0	9
Unigene16746_All	1098	G	K	99	G	38	72	72	T	38	49	49	121	0.305189	1	0	9
Unigene16746_All	1109	C	M	99	C	37	101	101	A	37	24	24	125	0.393761	1	0	11
Unigene16746_All	1141	C	Y	99	C	36	88	88	T	36	38	38	126	0.433511	1	0	10
Unigene16746_All	1151	A	M	99	A	35	73	73	C	35	30	30	103	0.249822	1	0	10
Unigene16746_All	1176	A	R	40	A	34	81	81	G	37	8	8	89	0.152535	1	0	6
Unigene16746_All	1184	T	K	99	T	37	63	63	G	38	15	15	78	0.0778082	1	0	8
Unigene16746_All	1234	C	Y	99	C	35	41	41	T	37	19	19	60	0.00673448	1	0	44
Unigene16746_All	1317	G	R	99	G	34	47	47	A	35	12	12	59	0.311031	1	0	31
Unigene16746_All	1355	T	Y	84	T	34	71	71	C	35	12	12	83	0.453612	1	0	7
Unigene16746_All	1368	G	R	99	G	37	87	87	A	36	12	12	99	0.0205571	1	0	13
Unigene16746_All	1391	G	R	99	G	37	85	85	A	37	35	35	120	0.431243	1	0	17
Unigene16746_All	1408	T	Y	99	T	36	85	85	C	38	22	22	107	0.293415	1	0	11
Unigene16747_All	1641	T	Y	99	C	36	8	8	T	35	6	6	14	0.737429	1	0	54
Unigene16747_All	1695	T	K	99	G	37	11	11	T	37	9	9	20	0.411878	1	0	54
Unigene16747_All	2373	C	Y	99	T	38	10	10	C	36	7	7	17	0.650221	1	0	57
Unigene16747_All	2523	T	Y	99	C	37	29	29	T	37	28	28	57	0.490525	1	0	41
Unigene16747_All	2564	A	R	99	A	37	28	28	G	31	28	28	56	0.500098	1	0	41
Unigene16747_All	2669	C	S	99	G	38	38	38	C	34	32	32	70	0.00525903	1	0	105
Unigene16747_All	2865	C	Y	99	C	33	53	53	T	33	22	22	75	0.410244	1	0	131
Unigene16747_All	2996	C	M	99	A	36	62	62	C	35	62	62	124	0.202686	1	0	131
Unigene16747_All	3404	A	R	86	A	36	107	107	G	38	14	14	121	0.225546	1	0	20
Unigene16747_All	3485	C	Y	99	T	36	50	50	C	33	37	37	87	0.00746697	1	0	16
Unigene16747_All	3523	A	W	99	A	34	54	54	T	34	32	32	86	0.223803	1	0	20
Unigene16747_All	3709	C	Y	99	C	35	28	28	T	37	26	26	54	0.0698748	1	0	173
Unigene16747_All	3882	A	W	93	A	39	6	6	T	36	5	5	11	0.544372	1	0	173
Unigene16749_All	1598	G	R	99	G	37	58	58	A	38	18	18	77	0.274695	1	0	211
Unigene16751_All	2812	C	G	26	G	32	11	11	C	0	0	0	11	1	1	0	23
Unigene16751_All	2899	G	T	30	T	30	21	21	G	33	1	1	22	1	1	0	87
Unigene16752_All	1439	A	R	62	A	34	7	7	G	35	5	5	12	0.133838	1	0	511
Unigene16752_All	1950	C	S	56	C	33	132	132	G	31	9	9	141	0.170282	1	0	72
Unigene16752_All	2022	C	Y	99	C	35	189	189	T	33	65	65	512	0.0462646	1	0	72
Unigene16753_All	394	G	A	22	A	30	10	10	G	0	0	0	10	1	1	0	117
Unigene16753_All	625	A	W	99	A	37	16	16	T	39	15	15	31	0.115804	1	0	97
Unigene16753_All	722	G	R	50	G	35	24	24	A	33	8	8	32	0.167239	1	0	87
Unigene16753_All	809	C	Y	40	C	35	18	18	T	30	7	7	25	0.134943	1	0	5
Unigene16753_All	814	G	R	74	G	37	18	18	A	31	7	7	25	0.511855	1	0	5
Unigene16753_All	1197	T	Y	42	T	34	6	6	C	33	5	5	11	0.331169	1	0	70
Unigene16754_All	1115	A	R	83	A	38	6	6	G	37	6	6	12	0.409091	1	0	990
Unigene16755_All	52	A	R	99	A	37	19	19	G	37	11	11	30	0.539481	1	0	216
Unigene16755_All	268	A	R	99	A	36	26	26	G	33	11	11	37	0.428596	1	0	171
Unigene16755_All	439	C	Y	34	C	35	24	24	T	30	7	7	32	0.195274	1	0	171
Unigene16755_All	817	T	Y	99	T	34	18	18	C	36	11	11	29	0.158726	1	0	159
Unigene16755_All	1153	T	C	34	C	37	15	15	T	0	0	0	15	1	1	0	12
Unigene16755_All	1300	A	R	99	G	37	14	14	A	37	12	12	26	0.685612	1	0	6
Unigene16755_All	1306	A	W	99	T	37	14	14	A	37	12	12	26	0.115577	1	0	6
Unigene16756_All	1401	T	Y	99	T	35	148	148	C	37	45	45	194	0.000495873	1	0	49
Unigene16756_All	1470	A	W	99	A	38	67	67	T	38	16	16	83	0.497697	1	0	20
Unigene16756_All	1750	G	S	99	G	36	120	120	C	37	35	35	155	0.0528646	1	0	59
Unigene16756_All	1864	A	W	99	T	37	37	37	A	37	36	36	73	0.179886	1	0	55
Unigene16756_All	1938	G	R	40	G	34	21	21	A	35	6	6	27	0.294422	1	0	74
Unigene16756_All	2141	T	K	99	T	33	88	88	G	34	42	42	130	0.477172	1	0	15
Unigene16756_All	2178	G	R	99	A	36	137	137	G	36	118	118	321	0.483701	1	0	37
Unigene16756_All	2456	A	R	99	A	32	201	201	G	34	52	52	476	0.0305305	1	0	6
Unigene16757_All	440	C	M	99	C	36	10	10	A	37	9	9	19	0.569378	1	0	90
Unigene16757_All	530	T	W	44	T	37	10	10	A	39	5	5	15	0.714785	1	0	90
Unigene16757_All	638	C	Y	46	C	34	9	9	T	35	5	5	14	0.148851	1	0	108
Unigene16757_All	1007	C	Y	99	C	36	63	63	T	36	24	24	87	0.498106	1	0	111
Unigene16757_All	1118	G	R	99	A	35	64	64	G	36	43	43	108	0.275158	1	0	99
Unigene16757_All	1217	T	Y	99	T	34	42	42	C	37	12	12	54	0.703335	1	0	99
Unigene16757_All	1328	G	R	99	G	37	18	18	A	34	10	10	28	0.514316	1	0	111
Unigene16758_All	534	C	S	99	G	37	13	13	C	37	10	10	23	0.415773	1	0	150
Unigene16758_All	684	C	Y	99	C	34	30	30	T	36	12	12	42	0.625085	1	0	150
Unigene16761_All	158	C	M	99	C	37	27	27	A	37	10	10	37	0.336964	1	0	130
Unigene16761_All	288	A	R	21	G	36	32	32	A	36	5	5	37	0.423205	1	0	130
Unigene16761_All	694	T	W	82	T	38	9	9	A	36	6	6	15	0.651748	1	0	74
Unigene16761_All	768	C	Y	20	C	38	10	10	T	29	5	5	15	0.501166	1	0	74
Unigene16762_All	395	C	A	34	A	33	14	14	C	0	0	0	14	1	1	0	156
Unigene16763_All	286	C	Y	99	C	36	78	78	T	37	18	18	96	0.240711	1	0	31
Unigene16763_All	317	G	R	99	G	32	61	61	A	32	49	49	110	0.229733	1	0	31
Unigene16763_All	359	G	R	99	G	34	89	89	A	35	32	32	121	0.239425	1	0	42
Unigene16763_All	402	T	W	99	T	37	75	75	A	39	25	25	100	0.00392172	1	0	43
Unigene16763_All	454	G	K	99	G	36	36	36	T	37	34	34	70	0.355634	1	0	52
Unigene16763_All	693	A	M	22	A	35	50	50	C	31	10	10	60	0.0203726	1	0	239
Unigene16763_All	1590	T	C	54	C	36	21	21	T	0	0	0	21	1	1	0	197
Unigene16763_All	1787	C	Y	99	C	39	8	8	T	32	8	8	16	0.500272	1	0	12
Unigene16763_All	1799	C	Y	99	T	39	9	9	C	34	8	8	17	0.240354	1	0	12
Unigene16763_All	1886	C	Y	99	T	34	15	15	C	33	12	12	27	0.745217	1	0	48
Unigene16763_All	1934	C	S	99	G	35	14	14	C	33	14	14	28	0.62781	1	0	48
Unigene16763_All	2277	C	Y	67	C	36	17	17	T	39	6	6	24	0.506082	1	0	48
Unigene16763_All	2325	C	Y	99	T	35	20	20	C	36	13	13	33	0.0469891	1	0	37
Unigene16764_All	395	T	K	99	G	37	11	11	T	39	10	10	22	0.59667	1	0	144
Unigene16764_All	539	T	K	94	G	35	13	13	T	34	5	5	18	0.712243	1	0	59
Unigene16764_All	598	C	S	87	C	37	15	15	G	37	6	6	21	0.454795	1	0	59
Unigene16764_All	783	T	W	99	A	35	36	36	T	36	21	21	58	0.438097	1	0	23
Unigene16764_All	806	C	S	99	G	35	62	62	C	36	38	38	100	0.0869288	1	0	9
Unigene16764_All	815	C	Y	99	T	37	62	62	C	38	37	37	99	0.143848	1	0	9
Unigene16764_All	857	C	M	99	C	37	118	118	A	33	46	46	164	6.90231e-07	1	0	31
Unigene16764_All	888	T	Y	99	T	37	106	106	C	37	44	44	150	0.0742649	1	0	31
[truncated: 28,425 more rows]
