# Supplementary material for: Nutrigenomics in Arma chinensis: Transcriptome Analysis of Arma chinensis Fed on Artificial Diet and Chinese Oak Silk Moth Antheraea pernyi Pupae
Source: PLoS One. 2013 Apr 11;8(4):e60881. doi: 10.1371/journal.pone.0060881 (PMC3623872; doi:10.1371/journal.pone.0060881)
Supplement: Table S12 — Putative SNPs in AD_1 Arma chinensis (2). (XLS) [file pone.0060881.s015.xls]

## Sheet: S12
Table S12. Putative SNPs in AD_1 Arma chinensis (2)
GeneID	Coordinate	Reference	Consensus	Quality	BestHit	QualityOfBestHit	UniqReadsNumOfBestHit	AllReadsNumOfBestHit	SecondHit	QualityOfSecondhit	UniqReadsNumOfSecondHit	AllReadsNumOfSecondHit	TotalDepth	RankSum	EstimateCopyNumber	dbSNPTag	DistanceGromLastSNP
Unigene16725_All	1137	C	Y	99	C	35	122	122	T	33	31	31	153	0.0248137	1	0	36
Unigene16725_All	1182	A	R	99	A	36	102	102	G	35	24	24	126	0.0548237	1	0	45
Unigene16725_All	1258	G	R	99	G	36	175	175	A	37	29	29	205	0.115952	1	0	76
Unigene16725_All	1380	G	R	59	G	34	241	241	A	33	14	14	455	0.188013	1	0	36
Unigene16725_All	1416	A	R	99	A	37	213	213	G	38	42	42	430	0.22159	1	0	18
Unigene16725_All	1434	A	R	99	A	35	195	195	G	35	60	60	500	0.221953	1	0	18
Unigene16725_All	1684	T	Y	99	T	38	60	60	C	35	17	17	77	0.0427728	1	0	31
Unigene16726_All	199	A	W	99	A	37	32	32	T	36	12	12	44	0.561145	1	0	33
Unigene16726_All	232	A	R	99	A	36	27	27	G	35	24	24	51	0.350649	1	0	33
Unigene16726_All	275	C	Y	99	C	32	29	29	T	32	16	16	45	0.738316	1	0	5
Unigene16726_All	280	A	R	99	A	29	37	37	G	33	17	17	54	0.0592121	1	0	5
Unigene16726_All	476	A	R	99	A	35	9	9	G	36	8	8	17	0.65146	1	0	34
Unigene16726_All	510	T	Y	99	T	35	17	17	C	36	15	15	33	0.520585	1	0	34
Unigene16726_All	627	A	W	99	A	35	38	38	T	29	28	28	66	0.0452144	1	0	18
Unigene16726_All	645	C	Y	99	C	35	36	36	T	33	31	31	67	0.0484688	1	0	18
Unigene16726_All	668	A	R	99	A	33	40	40	G	36	30	30	70	0.0215127	1	0	23
Unigene16726_All	691	C	M	99	A	36	32	32	C	36	30	30	62	0.62653	1	0	23
Unigene16726_All	812	G	R	92	G	36	17	17	A	37	9	9	26	0.183323	1	0	22
Unigene16726_All	900	C	Y	99	C	34	17	17	T	37	9	9	26	0.57808	1	0	38
Unigene16726_All	938	T	K	99	T	36	21	21	G	37	10	10	31	0.623036	1	0	38
Unigene16726_All	1053	A	M	90	A	36	23	23	C	37	7	7	30	0.71201	1	0	45
Unigene16726_All	1107	G	R	99	G	37	31	31	A	37	26	26	57	0.710628	1	0	18
Unigene16726_All	1125	C	Y	99	C	35	30	30	T	32	31	31	61	0.00159112	1	0	18
Unigene16726_All	1205	A	R	99	A	31	48	48	G	36	41	41	90	0.00306315	1	0	8
Unigene16726_All	1213	G	R	99	G	35	56	56	A	37	40	40	96	0.0538152	1	0	8
Unigene16726_All	1315	G	R	99	G	32	36	36	A	32	20	20	56	0.67888	1	0	36
Unigene16726_All	1351	A	R	31	A	30	30	30	G	37	7	7	38	0.00159818	1	0	36
Unigene16726_All	1407	G	R	99	A	38	20	20	G	37	20	20	40	0.319757	1	0	56
Unigene16726_All	1489	T	K	98	T	33	53	53	G	34	11	11	64	0.387929	1	0	82
Unigene16726_All	1621	C	M	99	C	36	46	46	A	38	11	11	57	0.652717	1	0	84
Unigene16726_All	1705	C	Y	99	C	33	22	22	T	37	9	9	34	0.703568	1	0	51
Unigene16726_All	1756	T	K	99	T	36	23	23	G	37	22	22	45	0.0336238	1	0	51
Unigene16726_All	1885	A	R	57	A	36	40	40	G	35	8	8	48	0.451424	1	0	27
Unigene16726_All	1915	T	K	99	T	36	33	33	G	36	17	17	50	0.584831	1	0	7
Unigene16726_All	1942	A	R	99	A	36	27	27	G	37	21	21	48	0.303283	1	0	9
Unigene16726_All	1951	G	S	99	G	35	36	36	C	33	9	9	45	0.395541	1	0	7
Unigene16726_All	1990	G	S	91	G	35	25	25	C	37	7	7	32	0.150893	1	0	31
Unigene16726_All	2117	G	K	87	G	35	22	22	T	38	7	7	29	0.0675675	1	0	7
Unigene16726_All	2124	T	Y	82	T	37	26	26	C	38	8	8	34	0.118112	1	0	7
Unigene16726_All	2142	T	Y	99	T	38	24	24	C	38	10	10	34	0.492589	1	0	10
Unigene16726_All	2152	C	Y	99	C	37	26	26	T	38	10	10	36	0.307051	1	0	10
Unigene16726_All	2227	A	W	99	A	37	19	19	T	36	9	9	29	0.423487	1	0	48
Unigene16726_All	2275	G	R	99	G	33	28	28	A	33	13	13	41	0.294699	1	0	30
Unigene16726_All	2305	C	Y	99	C	35	34	34	T	35	21	21	55	0.548156	1	0	30
Unigene16726_All	2429	C	S	99	C	34	53	53	G	35	16	16	69	0.423893	1	0	116
Unigene16726_All	2651	G	R	99	G	36	117	117	A	34	17	17	134	0.00914159	1	0	65
Unigene16726_All	2716	T	W	99	T	30	105	105	A	34	13	13	119	0.0362174	1	0	65
Unigene16729_All	132	G	R	77	A	29	12	12	G	31	5	5	17	0.479638	1	0	37
Unigene16729_All	169	G	R	74	G	36	16	16	A	35	7	7	23	0.335703	1	0	37
Unigene1672_All	51	C	S	92	C	38	206	206	G	38	49	49	1041	0.193165	1	0	149
Unigene16730_All	1216	A	R	99	A	36	35	35	G	34	19	19	54	0.54254	1	0	66
Unigene16730_All	1555	T	W	99	T	35	18	18	A	31	18	18	36	0.0367948	1	0	75
Unigene16730_All	2206	C	Y	99	C	35	74	74	T	35	18	18	92	0.397115	1	0	37
Unigene16730_All	2243	A	R	84	A	36	82	82	G	33	14	14	96	0.112267	1	0	37
Unigene16730_All	2314	A	R	99	A	38	32	32	G	38	24	24	56	0.684088	1	0	71
Unigene16730_All	2422	C	Y	72	C	34	14	14	T	38	7	7	21	0.509469	1	0	108
Unigene16730_All	2649	C	M	99	C	35	60	60	A	35	10	10	70	0.420192	1	0	92
Unigene16730_All	2741	A	R	99	A	33	108	108	G	32	20	20	128	0.104428	1	0	16
Unigene16730_All	2757	A	R	99	A	35	122	122	G	36	22	22	145	0.179049	1	0	16
Unigene16730_All	2836	A	R	99	G	32	92	92	A	33	35	35	127	0.432517	1	0	66
Unigene16730_All	2902	C	Y	53	T	37	69	69	C	37	8	8	77	0.4076	1	0	18
Unigene16730_All	2920	T	W	99	A	34	85	85	T	34	23	23	108	0.297087	1	0	15
Unigene16730_All	2935	A	R	99	G	36	88	88	A	35	30	30	118	0.261194	1	0	15
Unigene16730_All	3193	G	R	99	A	37	32	32	G	37	14	14	46	0.242906	1	0	258
Unigene16730_All	3593	A	W	99	T	37	164	164	A	34	62	62	226	6.21e-08	1	0	34
Unigene16731_All	224	C	S	99	C	35	17	17	G	33	10	10	27	0.337491	1	0	8
Unigene16731_All	232	A	R	70	A	33	20	20	G	32	7	7	27	0.592443	1	0	8
Unigene16731_All	262	A	R	99	A	35	18	18	G	36	9	9	27	0.410226	1	0	30
Unigene16731_All	555	A	R	41	A	35	20	20	G	32	6	6	26	0.744089	1	0	12
Unigene16731_All	1074	A	R	92	A	33	61	61	G	36	11	11	73	0.0854147	1	0	514
Unigene16731_All	1588	G	R	94	G	36	62	62	A	35	14	14	76	0.111357	1	0	120
Unigene16731_All	1708	G	R	88	G	36	99	99	A	38	11	11	110	0.113987	1	0	120
Unigene16731_All	1890	T	Y	99	T	33	70	70	C	34	20	20	92	0.482582	1	0	182
Unigene16731_All	2546	A	R	99	A	36	48	48	G	37	20	20	68	0.136331	1	0	42
Unigene16731_All	3128	A	M	99	A	33	129	129	C	33	22	22	152	0.266851	1	0	58
Unigene16731_All	3645	C	S	99	C	36	176	176	G	35	32	32	209	0.104774	1	0	183
Unigene16731_All	3828	G	S	99	G	33	73	73	C	29	23	23	98	0.00609721	1	0	60
Unigene16731_All	3894	A	R	56	A	34	119	119	G	29	11	11	130	0.0394821	1	0	6
Unigene16731_All	4330	G	R	99	G	35	204	204	A	34	51	51	347	0.00184378	1	0	93
Unigene16731_All	4423	A	R	99	A	36	187	187	G	37	54	54	242	0.368123	1	0	61
Unigene16731_All	4484	A	R	99	A	35	214	214	G	30	41	41	342	0.000159159	1	0	10
Unigene16731_All	5101	A	R	99	A	38	118	118	G	39	16	16	134	0.313069	1	0	43
Unigene16734_All	1060	C	Y	99	C	32	12	12	T	37	10	10	22	0.506229	1	0	378
Unigene16734_All	1627	A	W	99	A	34	16	16	T	35	11	11	27	0.562744	1	0	567
Unigene16734_All	2890	C	Y	99	C	37	26	26	T	33	19	19	45	0.0666485	1	0	78
Unigene16734_All	3475	T	Y	97	C	38	6	6	T	38	5	5	11	0.698052	1	0	9
Unigene16735_All	334	T	W	29	T	31	52	52	A	37	6	6	61	0.546231	1	0	249
Unigene16735_All	616	C	Y	99	C	33	39	39	T	35	20	20	59	0.657027	1	0	282
Unigene16735_All	1114	C	Y	99	C	34	39	39	T	35	20	20	59	0.713792	1	0	45
Unigene16735_All	1159	T	W	99	T	35	28	28	A	37	17	17	45	0.139793	1	0	6
Unigene16735_All	1165	T	Y	99	T	35	29	29	C	34	21	21	50	0.677825	1	0	6
Unigene16735_All	1267	G	R	99	G	37	23	23	A	37	13	13	36	0.198472	1	0	102
Unigene16735_All	1525	G	R	99	G	33	48	48	A	35	25	25	73	0.202939	1	0	122
Unigene16735_All	1647	C	Y	99	T	35	30	30	C	33	22	22	52	0.653365	1	0	6
Unigene16735_All	1653	T	W	99	T	35	45	45	A	31	11	11	56	0.649172	1	0	6
Unigene16735_All	1678	G	K	99	G	35	43	43	T	34	13	13	56	0.616369	1	0	25
Unigene16735_All	1915	G	R	24	G	34	55	55	A	37	8	8	63	0.133051	1	0	173
Unigene16735_All	2088	G	S	99	G	37	34	34	C	35	12	12	46	0.00806365	1	0	64
Unigene16735_All	2361	C	Y	99	C	37	39	39	T	37	17	17	56	0.617188	1	0	103
Unigene16735_All	2464	A	R	99	A	36	31	31	G	37	20	20	51	0.267029	1	0	81
Unigene16735_All	2545	C	M	99	C	33	30	30	A	36	9	9	39	0.595892	1	0	81
Unigene16735_All	2662	C	Y	99	C	36	30	30	T	36	13	13	43	0.711201	1	0	36
Unigene16735_All	2698	A	R	99	A	36	38	38	G	36	18	18	56	0.529256	1	0	21
Unigene16735_All	2719	T	Y	99	C	37	32	32	T	38	26	26	58	0.207318	1	0	21
Unigene16735_All	3410	G	K	99	G	34	16	16	T	36	11	11	27	0.0889287	1	0	104
Unigene16735_All	3514	A	M	99	A	34	18	18	C	36	13	13	31	0.368708	1	0	41
Unigene16735_All	3592	G	R	44	G	31	15	15	A	36	5	5	20	0.5764	1	0	9
Unigene16735_All	3601	T	Y	49	T	33	14	14	C	33	5	5	19	0.517802	1	0	9
Unigene16735_All	3675	C	S	99	G	36	8	8	C	35	8	8	16	0.719619	1	0	74
Unigene16735_All	3895	G	R	68	G	34	18	18	A	36	7	7	25	0.720651	1	0	220
Unigene16736_All	104	G	R	23	G	36	26	26	A	40	6	6	32	0.00590603	1	0	357
Unigene16736_All	1006	G	S	99	C	33	25	25	G	31	24	24	49	0.724379	1	0	354
Unigene16736_All	1535	A	R	59	A	34	17	17	G	37	6	6	23	0.0368213	1	0	30
Unigene16736_All	1984	T	Y	45	T	36	22	22	C	36	6	6	28	0.660657	1	0	23
Unigene16737_All	378	G	R	62	G	35	8	8	A	37	5	5	13	0.6554	1	0	114
Unigene16737_All	738	C	M	99	C	36	20	20	A	37	16	16	36	0.697328	1	0	80
Unigene16737_All	818	A	R	77	A	32	28	28	G	36	8	8	36	0.504264	1	0	35
Unigene16737_All	853	A	R	64	A	39	30	30	G	35	8	8	38	0.356154	1	0	23
Unigene16737_All	876	G	R	99	A	34	24	24	G	35	15	15	39	0.524324	1	0	23
Unigene16737_All	975	A	W	99	A	37	21	21	T	37	12	12	33	0.37699	1	0	99
Unigene16737_All	1543	C	M	99	C	35	69	69	A	33	12	12	81	0.441867	1	0	350
Unigene16737_All	1893	G	R	99	G	32	73	73	A	33	22	22	96	0.44736	1	0	107
Unigene16737_All	2000	C	Y	99	C	36	30	30	T	35	14	14	44	0.563747	1	0	58
Unigene16737_All	2058	C	Y	99	C	37	37	37	T	36	11	11	48	0.165721	1	0	58
Unigene16737_All	2220	A	W	99	A	35	26	26	T	36	13	13	41	0.435792	1	0	162
Unigene16737_All	2562	C	Y	99	C	34	41	41	T	30	20	20	61	0.0579421	1	0	75
Unigene16737_All	2637	A	R	99	A	37	45	45	G	36	42	42	87	0.375042	1	0	75
Unigene16737_All	2712	G	R	99	G	35	125	125	A	35	38	38	164	0.409963	1	0	11
Unigene16737_All	2977	G	R	99	G	34	69	69	A	35	36	36	105	0.450305	1	0	28
Unigene16737_All	3005	G	R	85	G	36	175	175	A	37	13	13	188	0.31629	1	0	28
Unigene16737_All	3060	C	Y	99	C	30	130	130	T	36	18	18	149	0.0056322	1	0	12
Unigene16737_All	3072	G	R	99	G	29	77	77	A	29	31	31	109	0.485102	1	0	12
Unigene16737_All	3339	C	Y	99	C	34	55	55	T	29	30	30	87	0.000351138	1	0	267
Unigene16738_All	406	G	R	99	G	35	36	36	A	35	21	21	57	0.561449	1	0	43
Unigene16738_All	449	A	R	99	A	34	45	45	G	36	15	15	60	0.28272	1	0	43
Unigene16738_All	718	G	R	99	G	38	21	21	A	39	9	9	30	0.0313571	1	0	206
Unigene16738_All	1836	G	R	27	G	37	97	97	A	34	9	9	106	0.0201094	1	0	374
Unigene16738_All	2210	T	Y	99	T	35	59	59	C	35	13	13	72	0.410245	1	0	374
Unigene16739_All	258	A	R	99	A	35	66	66	G	35	24	24	90	0.411557	1	0	30
Unigene16739_All	288	C	Y	66	C	36	77	77	T	35	11	11	88	0.148962	1	0	30
Unigene16739_All	530	T	Y	99	T	35	100	100	C	36	21	21	121	0.484987	1	0	68
Unigene16739_All	598	T	K	22	T	37	86	86	G	39	7	7	93	0.0726653	1	0	68
Unigene1673_All	333	C	Y	99	C	36	13	13	T	39	9	9	22	0.178742	1	0	645
Unigene16740_All	152	T	Y	99	T	34	97	97	C	35	35	35	132	0.345702	1	0	6
Unigene16740_All	158	T	Y	99	T	31	98	98	C	36	56	56	154	1.62e-09	1	0	6
Unigene16740_All	204	T	Y	29	C	33	246	246	T	34	8	8	280	0.277849	1	0	12
Unigene16740_All	295	G	R	99	A	33	191	191	G	33	63	63	432	0.0416929	1	0	32
Unigene16740_All	327	T	K	99	T	37	200	200	G	37	51	51	428	0.202439	1	0	26
Unigene16740_All	353	C	Y	99	C	31	230	230	T	34	23	23	503	0.0466721	1	0	9
Unigene16740_All	497	T	W	99	T	28	194	194	A	30	53	53	457	0.0708185	1	0	13
Unigene16740_All	529	C	M	99	C	35	238	238	A	37	17	17	380	0.0615491	1	0	14
Unigene16740_All	596	A	W	99	A	34	183	183	T	35	58	58	806	0.158736	1	0	21
Unigene16740_All	629	A	R	99	A	32	162	162	G	33	93	93	950	0.0495495	1	0	12
Unigene16740_All	653	T	Y	99	C	30	137	137	T	30	118	118	916	0.0748506	1	0	9
Unigene16740_All	663	T	W	99	T	33	223	223	A	33	31	31	761	0.0142504	1	0	10
Unigene16740_All	716	T	Y	42	T	31	239	239	C	32	15	15	1170	0.237693	1	0	40
Unigene16740_All	792	A	W	99	A	36	202	202	T	36	52	52	579	0.0779212	1	0	13
Unigene16740_All	805	G	R	99	G	34	234	234	A	37	19	19	497	0.010547	1	0	13
Unigene16740_All	856	G	R	99	G	37	238	238	A	38	16	16	331	0.320055	1	0	13
Unigene16740_All	869	G	R	52	G	36	243	243	A	37	11	11	584	0.325219	1	0	13
Unigene16740_All	882	C	S	39	C	35	247	247	G	36	8	8	808	0.281094	1	0	8
Unigene16740_All	890	G	R	99	G	32	159	159	A	33	95	95	766	0.475019	1	0	8
Unigene16740_All	1073	C	M	99	C	35	224	224	A	34	23	23	728	0.173787	1	0	6
Unigene16740_All	1079	T	W	99	T	36	212	212	A	34	34	34	742	0.0515084	1	0	5
Unigene16740_All	1084	A	R	99	A	37	222	222	G	36	33	33	746	0.0718625	1	0	5
Unigene16740_All	1091	G	R	99	G	36	216	216	A	37	39	39	768	0.38045	1	0	7
Unigene16740_All	1151	A	R	50	A	37	242	242	G	35	13	13	647	0.192558	1	0	6
Unigene16740_All	1253	G	K	31	G	34	244	244	T	38	11	11	1416	0.00145271	1	0	21
Unigene16740_All	1274	C	M	99	C	30	210	210	A	33	45	45	1469	0.00462796	1	0	21
Unigene16740_All	1325	C	Y	99	C	32	219	219	T	33	35	35	1639	0.278523	1	0	51
Unigene16740_All	1415	T	Y	99	T	36	210	210	C	34	41	41	943	0.231553	1	0	9
Unigene16740_All	1429	T	Y	99	T	35	198	198	C	35	57	57	1003	0.311299	1	0	13
Unigene16740_All	1442	C	Y	99	C	34	223	223	T	33	32	32	977	0.156293	1	0	13
Unigene16740_All	1481	C	M	99	C	35	195	195	A	35	55	55	833	0.414745	1	0	12
Unigene16740_All	1493	T	Y	99	T	32	226	226	C	33	28	28	860	0.242552	1	0	12
Unigene16740_All	1520	T	W	99	T	35	229	229	A	34	25	25	677	0.0905345	1	0	10
Unigene16740_All	1530	A	R	99	A	36	228	228	G	38	27	27	690	0.0230925	1	0	10
Unigene16740_All	1553	T	Y	99	T	38	238	238	C	38	17	17	804	0.239479	1	0	11
Unigene16740_All	1580	T	Y	99	T	36	186	186	C	38	67	67	473	0.125929	1	0	10
Unigene16740_All	1723	A	R	99	A	32	202	202	G	34	53	53	1174	0.0549504	1	0	22
Unigene16740_All	1745	C	Y	99	C	32	146	146	T	31	81	81	1074	0.472249	1	0	22
Unigene16740_All	1803	A	R	99	A	33	234	234	G	34	21	21	770	0.5	1	0	7
Unigene16740_All	1838	C	Y	99	C	36	225	225	T	38	30	30	759	0.0172808	1	0	30
Unigene16740_All	1868	T	Y	99	T	37	205	205	C	37	50	50	324	0.276803	1	0	27
Unigene16740_All	1895	T	W	99	T	31	217	217	A	36	28	28	468	0.000424446	1	0	16
Unigene16740_All	1911	A	W	90	A	36	217	217	T	36	21	21	757	0.125383	1	0	8
Unigene16740_All	1919	C	Y	99	C	36	235	235	T	37	20	20	887	0.350598	1	0	8
Unigene16740_All	1972	A	R	28	A	27	245	245	G	26	10	10	2360	0.479069	1	0	40
Unigene16740_All	2027	C	M	99	C	23	226	226	A	25	29	29	2652	0.112856	1	0	6
Unigene16740_All	2066	C	Y	99	C	29	201	201	T	32	53	53	2719	0.201141	1	0	12
Unigene16740_All	2090	A	W	99	A	36	229	229	T	38	26	26	2192	0.154214	1	0	10
Unigene16740_All	2102	T	W	99	T	36	143	143	A	37	112	112	2183	0.322073	1	0	7
Unigene16740_All	2120	T	Y	63	T	36	237	237	C	35	17	17	1904	0.0219691	1	0	9
Unigene16740_All	2178	C	Y	44	C	33	245	245	T	33	10	10	289	0.221347	1	0	23
Unigene16740_All	2201	G	R	99	G	35	239	239	A	33	15	15	618	0.013239	1	0	23
Unigene16740_All	2295	T	Y	68	T	24	233	233	C	27	14	14	2441	0.048849	1	0	5
Unigene16740_All	2342	G	R	27	G	29	243	243	A	29	12	12	2325	0.486407	1	0	41
Unigene16740_All	2405	A	R	60	A	33	235	235	G	33	19	19	2952	0.286629	1	0	6
Unigene16740_All	2442	A	R	35	A	34	246	246	G	33	8	8	1523	0.205675	1	0	6
Unigene16740_All	2448	G	R	54	G	25	244	244	A	27	11	11	1342	0.380156	1	0	5
Unigene16740_All	2453	T	Y	99	T	24	194	194	C	26	57	57	1474	0.0528756	1	0	5
Unigene16740_All	2474	G	R	99	G	30	235	235	A	32	19	19	1367	0.141282	1	0	11
Unigene16740_All	2564	T	Y	99	T	36	216	216	C	37	39	39	1550	0.399909	1	0	11
Unigene16740_All	2657	A	M	99	A	34	163	163	C	32	91	91	930	0.000160393	1	0	14
Unigene16740_All	2672	G	R	99	G	34	230	230	A	36	24	24	1141	0.201432	1	0	15
Unigene16740_All	2750	A	W	78	A	22	236	236	T	19	16	16	3147	0.132502	1	0	9
Unigene16740_All	2786	C	Y	99	C	26	204	204	T	18	48	48	3394	5.27e-06	1	0	19
Unigene16740_All	2805	G	K	60	G	22	208	208	T	24	47	47	3197	0.0431129	1	0	5
Unigene16740_All	2907	G	S	99	G	35	209	209	C	35	46	46	2074	0.217855	1	0	11
Unigene16740_All	2933	A	R	99	A	33	200	200	G	34	53	53	1234	0.376146	1	0	13
Unigene16740_All	2957	G	R	52	G	32	238	238	A	32	17	17	3063	0.299486	1	0	15
Unigene16740_All	2972	T	Y	99	T	29	215	215	C	30	32	32	3818	0.0467342	1	0	15
Unigene16740_All	3089	G	S	25	G	27	247	247	C	26	7	7	5877	0.476079	1	0	21
Unigene16740_All	3110	T	Y	99	T	22	217	217	C	27	34	34	5118	0.00818002	1	0	6
Unigene16740_All	3182	C	Y	99	C	34	226	226	T	30	29	29	3273	6.49e-05	1	0	28
Unigene16740_All	3277	T	Y	99	T	24	167	167	C	30	85	85	4053	5.46e-08	1	0	32
Unigene16740_All	3326	T	Y	99	T	27	231	231	C	28	20	20	3801	0.316197	1	0	6
Unigene16740_All	3358	A	M	99	A	29	191	191	C	28	62	62	3684	0.213609	1	0	20
Unigene16740_All	3510	A	R	99	A	31	235	235	G	33	14	14	4981	0.357639	1	0	8
Unigene16740_All	3764	T	K	99	T	35	227	227	G	36	27	27	1424	0.379731	1	0	14
Unigene16740_All	3779	C	S	99	C	34	163	163	G	34	92	92	1324	0.427057	1	0	14
Unigene16740_All	3793	A	R	99	A	33	200	200	G	33	54	54	1158	0.287935	1	0	9
Unigene16741_All	207	A	R	67	A	31	63	63	G	37	9	9	72	0.0397341	1	0	173
Unigene16741_All	522	C	Y	99	C	36	33	33	T	38	17	17	50	0.284995	1	0	315
Unigene16742_All	163	G	R	38	G	36	13	13	A	33	5	5	18	0.123016	1	0	100
Unigene16742_All	264	G	K	57	G	31	99	99	T	36	8	8	107	0.0165031	1	0	101
Unigene16742_All	474	A	R	99	A	36	41	41	G	34	14	14	55	0.729089	1	0	48
Unigene16742_All	522	A	R	99	G	36	56	56	A	32	18	18	75	0.0394133	1	0	48
Unigene16742_All	588	A	R	99	G	33	28	28	A	31	10	10	38	0.272823	1	0	54
Unigene16742_All	642	T	Y	99	C	36	42	42	T	34	14	14	56	0.581097	1	0	54
Unigene16742_All	888	A	R	99	A	34	41	41	G	34	15	15	56	0.398891	1	0	66
Unigene16742_All	954	A	R	83	G	36	77	77	A	33	10	10	87	0.423494	1	0	66
Unigene16742_All	1105	G	K	99	G	37	140	140	T	37	10	10	150	0.460988	1	0	20
Unigene16742_All	1125	T	K	99	T	33	100	100	G	34	39	39	139	0.203992	1	0	20
Unigene16742_All	1203	A	R	30	A	35	91	91	G	38	8	8	99	0.288255	1	0	9
Unigene16742_All	1335	G	R	99	G	38	85	85	A	37	22	22	107	0.228484	1	0	36
Unigene16742_All	1371	A	W	99	A	34	109	109	T	35	35	35	144	0.117021	1	0	36
Unigene16742_All	1554	C	Y	99	T	35	72	72	C	35	23	23	95	0.437864	1	0	114
Unigene16742_All	1668	T	Y	44	C	33	33	33	T	35	6	6	39	0.626362	1	0	16
Unigene16742_All	1684	T	W	99	A	35	36	36	T	37	14	14	51	0.57212	1	0	16
Unigene16742_All	1827	A	R	99	A	35	33	33	G	37	15	15	48	0.298668	1	0	111
Unigene16742_All	1938	A	R	81	A	35	20	20	G	34	7	7	27	0.0992162	1	0	57
Unigene16742_All	2385	G	S	54	G	30	27	27	C	27	7	7	34	0.308413	1	0	52
Unigene16742_All	2443	G	S	99	G	35	12	12	C	34	8	8	20	0.669608	1	0	6
Unigene16743_All	180	C	M	99	C	34	32	32	A	37	22	22	54	0.140786	1	0	16
Unigene16743_All	196	T	Y	80	T	36	45	45	C	39	8	8	53	0.510995	1	0	16
Unigene16743_All	222	G	R	32	G	37	33	33	A	36	6	6	39	0.693996	1	0	9
Unigene16743_All	687	G	R	59	G	36	8	8	A	36	5	5	13	0.416472	1	0	96
Unigene16743_All	783	T	Y	99	T	36	11	11	C	33	8	8	19	0.0886851	1	0	96
Unigene16743_All	1428	C	Y	99	T	36	14	14	C	36	11	11	25	0.383749	1	0	7
Unigene16743_All	1435	G	R	99	A	35	14	14	G	35	11	11	25	0.723287	1	0	7
Unigene16743_All	1442	A	W	99	A	34	16	16	T	35	7	7	23	0.692291	1	0	7
Unigene16743_All	1485	C	Y	21	C	29	9	9	T	39	5	5	16	0.000999001	1	0	30
Unigene16743_All	1527	T	Y	99	T	38	10	10	C	38	7	7	17	0.518871	1	0	9
Unigene16744_All	380	T	Y	83	T	36	8	8	C	37	6	6	14	0.425907	1	0	54
Unigene16744_All	527	A	M	79	A	36	20	20	C	36	6	6	26	0.417886	1	0	57
Unigene16744_All	584	A	R	95	A	39	28	28	G	39	10	10	38	0.467521	1	0	57
Unigene16744_All	656	C	Y	99	C	35	12	12	T	36	8	8	20	0.285679	1	0	39
Unigene16744_All	695	A	W	63	A	33	16	16	T	34	5	5	21	0.664971	1	0	39
Unigene16744_All	749	T	Y	59	T	37	18	18	C	38	7	7	25	0.26695	1	0	48
Unigene16744_All	797	G	R	99	G	33	24	24	A	36	13	13	37	0.503061	1	0	48
Unigene16744_All	995	A	W	99	A	34	12	12	T	37	7	7	19	0.58506	1	0	126
Unigene16744_All	1121	A	W	99	A	36	16	16	T	36	7	7	23	0.486998	1	0	126
Unigene16745_All	1555	A	R	43	A	37	24	24	G	37	6	6	30	0.231103	1	0	879
Unigene16746_All	174	G	R	37	G	35	18	18	A	32	6	6	24	0.125435	1	0	9
Unigene16746_All	209	T	Y	69	C	35	16	16	T	31	6	6	22	0.0243657	1	0	15
Unigene16746_All	224	A	R	70	A	34	12	12	G	30	7	7	19	0.725451	1	0	15
Unigene16746_All	487	C	S	54	C	31	22	22	G	34	5	5	27	0.641125	1	0	25
Unigene16746_All	524	C	M	99	C	36	21	21	A	29	16	16	37	0.56343	1	0	12
Unigene16746_All	651	A	M	99	C	28	12	12	A	30	6	6	18	0.722905	1	0	5
Unigene16746_All	656	A	R	49	A	29	14	14	G	31	6	6	20	0.588261	1	0	5
Unigene16746_All	697	G	R	27	G	35	34	34	A	35	6	6	41	0.576496	1	0	17
Unigene16746_All	746	G	R	99	G	31	25	25	A	30	12	12	41	0.649337	1	0	6
Unigene16746_All	804	G	K	99	G	24	19	19	T	27	15	15	34	0.696063	1	0	18
Unigene16746_All	836	A	R	99	G	36	28	28	A	37	16	16	44	0.223208	1	0	22
Unigene16746_All	858	T	Y	99	T	36	20	20	C	35	17	17	37	0.699507	1	0	22
Unigene16746_All	880	C	Y	88	C	32	33	33	T	32	9	9	44	0.652057	1	0	22
Unigene16746_All	984	C	Y	48	C	36	34	34	T	37	7	7	41	0.674145	1	0	20
Unigene16746_All	1004	C	Y	99	T	35	19	19	C	35	19	19	38	0.408732	1	0	14
Unigene16746_All	1018	A	R	46	A	34	31	31	G	36	6	6	37	0.132334	1	0	5
Unigene16746_All	1079	T	Y	99	C	38	25	25	T	39	22	22	47	0.629763	1	0	10
Unigene16746_All	1089	C	Y	99	C	38	33	33	T	36	15	15	48	0.505869	1	0	9
Unigene16746_All	1098	G	K	99	G	38	31	31	T	39	20	20	51	0.073188	1	0	9
Unigene16746_All	1141	C	Y	99	C	35	42	42	T	31	13	13	56	0.519867	1	0	10
Unigene16746_All	1151	A	M	99	A	36	27	27	C	35	10	10	37	0.627744	1	0	10
Unigene16746_All	1184	T	K	37	T	39	32	32	G	39	7	7	39	0.199032	1	0	33
Unigene16746_All	1368	G	R	83	G	38	25	25	A	39	8	8	33	0.681574	1	0	20
Unigene16746_All	1391	G	R	46	G	36	28	28	A	37	7	7	35	0.745981	1	0	17
Unigene16746_All	1408	T	Y	99	T	35	18	18	C	35	11	11	29	0.275037	1	0	17
Unigene16747_All	559	C	M	81	C	33	56	56	A	32	10	10	66	0.143645	1	0	35
Unigene16747_All	594	A	W	91	A	34	36	36	T	35	9	9	46	0.569982	1	0	35
Unigene16747_All	967	C	Y	55	C	35	23	23	T	35	7	7	30	0.206572	1	0	117
Unigene16747_All	1084	T	Y	30	T	37	26	26	C	37	6	6	32	0.471894	1	0	117
Unigene16747_All	1511	G	R	99	G	34	41	41	A	38	12	12	53	0.039722	1	0	130
Unigene16747_All	1641	T	Y	99	T	36	44	44	C	32	11	11	55	0.119099	1	0	54
Unigene16747_All	1695	T	K	35	T	36	58	58	G	33	9	9	67	0.265938	1	0	54
Unigene16747_All	1921	A	M	94	A	36	94	94	C	37	10	10	104	0.285066	1	0	6
Unigene16747_All	1927	T	W	74	T	36	94	94	A	36	10	10	104	0.266646	1	0	6
Unigene16747_All	1998	G	K	99	G	34	130	130	T	33	20	20	150	0.272463	1	0	67
Unigene16747_All	2065	A	R	99	A	36	123	123	G	34	25	25	149	0.0242549	1	0	67
Unigene16747_All	2170	G	R	53	G	36	104	104	A	37	12	12	116	0.25116	1	0	105
Unigene16747_All	2373	C	Y	99	C	35	82	82	T	35	23	23	105	0.492273	1	0	57
Unigene16747_All	2430	G	K	99	G	34	77	77	T	32	24	24	101	0.207868	1	0	57
Unigene16747_All	2523	T	Y	99	T	35	153	153	C	35	37	37	191	0.398775	1	0	41
Unigene16747_All	2564	A	R	99	A	35	170	170	G	36	42	42	212	0.445817	1	0	41
Unigene16747_All	2669	C	S	99	C	35	164	164	G	36	42	42	206	0.0825436	1	0	105
Unigene16747_All	2892	T	Y	99	T	34	146	146	C	34	28	28	174	0.316633	1	0	27
Unigene16747_All	3370	T	Y	99	T	35	93	93	C	33	20	20	113	0.471513	1	0	34
Unigene16747_All	3404	A	R	99	A	37	93	93	G	38	18	18	111	0.425436	1	0	20
Unigene16747_All	3485	C	Y	99	C	32	31	31	T	34	12	12	43	0.566281	1	0	16
Unigene16747_All	3523	A	W	99	T	35	35	35	A	32	13	13	48	0.00830375	1	0	22
Unigene16747_All	3709	C	Y	30	T	36	27	27	C	31	6	6	33	0.130133	1	0	186
Unigene16748_All	315	T	Y	85	C	37	6	6	T	37	5	5	11	0.396104	1	0	137
Unigene16749_All	757	A	R	22	A	31	45	45	G	29	8	8	53	0.077922	1	0	233
Unigene16749_All	1598	G	R	99	G	36	70	70	A	37	14	14	84	0.272217	1	0	241
Unigene16750_All	108	T	Y	52	T	37	38	38	C	37	6	6	44	0.687854	1	0	30
Unigene16750_All	204	A	W	53	A	38	26	26	T	38	6	6	32	0.165644	1	0	96
Unigene16751_All	226	A	R	26	A	34	28	28	G	35	6	6	34	0.456204	1	0	81
Unigene16751_All	371	A	R	31	A	37	19	19	G	33	6	6	25	0.600107	1	0	145
Unigene16751_All	982	T	Y	65	T	37	18	18	C	38	6	6	24	0.48705	1	0	62
Unigene16751_All	1044	A	R	99	A	34	15	15	G	33	9	9	24	0.586809	1	0	62
Unigene16751_All	1138	C	S	99	C	37	12	12	G	38	7	7	19	0.741784	1	0	9
Unigene16751_All	1147	T	W	50	T	37	11	11	A	35	5	5	18	0.220467	1	0	6
Unigene16751_All	1231	A	R	99	A	37	23	23	G	34	16	16	39	0.59706	1	0	63
Unigene16751_All	1535	A	R	99	A	36	25	25	G	34	12	12	38	0.0284578	1	0	155
Unigene16751_All	1690	A	R	95	A	33	39	39	G	26	13	13	52	0.527229	1	0	155
Unigene16751_All	2050	T	W	99	T	35	69	69	A	33	10	10	79	0.105056	1	0	36
Unigene16751_All	2086	A	R	79	A	37	41	41	G	35	11	11	52	0.630285	1	0	36
Unigene16751_All	2155	T	W	99	T	35	102	102	A	35	28	28	130	0.313111	1	0	15
Unigene16751_All	2170	G	K	99	G	36	106	106	T	35	28	28	134	0.404858	1	0	15
Unigene16751_All	2191	G	R	76	G	36	118	118	A	33	12	12	130	0.0479642	1	0	21
Unigene16751_All	2272	A	R	99	A	36	89	89	G	35	25	25	114	0.0751996	1	0	81
Unigene16751_All	2371	A	R	20	A	35	48	48	G	37	7	7	55	0.169244	1	0	24
Unigene16751_All	2395	G	R	99	G	33	99	99	A	29	17	17	116	0.0226227	1	0	24
Unigene16751_All	2566	T	Y	97	T	38	28	28	C	38	9	9	37	0.603044	1	0	21
Unigene16751_All	2587	G	R	99	G	37	29	29	A	38	10	10	39	0.103758	1	0	9
Unigene16751_All	2596	T	W	99	T	37	29	29	A	38	11	11	40	0.0927179	1	0	9
Unigene16751_All	2609	C	Y	99	C	33	39	39	T	32	13	13	52	0.643167	1	0	13
Unigene16751_All	2722	T	Y	99	T	33	45	45	C	29	19	19	65	0.240302	1	0	90
Unigene16751_All	2812	C	S	99	C	33	24	24	G	33	18	18	42	0.737475	1	0	87
Unigene16751_All	2899	G	K	99	G	35	78	78	T	33	19	19	97	0.0710522	1	0	49
Unigene16751_All	2948	G	K	99	G	30	81	81	T	34	28	28	109	0.118506	1	0	38
Unigene16751_All	2986	G	R	99	G	36	108	108	A	31	22	22	131	0.0154764	1	0	18
Unigene16751_All	3004	G	R	99	G	34	129	129	A	36	23	23	152	0.132276	1	0	18
Unigene16751_All	3043	A	R	61	A	34	85	85	G	35	10	10	95	0.196293	1	0	39
Unigene16751_All	3259	A	M	99	A	33	42	42	C	32	30	30	72	0.263065	1	0	36
Unigene16751_All	3295	C	S	99	C	32	37	37	G	24	15	15	52	0.520591	1	0	36
Unigene16752_All	319	C	M	99	C	34	29	29	A	35	24	24	53	0.461193	1	0	59
Unigene16752_All	1103	C	Y	37	C	35	64	64	T	28	10	10	75	0.033318	1	0	336
Unigene16752_All	1439	A	R	99	A	32	48	48	G	32	30	30	78	0.377044	1	0	336
Unigene16752_All	1950	C	S	88	C	34	209	209	G	34	11	11	220	0.183659	1	0	72
Unigene16752_All	2022	C	Y	99	C	35	221	221	T	34	34	34	646	0.419349	1	0	72
Unigene16753_All	340	A	R	65	G	37	5	5	A	27	7	7	12	0.0744949	1	0	12
Unigene16753_All	625	A	W	99	T	37	13	13	A	35	6	6	19	0.161433	1	0	199
Unigene16754_All	1115	A	R	99	A	38	15	15	G	38	11	11	26	0.739839	1	0	1536
Unigene16755_All	439	C	Y	99	C	34	61	61	T	33	15	15	76	0.0556712	1	0	167
Unigene16755_All	606	C	Y	99	C	36	25	25	T	35	13	13	38	0.313462	1	0	167
Unigene16755_All	817	T	C	98	C	29	89	89	T	2	1	1	90	1	1	0	33
Unigene16755_All	850	G	R	99	G	33	66	66	A	32	31	31	97	0.103656	1	0	33
Unigene16755_All	1153	T	Y	99	T	35	49	49	C	37	15	15	64	0.054721	1	0	276
Unigene16755_All	1429	G	R	99	G	34	27	27	A	36	16	16	44	0.162396	1	0	69
Unigene16755_All	1498	G	R	99	G	33	32	32	A	33	13	13	45	0.39759	1	0	69
Unigene16755_All	1732	T	W	99	T	33	46	46	A	37	11	11	57	0.59884	1	0	234
Unigene16755_All	2035	G	K	92	G	31	27	27	T	36	8	8	35	0.0305635	1	0	266
Unigene16755_All	2311	T	W	99	T	37	14	14	A	39	10	10	24	0.129525	1	0	10
Unigene16755_All	2371	C	Y	54	C	31	14	14	T	38	6	6	21	0.00585655	1	0	60
Unigene16756_All	1243	G	R	71	G	36	67	67	A	38	11	11	78	0.0596568	1	0	100
Unigene16756_All	1392	T	Y	72	T	37	48	48	C	38	9	9	57	0.570982	1	0	9
Unigene16756_All	1401	T	Y	99	T	36	43	43	C	38	12	12	55	0.589623	1	0	9
Unigene16756_All	1470	A	W	99	A	38	29	29	T	39	25	25	54	0.150296	1	0	20
Unigene16756_All	1547	T	W	82	T	33	52	52	A	36	9	9	61	0.175165	1	0	77
Unigene16756_All	1735	C	Y	99	C	37	214	214	T	37	17	17	231	0.243904	1	0	74
Unigene16756_All	1809	C	Y	99	C	36	194	194	T	36	14	14	208	0.440607	1	0	55
Unigene16756_All	1864	A	W	99	T	37	101	101	A	37	65	65	166	0.0904094	1	0	22
Unigene16756_All	1886	T	Y	99	C	35	21	21	T	35	18	18	39	0.293388	1	0	5
Unigene16756_All	1938	G	R	99	G	36	17	17	A	34	13	13	30	0.553191	1	0	14
Unigene16756_All	1952	G	K	45	G	36	93	93	T	38	7	7	100	0.12682	1	0	14
Unigene16756_All	2178	G	R	99	A	36	145	145	G	37	110	110	334	0.151233	1	0	34
Unigene16756_All	2399	G	S	99	G	37	241	241	C	36	14	14	378	0.435598	1	0	57
Unigene16756_All	2456	A	R	99	A	32	171	171	G	34	83	83	323	0.000316746	1	0	34
Unigene16757_All	84	T	Y	99	T	36	18	18	C	32	10	10	28	0.0155338	1	0	83
Unigene16757_All	398	G	R	99	G	36	64	64	A	37	22	22	86	0.233468	1	0	42
Unigene16757_All	440	C	M	99	C	36	54	54	A	36	27	27	82	0.125665	1	0	42
Unigene16757_All	530	T	W	99	T	33	54	54	A	35	35	35	93	0.0425494	1	0	42
Unigene16757_All	572	G	R	99	G	30	39	39	A	35	26	26	65	0.0327956	1	0	42
Unigene16757_All	638	C	Y	99	C	37	49	49	T	37	26	26	75	0.356669	1	0	66
Unigene16757_All	749	A	R	99	A	35	21	21	G	36	11	11	32	0.608381	1	0	63
Unigene16757_All	812	T	Y	99	T	32	13	13	C	33	12	12	25	0.744674	1	0	36
Unigene16757_All	848	C	Y	99	C	31	14	14	T	35	11	11	25	0.250334	1	0	12
Unigene16757_All	860	C	M	99	C	34	15	15	A	35	12	12	27	0.564061	1	0	12
Unigene16757_All	1118	G	R	99	G	36	52	52	A	36	33	33	85	0.357479	1	0	99
Unigene16757_All	1217	T	Y	99	T	36	27	27	C	36	20	20	48	0.286001	1	0	99
Unigene16757_All	1358	G	R	57	G	35	52	52	A	31	10	10	62	0.0211543	1	0	24
Unigene16757_All	1382	T	K	87	T	35	58	58	G	36	9	9	67	0.41627	1	0	9
Unigene16757_All	1391	G	R	80	G	36	42	42	A	32	10	10	52	0.0860166	1	0	9
Unigene16757_All	1697	G	R	54	G	32	8	8	A	38	5	5	13	0.516317	1	0	29
Unigene16757_All	1726	G	R	99	A	38	11	11	G	39	10	10	21	0.086676	1	0	29
Unigene16758_All	138	T	Y	97	T	37	16	16	C	37	8	8	24	0.191302	1	0	24
Unigene16758_All	339	C	Y	77	C	30	11	11	T	37	6	6	17	0.509131	1	0	195
Unigene16758_All	534	C	S	99	G	33	17	17	C	36	13	13	30	0.528167	1	0	81
Unigene16758_All	684	C	Y	95	C	33	19	19	T	34	9	9	28	0.442466	1	0	69
Unigene16758_All	1638	A	R	52	A	39	6	6	G	38	4	5	11	0.690476	1.18182	0	42
Unigene1675_All	166	G	R	53	G	38	9	9	A	39	5	5	14	0.34965	1	0	123
Unigene1675_All	289	C	Y	54	C	36	17	17	T	37	6	6	23	0.743217	1	0	123
Unigene16760_All	521	G	K	83	G	35	24	24	T	34	7	7	31	0.281506	1	0	42
Unigene16760_All	563	A	R	36	A	36	20	20	G	35	6	6	26	0.0550898	1	0	42
Unigene16760_All	922	T	Y	37	T	37	39	39	C	36	7	7	46	0.326655	1	0	84
Unigene16760_All	1006	G	R	64	G	32	59	59	A	29	13	13	72	0.379257	1	0	10
Unigene16760_All	1016	A	R	99	A	35	52	52	G	33	22	22	74	0.106076	1	0	10
Unigene16760_All	1214	G	R	64	G	35	11	11	A	37	6	6	17	0.601083	1	0	122
Unigene16760_All	1367	G	R	99	A	35	19	19	G	38	17	17	36	0.0778153	1	0	107
Unigene16760_All	1474	T	W	99	T	35	28	28	A	38	13	13	41	0.512661	1	0	9
Unigene16760_All	1483	T	Y	99	T	36	21	21	C	35	20	20	41	0.141196	1	0	9
Unigene16760_All	1739	G	R	99	G	37	45	45	A	39	20	20	65	0.123352	1	0	75
Unigene16760_All	1983	T	W	99	T	32	48	48	A	36	13	13	61	0.0643815	1	0	19
Unigene16760_All	2092	T	Y	85	T	35	58	58	C	37	11	11	69	0.136045	1	0	89
Unigene16760_All	2227	T	Y	99	T	36	75	75	C	37	16	16	91	0.265807	1	0	135
Unigene16760_All	2396	C	Y	99	C	36	41	41	T	38	11	11	52	0.587932	1	0	169
Unigene16761_All	607	C	Y	99	C	37	14	14	T	34	11	11	25	0.579318	1	0	87
Unigene16761_All	694	T	W	57	T	37	18	18	A	38	5	5	23	0.634551	1	0	87
Unigene16761_All	872	T	Y	99	T	38	11	11	C	39	10	10	21	0.431633	1	0	102
Unigene16761_All	974	A	M	99	A	34	10	10	C	37	7	7	17	0.703131	1	0	102
Unigene16762_All	395	C	M	89	A	37	13	13	C	36	5	5	18	0.071662	1	0	156
Unigene16763_All	273	C	Y	99	C	34	101	101	T	36	46	46	147	0.0486101	1	0	13
Unigene16763_All	286	C	Y	99	T	36	98	98	C	36	29	29	127	0.335413	1	0	13
Unigene16763_All	317	G	R	99	G	34	139	139	A	30	20	20	159	0.0197255	1	0	31
Unigene16763_All	359	G	R	99	A	36	143	143	G	32	24	24	168	0.0361315	1	0	42
Unigene16763_All	402	T	W	99	A	38	120	120	T	36	25	25	145	0.135273	1	0	43
Unigene16763_All	454	G	T	99	T	37	139	139	C	16	2	2	141	1	1	0	52
Unigene16763_All	693	A	M	99	C	35	88	88	A	31	28	28	116	0.0238132	1	0	239
Unigene16763_All	969	T	K	99	G	37	77	77	T	37	33	33	110	0.427542	1	0	263
Unigene16763_All	1232	C	Y	99	C	37	50	50	T	39	17	17	67	0.139925	1	0	32
Unigene16763_All	1327	T	Y	85	T	37	31	31	C	39	8	8	39	0.610336	1	0	17
Unigene16763_All	1344	C	M	99	C	35	42	42	A	36	12	12	54	0.505979	1	0	17
Unigene16763_All	1377	G	R	99	G	37	33	33	A	37	15	15	48	0.613443	1	0	6
Unigene16763_All	1383	C	Y	99	C	37	31	31	T	37	14	14	45	0.554632	1	0	6
Unigene16763_All	1460	A	W	99	A	37	38	38	T	36	18	18	56	0.145736	1	0	18
Unigene16763_All	1480	A	R	99	A	36	59	59	G	33	25	25	84	0.0311806	1	0	20
Unigene16763_All	1590	T	Y	99	T	34	95	95	C	36	41	41	136	0.0886451	1	0	110
Unigene16763_All	1787	C	Y	87	C	36	43	43	T	37	10	10	53	0.389821	1	0	99
Unigene16763_All	1934	C	S	89	C	33	56	56	G	36	11	11	67	0.00119022	1	0	48
Unigene16763_All	2052	G	K	99	G	34	59	59	T	37	21	21	80	0.00922506	1	0	72
Unigene16763_All	2124	C	Y	99	C	35	37	37	T	35	13	13	51	0.62095	1	0	72
Unigene16763_All	2277	C	M	99	C	38	31	31	A	36	11	11	43	0.607176	1	0	26
Unigene16763_All	2303	A	W	99	A	33	30	30	T	31	10	10	40	0.445017	1	0	22
Unigene16763_All	2394	C	Y	99	C	34	59	59	T	29	25	25	84	0.0104757	1	0	28
Unigene16764_All	783	T	W	99	A	36	72	72	T	34	11	11	83	0.0093787	1	0	23
Unigene16764_All	806	C	S	99	G	36	104	104	C	37	12	12	116	0.145455	1	0	9
Unigene16764_All	815	C	Y	99	T	37	107	107	C	38	10	10	117	0.304389	1	0	9
Unigene16764_All	857	C	M	66	C	36	151	151	A	30	12	12	163	0.00329786	1	0	31
Unigene16764_All	888	T	Y	95	T	37	129	129	C	36	12	12	141	0.0864109	1	0	31
Unigene16764_All	981	C	M	28	C	38	78	78	A	37	7	7	85	0.318609	1	0	46
Unigene16764_All	1339	G	R	78	A	37	30	30	G	36	8	8	38	0.665136	1	0	8
Unigene16764_All	1347	G	S	99	C	38	26	26	G	35	9	9	38	0.537131	1	0	8
Unigene16764_All	1489	T	W	99	A	34	54	54	T	31	10	10	64	0.255785	1	0	142
Unigene16764_All	1962	C	S	99	C	37	38	38	G	38	9	9	47	0.624266	1	0	70
Unigene16764_All	2292	T	Y	99	C	36	54	54	T	38	32	32	86	0.406422	1	0	124
Unigene16764_All	2416	G	K	99	G	37	32	32	T	37	14	14	46	0.657123	1	0	124
Unigene16764_All	3027	A	R	99	A	35	115	115	G	35	16	16	131	0.448269	1	0	243
Unigene16764_All	3611	A	R	88	A	37	30	30	G	36	9	9	39	0.329099	1	0	584
Unigene16765_All	744	T	Y	99	T	31	51	51	C	33	19	19	70	0.16258	1	0	958
Unigene16766_All	90	T	Y	88	C	37	6	6	T	38	5	5	11	0.665584	1	0	167
Unigene16766_All	403	A	R	99	A	33	19	19	G	34	16	16	35	0.682844	1	0	146
Unigene16766_All	769	A	W	99	T	29	28	28	A	37	11	11	39	0.0743231	1	0	143
Unigene16767_All	176	G	R	99	G	35	70	70	A	35	51	51	121	0.15117	1	0	41
Unigene16767_All	217	C	Y	99	C	32	77	77	T	32	35	35	112	0.146527	1	0	41
Unigene16767_All	400	A	R	99	A	38	182	182	G	37	37	37	219	0.118779	1	0	183
Unigene16767_All	629	T	Y	90	T	32	200	200	C	32	13	13	213	0.346516	1	0	16
Unigene16767_All	645	C	Y	99	C	32	149	149	T	35	22	22	171	0.0240295	1	0	16
Unigene16767_All	839	T	Y	99	T	34	86	86	C	35	14	14	100	0.345554	1	0	164
Unigene16767_All	1003	T	Y	99	T	34	45	45	C	34	21	21	66	0.355055	1	0	34
Unigene16767_All	1037	T	Y	39	T	34	65	65	C	26	13	13	78	0.111216	1	0	34
Unigene16767_All	1218	T	Y	56	T	33	57	57	C	37	13	13	70	0.0199899	1	0	127
Unigene16767_All	1345	T	Y	99	T	35	75	75	C	37	31	31	106	0.0562578	1	0	127
Unigene16767_All	1574	T	Y	99	T	35	38	38	C	37	13	13	51	0.243543	1	0	25
Unigene16767_All	1717	T	Y	99	T	36	87	87	C	34	15	15	102	0.103585	1	0	118
Unigene1676_All	52	C	Y	21	C	38	22	22	T	37	5	5	27	0.223597	1	0	11
Unigene1676_All	63	T	K	21	T	38	22	22	G	36	5	5	27	0.392791	1	0	11
Unigene1676_All	121	T	Y	99	T	38	65	65	C	35	47	47	112	0.0633777	1	0	7
Unigene1676_All	128	A	W	99	A	35	65	65	T	32	47	47	112	0.00143968	1	0	7
Unigene16771_All	856	T	Y	53	T	37	18	18	C	30	6	6	24	0.176225	1	0	1043
Unigene16772_All	412	T	Y	66	T	35	6	6	C	38	5	5	11	0.123377	1	0	6
Unigene16773_All	423	G	R	99	G	35	47	47	A	36	12	12	59	0.230954	1	0	149
Unigene16773_All	876	C	S	99	C	36	49	49	G	35	15	15	64	0.490517	1	0	453
Unigene16774_All	151	C	Y	99	C	37	54	54	T	36	22	22	76	0.0108259	1	0	95
Unigene16774_All	246	C	Y	25	C	31	89	89	T	33	12	12	101	0.408696	1	0	49
Unigene16774_All	295	G	S	99	G	36	220	220	C	36	34	34	258	0.178322	1	0	49
Unigene16774_All	438	C	Y	99	C	38	146	146	T	37	109	109	297	0.447772	1	0	143
Unigene16774_All	868	C	Y	99	C	33	34	34	T	31	13	13	48	0.558238	1	0	81
Unigene16774_All	1384	A	R	99	A	33	49	49	G	36	33	33	84	0.00951278	1	0	58
Unigene16774_All	1442	C	Y	70	C	32	45	45	T	36	10	10	55	0.0223299	1	0	17
Unigene16774_All	1459	T	W	99	T	32	39	39	A	38	9	9	48	0.520303	1	0	17
Unigene16774_All	1555	G	R	99	G	33	29	29	A	33	29	29	58	0.116534	1	0	63
Unigene16774_All	1618	G	K	99	G	29	29	29	T	33	15	15	44	0.587722	1	0	63
Unigene16774_All	1774	C	M	99	C	34	21	21	A	37	11	11	32	0.524015	1	0	9
Unigene16774_All	1783	A	R	99	A	33	19	19	G	32	13	13	32	0.719954	1	0	9
Unigene16774_All	1924	C	Y	99	T	35	18	18	C	35	15	15	33	0.380886	1	0	33
Unigene16774_All	1957	T	Y	99	C	35	14	14	T	31	14	14	28	0.50104	1	0	33
Unigene16774_All	2302	C	M	99	C	27	41	41	A	21	13	13	55	0.217358	1	0	60
Unigene16774_All	2383	A	R	99	A	35	60	60	G	36	24	24	85	0.255125	1	0	18
Unigene16774_All	2401	G	R	67	G	37	71	71	A	33	12	12	83	0.0578264	1	0	9
Unigene16774_All	2410	C	Y	99	C	33	52	52	T	36	31	31	83	0.0113586	1	0	9
Unigene16774_All	2532	C	Y	51	C	31	55	55	T	34	9	9	64	0.307793	1	0	22
Unigene16774_All	2659	T	W	99	T	35	24	24	A	33	17	17	41	0.511965	1	0	20
Unigene16774_All	2679	G	R	62	G	31	21	21	A	27	8	8	29	0.214286	1	0	10
Unigene16774_All	2689	C	Y	99	C	28	16	16	T	30	9	9	25	0.423024	1	0	10
Unigene16774_All	2790	C	Y	54	C	36	27	27	T	38	8	8	35	0.0894587	1	0	17
Unigene16774_All	2820	A	M	99	A	31	17	17	C	31	14	14	31	0.684867	1	0	30
Unigene16774_All	2860	T	Y	99	C	34	22	22	T	33	15	15	39	0.481734	1	0	40
Unigene16774_All	3149	C	Y	54	C	36	27	27	T	32	8	8	35	0.118008	1	0	30
Unigene16775_All	103	C	M	99	A	36	30	30	C	36	26	26	56	0.555723	1	0	36
Unigene16775_All	297	C	Y	99	T	33	40	40	C	33	19	19	59	0.395402	1	0	23
Unigene16775_All	320	A	W	99	T	36	41	41	A	38	21	21	62	0.615048	1	0	23
Unigene16775_All	540	A	R	99	G	37	46	46	A	36	27	27	73	0.175859	1	0	13
Unigene16775_All	553	A	R	99	G	37	46	46	A	37	27	27	73	0.220267	1	0	13
Unigene16775_All	773	T	Y	99	T	35	71	71	C	37	44	44	115	0.236862	1	0	40
Unigene16776_All	1065	G	R	99	G	34	111	111	A	33	14	14	125	0.10306	1	0	318
Unigene16776_All	1563	G	R	24	G	37	77	77	A	36	8	8	85	0.434253	1	0	176
Unigene16777_All	386	T	W	47	T	37	15	15	A	34	5	5	20	0.367712	1	0	354
Unigene16778_All	1243	A	W	76	A	40	11	11	T	39	5	5	16	0.254808	1	0	153
Unigene16778_All	1396	A	M	68	A	36	11	11	C	39	5	5	16	0.522436	1	0	153
Unigene16778_All	1612	A	R	70	A	37	22	22	G	38	7	7	29	0.373055	1	0	216
Unigene16778_All	2061	C	Y	21	C	35	36	36	T	37	6	6	42	0.382908	1	0	89
Unigene16778_All	2150	G	R	99	G	33	28	28	A	36	13	13	41	0.0399231	1	0	32
Unigene16778_All	2182	G	R	99	G	36	24	24	A	37	19	19	43	0.139831	1	0	32
Unigene16778_All	2332	A	R	99	A	38	53	53	G	36	35	35	88	0.0112863	1	0	39
Unigene16780_All	130	G	R	99	G	35	33	33	A	38	10	10	43	0.535139	1	0	17
Unigene16780_All	172	A	T	91	T	31	89	89	A	0	0	0	89	1	1	0	20
Unigene16780_All	199	A	R	88	A	36	102	102	G	34	17	17	119	0.00746847	1	0	27
Unigene16780_All	417	G	R	99	G	31	200	200	A	31	55	55	484	0.369811	1	0	218
Unigene16780_All	651	G	R	99	G	35	180	180	A	36	53	53	233	0.226965	1	0	75
Unigene16780_All	726	T	K	99	T	28	119	119	G	34	52	52	179	0.000331137	1	0	12
Unigene16780_All	825	G	R	99	G	34	158	158	A	32	61	61	219	0.246628	1	0	18
Unigene16780_All	843	C	Y	99	C	27	165	165	T	31	54	54	229	0.0234717	1	0	18
Unigene16780_All	883	T	K	99	T	34	138	138	G	34	36	36	174	0.431422	1	0	25
Unigene16780_All	1047	G	R	99	G	32	187	187	A	32	68	68	261	0.479711	1	0	135
Unigene16780_All	1185	A	W	99	A	36	162	162	T	36	48	48	210	0.282752	1	0	120
Unigene16780_All	1305	G	K	99	G	34	120	120	T	26	49	49	188	2.72e-07	1	0	9
Unigene16780_All	1314	A	R	99	G	33	101	101	A	32	86	86	188	0.172054	1	0	9
Unigene16780_All	1380	G	R	99	G	34	103	103	A	33	80	80	183	0.178431	1	0	54
Unigene16780_All	1434	C	Y	99	C	34	134	134	T	34	36	36	170	0.490111	1	0	54
Unigene16780_All	1596	A	R	99	A	33	81	81	G	35	20	20	102	0.0208391	1	0	90
Unigene16780_All	1686	T	Y	99	T	35	111	111	C	34	16	16	127	0.373229	1	0	90
Unigene16780_All	1806	G	R	99	G	34	87	87	A	36	26	26	113	0.230639	1	0	57
Unigene16780_All	1863	C	Y	99	C	35	34	34	T	34	14	14	48	0.314828	1	0	57
Unigene16780_All	1929	A	W	92	A	37	39	39	T	36	9	9	48	0.154298	1	0	66
Unigene16780_All	2076	C	Y	99	C	34	76	76	T	37	37	37	113	0.0398102	1	0	147
Unigene16780_All	2310	C	Y	99	C	32	74	74	T	31	29	29	104	0.0928284	1	0	24
Unigene16780_All	2334	C	Y	37	C	36	94	94	T	37	8	8	102	0.435728	1	0	24
Unigene16780_All	2466	G	R	99	A	34	33	33	G	34	29	29	62	0.641385	1	0	12
Unigene16780_All	2478	A	R	99	A	35	59	59	G	35	36	36	95	0.422453	1	0	12
Unigene16780_All	2550	A	W	99	T	32	66	66	A	34	43	43	109	0.0639936	1	0	42
Unigene16780_All	2592	G	K	99	G	33	85	85	T	28	14	14	100	0.29555	1	0	36
Unigene16780_All	2628	G	R	99	G	37	57	57	A	36	13	13	70	0.0555435	1	0	36
Unigene16780_All	2666	C	Y	28	C	35	17	17	T	36	5	5	22	0.352168	1	0	21
Unigene16781_All	196	T	Y	99	C	33	8	8	T	36	6	6	14	0.525142	1	0	11
Unigene16781_All	207	G	R	99	A	36	7	7	G	38	6	6	13	0.314103	1	0	11
Unigene16781_All	241	T	K	99	T	36	8	8	G	37	7	7	15	0.140482	1	0	6
Unigene16781_All	292	C	Y	30	C	35	14	14	T	34	5	5	19	0.343395	1	0	6
Unigene16781_All	319	A	R	62	A	37	21	21	G	35	7	7	28	0.320233	1	0	12
Unigene16781_All	345	G	R	30	G	36	16	16	A	34	5	5	21	0.664971	1	0	5
Unigene16781_All	442	G	R	73	G	38	19	19	A	36	7	7	26	0.606815	1	0	18
Unigene16781_All	526	C	M	63	C	37	14	14	A	35	5	5	19	0.597824	1	0	27
Unigene16781_All	656	G	R	99	G	34	12	12	A	31	11	11	23	0.369949	1	0	7
Unigene16781_All	737	G	K	56	G	35	19	19	T	36	5	5	24	0.611589	1	0	59
Unigene16781_All	868	T	Y	99	T	36	11	11	C	35	11	11	22	0.373829	1	0	20
Unigene16781_All	916	A	R	64	A	35	16	16	G	34	6	6	22	0.295016	1	0	33
Unigene16781_All	949	A	W	99	A	38	14	14	T	38	7	7	21	0.427872	1	0	29
Unigene16781_All	1092	T	Y	99	C	36	17	17	T	38	13	13	31	0.150163	1	0	26
Unigene16781_All	1118	C	M	99	A	36	15	15	C	37	14	14	29	0.423347	1	0	7
Unigene16781_All	1141	A	R	99	G	34	16	16	A	30	13	13	29	0.0659098	1	0	16
Unigene16781_All	1164	A	W	99	A	36	10	10	T	36	9	9	19	0.726206	1	0	20
Unigene16782_All	261	G	R	52	G	33	9	9	A	31	5	5	14	0.590909	1	0	60
Unigene16782_All	661	A	R	61	A	34	10	10	G	33	5	5	15	0.42957	1	0	146
Unigene16782_All	1353	T	Y	30	T	35	42	42	C	32	8	8	50	0.0364911	1	0	132
Unigene16782_All	1485	C	Y	99	C	33	61	61	T	33	31	31	92	0.350448	1	0	132
Unigene16783_All	291	T	Y	99	T	36	114	114	C	38	14	14	129	0.0069798	1	0	751
Unigene16783_All	1042	G	R	65	G	36	48	48	A	34	11	11	59	0.1422	1	0	453
Unigene16783_All	1495	T	Y	99	T	34	21	21	C	35	13	13	34	0.26439	1	0	453
Unigene16783_All	2045	T	Y	27	T	37	55	55	C	30	9	9	64	0.00831674	1	0	65
Unigene16783_All	2110	G	R	30	G	34	27	27	A	35	6	6	33	0.619824	1	0	65
Unigene16783_All	3115	C	Y	99	C	34	120	120	T	36	27	27	147	0.169037	1	0	118
Unigene16783_All	3233	G	R	99	G	36	41	41	A	32	24	24	65	0.00461936	1	0	118
Unigene16784_All	390	T	W	49	T	36	27	27	A	32	6	6	33	0.490937	1	0	66
Unigene16784_All	498	A	R	87	A	36	20	20	G	35	7	7	27	0.691562	1	0	108
Unigene16784_All	639	C	M	96	C	35	11	11	A	35	6	6	17	0.720911	1	0	141
Unigene16784_All	1071	C	M	73	C	35	16	16	A	38	5	5	21	0.599489	1	0	141
Unigene16785_All	753	A	R	99	A	35	94	94	G	36	31	31	125	0.146421	1	0	121
Unigene16785_All	937	C	Y	99	C	37	76	76	T	38	22	22	98	0.0832417	1	0	63
Unigene16785_All	1069	C	Y	99	C	36	53	53	T	34	13	13	66	0.086538	1	0	51
Unigene16785_All	1120	C	Y	97	C	33	29	29	T	36	10	10	39	0.247676	1	0	15
Unigene16785_All	1135	C	Y	99	C	31	40	40	T	32	17	17	57	0.652539	1	0	15
Unigene16785_All	1259	G	R	99	G	36	33	33	A	34	12	12	46	0.0258867	1	0	124
Unigene16785_All	1402	A	R	99	A	35	68	68	G	38	27	27	95	0.00238691	1	0	143
Unigene16787_All	26	T	W	56	T	34	19	19	A	39	5	5	24	0.515799	1	0	9
Unigene16787_All	35	A	M	82	A	36	17	17	C	38	7	7	24	0.521637	1	0	9
Unigene16787_All	307	C	M	99	C	36	38	38	A	37	15	15	53	0.542954	1	0	97
Unigene16787_All	404	C	S	99	G	36	16	16	C	29	13	13	29	0.539077	1	0	97
Unigene16787_All	604	G	R	32	G	36	25	25	A	39	6	6	31	0.578524	1	0	45
Unigene16787_All	949	A	W	99	A	33	115	115	T	32	13	13	128	0.406466	1	0	20
Unigene16787_All	1048	T	Y	25	T	36	57	57	C	36	7	7	64	0.377558	1	0	66
Unigene16787_All	1114	C	M	99	C	37	86	86	A	38	12	12	98	0.416314	1	0	6
Unigene16787_All	1120	G	R	99	G	35	86	86	A	36	14	14	100	0.115648	1	0	6
Unigene16787_All	1225	T	Y	80	T	36	155	155	C	37	12	12	168	0.173112	1	0	45
Unigene16787_All	1477	T	Y	22	T	35	71	71	C	37	7	7	78	0.296944	1	0	18
Unigene16787_All	1495	T	W	99	T	35	100	100	A	36	19	19	119	0.413854	1	0	18
Unigene16787_All	1550	G	K	99	G	35	99	99	T	36	20	20	119	0.268195	1	0	32
Unigene16787_All	1615	C	Y	99	C	38	83	83	T	37	26	26	109	0.313117	1	0	27
Unigene16789_All	375	T	W	64	T	35	14	14	A	40	5	5	19	0.539001	1	0	42
Unigene16789_All	611	C	Y	86	C	35	7	7	T	37	6	6	13	0.558566	1	0	11
Unigene16789_All	849	G	R	61	G	32	7	7	A	33	5	5	12	0.607955	1	0	41
Unigene16789_All	1070	T	Y	99	C	35	7	7	T	37	6	6	13	0.0903263	1	0	26
Unigene16789_All	1466	G	K	99	G	38	10	10	T	36	9	9	19	0.0563771	1	0	14
Unigene16790_All	157	T	W	99	A	35	10	10	T	32	8	8	18	0.204123	1	0	47
Unigene16790_All	391	A	W	99	A	37	37	37	T	33	10	10	47	0.692137	1	0	99
Unigene16790_All	490	A	R	99	G	36	59	59	A	35	14	14	73	0.158215	1	0	21
Unigene16790_All	518	T	K	99	T	31	52	52	G	33	12	12	64	0.421598	1	0	7
Unigene16790_All	546	G	R	99	G	35	79	79	A	35	16	16	96	0.472251	1	0	18
Unigene16790_All	564	C	Y	99	C	36	89	89	T	38	19	19	108	0.0229118	1	0	18
Unigene16790_All	651	A	R	89	A	31	84	84	G	28	15	15	99	0.0190495	1	0	87
Unigene16790_All	765	G	R	81	G	35	60	60	A	35	11	11	71	0.132989	1	0	6
Unigene16790_All	771	C	Y	99	C	35	49	49	T	35	14	14	63	0.477193	1	0	6
Unigene16790_All	825	G	K	76	G	34	24	24	T	35	7	7	31	0.250949	1	0	6
Unigene16790_All	831	A	R	42	A	32	26	26	G	38	7	7	33	0.0104002	1	0	6
Unigene16790_All	867	A	R	99	A	37	26	26	G	37	9	9	37	0.245924	1	0	36
Unigene16790_All	1020	T	Y	99	T	32	50	50	C	29	11	11	61	0.700705	1	0	138
Unigene16794_All	297	G	A	20	A	35	8	8	G	0	0	0	8	1	1	0	80
Unigene16795_All	25	T	C	36	C	34	35	35	T	39	2	2	37	1	1	0	241
Unigene16795_All	273	G	S	99	G	34	31	31	C	35	8	8	39	0.712814	1	0	5
Unigene16795_All	815	C	M	99	C	31	102	102	A	32	19	19	121	0.299031	1	0	129
Unigene16795_All	944	T	W	52	T	34	42	42	A	35	7	7	49	0.681674	1	0	129
Unigene16795_All	1219	C	M	99	C	37	103	103	A	37	13	13	116	0.174517	1	0	30
Unigene16796_All	607	G	R	44	G	32	245	245	A	33	10	10	4180	0.186112	1	0	49
Unigene16796_All	789	C	Y	55	C	36	149	149	T	38	13	13	162	0.069903	1	0	12
Unigene16796_All	986	A	W	99	A	35	23	23	T	36	9	9	32	0.693329	1	0	157
Unigene16796_All	1379	A	R	99	A	34	229	229	G	38	26	26	268	0.000111055	1	0	48
Unigene16796_All	1543	T	W	99	T	36	240	240	A	35	15	15	561	0.274586	1	0	64
Unigene16796_All	1607	G	R	99	G	35	168	168	A	37	87	87	551	0.000399261	1	0	64
Unigene16796_All	1678	T	Y	99	T	35	219	219	C	37	20	20	239	0.0715068	1	0	71
Unigene16796_All	1788	T	K	99	T	38	145	145	G	39	15	15	160	0.265536	1	0	47
Unigene16796_All	1835	A	R	99	G	36	105	105	A	35	35	35	140	0.0435616	1	0	47
Unigene16796_All	2003	G	K	99	T	38	15	15	G	35	16	16	31	0.512345	1	0	19
Unigene16796_All	2022	T	Y	99	T	38	18	18	C	39	12	12	30	0.0792146	1	0	19
Unigene16796_All	2396	G	R	99	G	34	49	49	A	37	30	30	79	0.00892275	1	0	29
Unigene16796_All	2425	T	Y	99	T	36	47	47	C	37	31	31	78	0.0634464	1	0	29
Unigene16798_All	177	T	Y	99	C	34	12	12	T	32	7	7	19	0.325177	1	0	600
Unigene16799_All	424	A	M	49	A	36	16	16	C	37	5	5	21	0.420856	1	0	72
Unigene16799_All	906	C	Y	99	T	36	20	20	C	35	13	13	33	0.631104	1	0	410
Unigene167_All	84	T	Y	52	T	35	18	18	C	37	6	6	24	0.268292	1	0	10
Unigene167_All	94	C	Y	59	C	36	16	16	T	38	6	6	22	0.485679	1	0	5
Unigene167_All	99	T	W	99	T	37	16	16	A	38	7	7	23	0.730534	1	0	5
Unigene167_All	209	C	Y	99	C	38	12	12	T	37	9	9	21	0.729252	1	0	30
Unigene167_All	257	A	R	99	A	34	15	15	G	34	11	11	26	0.439239	1	0	9
Unigene167_All	266	T	W	99	T	33	14	14	A	36	12	12	26	0.390505	1	0	9
Unigene167_All	629	C	Y	99	T	34	33	33	C	35	28	28	61	0.341065	1	0	15
Unigene167_All	644	T	Y	99	T	30	20	20	C	29	20	20	40	0.410074	1	0	15
Unigene167_All	707	C	Y	28	C	37	53	53	T	39	8	8	61	0.584396	1	0	63
Unigene167_All	795	T	K	99	T	38	78	78	G	39	20	20	98	0.0705016	1	0	32
Unigene167_All	827	T	Y	99	T	38	120	120	C	38	20	20	140	0.334051	1	0	6
Unigene167_All	833	C	Y	99	C	35	111	111	T	37	31	31	142	0.164701	1	0	6
Unigene167_All	909	T	W	99	T	34	116	116	A	30	44	44	160	0.011491	1	0	16
Unigene167_All	925	T	Y	99	T	35	136	136	C	36	22	22	158	0.075087	1	0	16
Unigene167_All	956	G	R	99	G	34	108	108	A	36	41	41	149	0.000847686	1	0	5
Unigene167_All	999	T	Y	75	T	38	23	23	C	34	9	9	32	0.00652306	1	0	9
Unigene16802_All	167	G	K	25	G	29	193	193	T	30	9	9	203	0.0576174	1	0	169
Unigene16802_All	899	C	Y	99	C	37	241	241	T	36	13	13	276	0.202897	1	0	27
Unigene16802_All	926	T	K	27	T	36	243	243	G	28	10	10	257	0.00932717	1	0	27
Unigene16802_All	1086	A	W	99	A	34	124	124	T	37	29	29	153	0.00282531	1	0	44
Unigene16802_All	1889	G	R	60	G	34	186	186	A	36	10	10	197	0.428472	1	0	759
Unigene16804_All	112	C	T	22	T	35	10	10	C	0	0	0	10	1	1	0	12
Unigene16804_All	529	A	R	99	A	37	39	39	G	36	24	24	63	0.547994	1	0	310
Unigene16804_All	839	A	R	75	A	38	26	26	G	35	8	8	35	0.153541	1	0	68
Unigene16804_All	907	G	R	99	G	30	25	25	A	31	14	14	39	0.0878036	1	0	68
Unigene16805_All	286	A	R	99	A	38	14	14	G	38	9	9	23	0.414538	1	0	119
Unigene16805_All	478	C	Y	60	C	35	7	7	T	34	5	5	12	0.607955	1	0	16
Unigene16805_All	494	A	R	72	A	35	7	7	G	34	6	6	13	0.0506993	1	0	16
Unigene16805_All	650	T	Y	55	T	36	18	18	C	35	6	6	24	0.268292	1	0	156
Unigene16806_All	383	C	M	95	C	39	11	11	A	39	6	6	17	0.740304	1	0	30
Unigene16806_All	419	T	Y	56	T	36	14	14	C	35	5	5	19	0.532465	1	0	6
Unigene16806_All	558	G	R	68	G	33	6	6	A	37	5	5	11	0.534632	1	0	139
Unigene16808_All	411	G	R	99	G	36	14	14	A	36	10	10	24	0.272885	1	0	114
Unigene16808_All	702	T	Y	99	T	31	37	37	C	32	17	17	54	0.706224	1	0	159
Unigene16808_All	861	T	K	44	T	36	44	44	G	37	6	6	50	0.436431	1	0	159
Unigene16808_All	1256	T	K	51	T	37	24	24	G	37	5	5	29	0.422433	1	0	38
Unigene16809_All	175	A	R	99	G	37	30	30	A	35	13	13	43	0.342823	1	0	24
Unigene16809_All	199	T	W	99	A	37	21	21	T	34	17	17	38	0.51709	1	0	24
Unigene16809_All	227	G	R	99	G	36	20	20	A	36	16	16	36	0.493732	1	0	28
Unigene16809_All	292	T	Y	63	T	36	25	25	C	34	8	8	33	0.689366	1	0	27
Unigene16809_All	319	C	M	99	C	35	36	36	A	37	13	13	49	0.0863937	1	0	27
Unigene16809_All	397	A	M	59	A	33	47	47	C	33	8	8	55	0.563057	1	0	78
Unigene16809_All	499	G	R	99	G	33	29	29	A	31	10	10	39	0.567991	1	0	8
Unigene16809_All	508	C	Y	99	C	37	18	18	T	36	12	12	30	0.616192	1	0	9
Unigene16809_All	686	T	Y	86	T	35	15	15	C	26	10	10	25	0.00960548	1	0	21
Unigene16809_All	810	A	C	39	C	37	15	15	A	0	0	0	15	1	1	0	13
Unigene16810_All	604	C	Y	53	C	35	18	18	T	38	6	6	24	0.705103	1	0	26
Unigene16810_All	630	C	S	99	C	34	24	24	G	33	13	13	37	0.550114	1	0	26
Unigene16810_All	711	C	Y	32	C	30	68	68	T	32	9	9	77	0.396812	1	0	45
Unigene16810_All	766	T	Y	35	T	32	66	66	C	25	10	10	76	0.116847	1	0	9
Unigene16811_All	81	T	K	99	T	35	51	51	G	38	12	12	63	0.508049	1	0	51
Unigene16811_All	132	G	K	99	G	32	46	46	T	36	14	14	60	0.0410021	1	0	51
Unigene16811_All	205	C	Y	83	C	36	73	73	T	32	13	13	86	0.0809847	1	0	18
Unigene16811_All	223	A	M	71	A	38	33	33	C	39	7	7	40	0.638287	1	0	18
Unigene16811_All	270	T	Y	68	T	31	28	28	C	32	7	7	35	0.443909	1	0	47
Unigene16811_All	472	A	R	99	A	35	46	46	G	36	19	19	65	0.439813	1	0	52
Unigene16811_All	670	C	M	99	C	33	31	31	A	30	12	12	43	0.531821	1	0	16
Unigene16811_All	960	A	R	99	A	31	61	61	G	29	34	34	95	0.395907	1	0	149
Unigene16811_All	1109	T	Y	99	T	31	52	52	C	32	28	28	80	0.136878	1	0	149
Unigene16811_All	1304	A	W	99	A	33	63	63	T	31	30	30	93	0.254116	1	0	75
Unigene16812_All	1599	G	K	84	G	38	44	44	T	36	13	13	57	0.00192091	1	0	608
Unigene16813_All	181	C	Y	99	C	38	15	15	T	39	9	9	24	0.639588	1	0	180
Unigene16813_All	439	T	Y	99	T	37	22	22	C	36	16	16	38	0.284289	1	0	75
Unigene16813_All	556	T	W	99	A	35	23	23	T	34	13	13	36	0.119683	1	0	117
Unigene16813_All	736	C	M	99	C	30	31	31	A	34	13	13	44	0.380274	1	0	9
Unigene16813_All	745	T	W	99	A	31	24	24	T	34	17	17	41	0.508583	1	0	9
Unigene16813_All	919	C	Y	99	C	36	77	77	T	35	16	16	93	0.0720433	1	0	87
Unigene16813_All	1051	G	R	96	G	33	118	118	A	36	15	15	133	0.105956	1	0	132
Unigene16813_All	1237	A	R	30	A	31	77	77	G	35	7	7	84	0.12694	1	0	186
Unigene16814_All	418	C	M	80	C	38	55	55	A	38	9	9	64	0.35324	1	0	369
Unigene16814_All	1285	C	Y	89	C	36	58	58	T	33	12	12	70	0.191424	1	0	30
Unigene16814_All	1315	C	M	99	C	37	23	23	A	39	8	8	31	0.579136	1	0	30
Unigene16815_All	267	T	Y	99	T	38	61	61	C	38	11	11	72	0.115581	1	0	37
Unigene16815_All	548	T	Y	67	T	36	46	46	C	36	9	9	55	0.477715	1	0	12
Unigene16815_All	560	G	R	99	G	36	43	43	A	32	12	12	55	0.536685	1	0	12
Unigene16815_All	635	T	W	36	T	37	52	52	A	32	7	7	59	0.0447771	1	0	75
Unigene16817_All	197	A	W	56	T	32	12	14	A	37	3	61	75	0.534066	1.8	0	7
Unigene16817_All	204	G	K	69	G	33	10	69	T	33	5	6	75	0.339327	1.8	0	7
Unigene16817_All	292	G	R	48	A	36	9	15	G	36	3	27	42	0.65	1.71429	0	20
Unigene16817_All	319	T	G	43	G	33	19	22	T	0	0	0	22	1	1.18182	0	7
Unigene16817_All	360	G	R	48	G	34	7	9	A	38	6	6	15	0.534382	1.2	0	13
Unigene16818_All	279	T	Y	99	T	37	10	10	C	37	7	7	17	0.721694	1	0	324
Unigene16818_All	1008	A	R	22	A	35	51	51	G	34	7	7	58	0.0811641	1	0	72
Unigene16818_All	1080	G	S	76	G	34	77	77	C	36	8	8	85	0.478995	1	0	72
Unigene16818_All	1311	T	W	99	T	34	46	46	A	38	13	13	59	0.587639	1	0	176
Unigene16818_All	1487	G	R	99	G	37	94	94	A	34	21	21	115	0.036302	1	0	94
Unigene16818_All	1581	T	Y	99	T	31	64	64	C	34	39	39	103	0.0626136	1	0	94
Unigene16819_All	601	A	R	90	A	38	13	13	G	36	7	7	20	0.520279	1	0	15
Unigene16819_All	933	C	Y	23	C	37	38	51	T	30	8	9	60	0.0734875	1.46667	0	6
Unigene16819_All	939	G	S	99	G	35	44	59	C	37	9	9	69	0.421564	1.43478	0	6
Unigene16819_All	970	T	K	39	T	36	66	89	G	35	9	9	98	0.0933153	1.46939	0	14
Unigene16819_All	984	T	Y	57	T	37	71	93	C	35	10	10	103	0.442921	1.42718	0	14
Unigene16819_All	1004	A	R	75	A	38	68	78	G	37	12	22	100	0.124652	1.4	0	16
Unigene16820_All	543	C	M	48	C	33	19	19	A	37	5	5	24	0.0799925	1	0	518
Unigene16820_All	1519	G	R	99	G	38	9	9	A	38	9	9	18	0.75	1	0	46
Unigene16820_All	1943	A	W	99	A	38	48	48	T	38	10	10	58	0.471731	1	0	231
Unigene16821_All	511	C	M	99	C	34	51	51	A	35	16	16	68	0.305954	1	0	11
Unigene16821_All	522	C	Y	99	C	33	54	54	T	33	16	16	70	0.307303	1	0	11
Unigene16821_All	538	G	R	93	G	34	45	45	A	31	11	11	56	0.64217	1	0	16
Unigene16821_All	705	C	Y	58	C	39	10	10	T	39	5	5	15	0.669664	1	0	167
Unigene16823_All	106	T	K	34	T	38	83	83	G	36	10	10	93	0.0751294	1	0	12
Unigene16823_All	118	G	R	99	G	37	94	94	A	34	27	27	121	0.000571524	1	0	12
Unigene16823_All	211	C	Y	99	C	32	137	137	T	32	14	14	151	0.245195	1	0	12
Unigene16823_All	223	C	Y	99	C	32	126	126	T	33	23	23	149	0.429111	1	0	12
Unigene16823_All	277	T	W	99	T	36	128	128	A	35	16	16	145	0.377716	1	0	18
Unigene16823_All	313	G	R	99	G	35	67	67	A	36	16	16	83	0.345217	1	0	36
Unigene16823_All	355	G	R	70	G	33	37	37	A	37	8	8	45	0.56464	1	0	42
Unigene16823_All	406	C	Y	99	C	37	40	40	T	38	12	12	52	0.676881	1	0	51
Unigene16823_All	577	T	Y	69	T	31	38	38	C	37	8	8	46	0.501133	1	0	27
Unigene16823_All	607	T	Y	90	T	36	39	39	C	37	11	11	50	0.621933	1	0	9
Unigene16823_All	691	G	S	99	G	34	13	13	C	39	7	7	20	0.539358	1	0	6
Unigene16823_All	744	G	R	71	A	31	14	14	G	32	6	6	20	0.588261	1	0	11
Unigene16823_All	811	G	R	99	G	34	19	19	A	29	10	10	30	0.506861	1	0	11
Unigene16823_All	850	G	R	59	G	33	32	32	A	32	8	8	40	0.376371	1	0	27
Unigene16823_All	1294	G	R	86	G	34	15	15	A	35	7	7	22	0.75	1	0	5
Unigene16823_All	1299	C	Y	66	C	34	15	15	T	30	7	7	22	0.105034	1	0	5
Unigene16823_All	1339	T	Y	47	T	30	13	13	C	37	5	5	18	0.0229925	1	0	40
Unigene16823_All	1780	A	R	45	A	28	19	19	G	29	6	6	25	0.320926	1	0	129
Unigene16824_All	330	A	R	99	A	34	24	24	G	36	12	12	36	0.629564	1	0	303
Unigene16824_All	633	C	Y	50	C	37	9	9	T	36	5	5	14	0.5	1	0	12
Unigene16824_All	645	A	R	99	G	34	14	14	A	37	10	10	24	0.420376	1	0	12
Unigene16826_All	696	G	R	67	G	36	9	9	A	38	7	7	16	0.634003	1	0	840
Unigene16826_All	1536	A	W	72	A	36	24	24	T	37	6	6	30	0.640132	1	0	840
Unigene16827_All	236	C	Y	23	C	37	32	32	T	40	6	6	38	0.0858053	1	0	169
Unigene16828_All	777	G	R	99	G	33	12	12	A	37	9	9	21	0.520386	1	0	161
Unigene16828_All	1169	A	R	99	A	37	9	9	G	37	7	7	16	0.729545	1	0	189
Unigene16828_All	1682	A	W	49	A	35	27	27	T	37	6	6	33	0.674729	1	0	150
Unigene16828_All	1832	G	R	72	A	36	11	11	G	36	5	5	16	0.1337	1	0	150
Unigene1682_All	239	G	R	96	G	37	101	101	A	36	13	13	114	0.0414661	1	0	29
Unigene16830_All	138	G	R	99	G	28	176	176	A	29	27	27	203	0.471251	1	0	15
Unigene16830_All	153	G	R	62	G	32	245	245	A	32	10	10	342	0.0969541	1	0	15
Unigene16830_All	234	G	R	99	G	32	164	164	A	35	50	50	215	0.00946912	1	0	81
Unigene16830_All	420	T	Y	99	T	34	125	125	C	35	74	74	200	0.223937	1	0	57
Unigene16830_All	477	A	W	99	A	30	121	121	T	31	25	25	146	0.489639	1	0	57
Unigene16830_All	705	G	R	99	G	36	161	161	A	35	23	23	184	0.470806	1	0	6
Unigene16830_All	711	G	S	99	G	33	103	103	C	35	73	73	177	0.0592092	1	0	6
Unigene16830_All	753	T	Y	99	T	35	63	63	C	33	49	49	112	0.40271	1	0	39
Unigene16830_All	792	T	W	99	T	31	88	88	A	31	33	33	121	0.271536	1	0	39
Unigene16830_All	843	G	R	99	G	34	80	80	A	35	14	14	94	0.487292	1	0	51
Unigene16830_All	996	G	R	25	G	34	62	62	A	29	9	9	71	0.290118	1	0	51
Unigene16830_All	1218	T	W	99	T	35	42	42	A	33	15	15	57	0.201716	1	0	42
Unigene16830_All	1260	G	R	99	G	36	51	51	A	36	13	13	64	0.493343	1	0	42
Unigene16830_All	1614	G	K	61	G	35	56	56	T	36	8	8	64	0.185876	1	0	75
Unigene16830_All	1689	G	R	99	G	35	84	84	A	37	17	17	101	0.264076	1	0	6
Unigene16830_All	1695	C	Y	99	C	33	113	113	T	35	18	18	131	0.0801689	1	0	6
Unigene16830_All	1782	G	R	99	G	35	121	121	A	32	40	40	161	0.00343316	1	0	33
Unigene16830_All	1815	C	Y	99	C	35	147	147	T	34	15	15	162	0.113592	1	0	33
Unigene16830_All	1886	G	R	99	G	35	115	115	A	34	22	22	137	0.357029	1	0	58
Unigene16830_All	1944	C	Y	99	C	35	123	123	T	36	21	21	144	0.268624	1	0	16
Unigene16830_All	1960	G	K	99	G	34	91	91	T	36	15	15	106	0.206018	1	0	16
Unigene16830_All	2004	T	Y	99	T	33	75	75	C	30	28	28	104	0.176116	1	0	44
Unigene16831_All	768	T	Y	87	T	37	31	31	C	33	9	9	41	0.636186	1	0	1049
Unigene16833_All	1620	G	R	26	G	34	23	23	A	28	8	8	31	0.0190637	1	0	1553
Unigene16835_All	116	A	R	47	A	34	30	30	G	34	7	7	37	0.106349	1	0	99
Unigene16835_All	215	T	Y	99	C	33	14	23	T	26	15	21	44	0.165702	1.34091	0	46
Unigene16835_All	261	A	M	87	A	29	7	12	C	33	6	6	18	0.591492	1.27778	0	46
Unigene16836_All	340	G	R	35	G	36	16	16	A	32	5	5	21	0.551993	1	0	117
Unigene16836_All	457	C	M	99	C	34	22	22	A	37	12	12	39	0.521763	1	0	6
Unigene16836_All	463	G	R	99	G	34	28	28	A	36	12	12	40	0.402314	1	0	6
Unigene16836_All	622	C	Y	63	C	29	24	24	T	36	7	7	31	0.0423517	1	0	147
Unigene16836_All	769	C	Y	63	C	36	11	11	T	33	6	6	17	0.108032	1	0	147
Unigene16837_All	719	G	R	79	G	36	61	61	A	37	11	11	72	0.490634	1	0	222
Unigene16837_All	941	T	Y	99	T	33	60	60	C	34	27	27	87	0.353398	1	0	222
Unigene16837_All	1343	G	S	46	G	34	64	64	C	36	6	6	70	0.203639	1	0	21
Unigene16837_All	1364	A	R	20	A	38	35	35	G	39	6	6	41	0.656741	1	0	21
Unigene16838_All	395	C	M	93	C	32	46	46	A	34	10	10	56	0.404303	1	0	395
Unigene16838_All	790	T	K	96	T	34	42	42	G	38	10	10	52	0.0885652	1	0	65
Unigene16838_All	855	C	Y	99	C	34	62	62	T	36	46	46	108	0.277516	1	0	65
Unigene16838_All	1114	A	W	99	A	36	46	46	T	34	26	26	72	0.141699	1	0	259
Unigene1683_All	239	T	Y	99	C	36	12	12	T	38	8	8	20	0.236334	1	0	437
Unigene16841_All	481	A	W	99	T	38	13	13	A	35	13	13	26	0.194845	1	0	41
Unigene16841_All	1574	T	Y	26	T	37	24	24	C	34	5	5	29	0.580733	1	0	417
Unigene16841_All	1991	T	Y	99	T	35	40	40	C	37	31	31	71	0.0155267	1	0	417
Unigene16842_All	429	T	Y	99	C	36	47	47	T	38	33	33	80	0.0667807	1	0	184
Unigene16843_All	560	C	Y	99	C	36	38	38	T	37	11	11	49	0.439008	1	0	8
Unigene16843_All	568	T	Y	99	T	34	37	37	C	37	15	15	52	0.0469501	1	0	8
Unigene16843_All	710	T	W	99	T	37	20	20	A	39	17	17	37	0.0208445	1	0	142
Unigene16843_All	1529	A	R	93	G	36	9	9	A	31	7	7	16	0.126136	1	0	51
Unigene16843_All	1580	T	Y	99	T	39	18	18	C	36	11	11	29	0.500214	1	0	25
Unigene16843_All	1654	A	R	96	A	38	26	26	G	35	9	9	35	0.552542	1	0	43
Unigene16843_All	1862	C	Y	79	C	36	26	26	T	37	8	8	34	0.428961	1	0	208
Unigene16845_All	148	C	Y	68	C	32	15	15	T	35	7	7	22	0.245104	1	0	24
Unigene16845_All	172	A	R	72	G	34	22	22	A	38	6	6	28	0.321314	1	0	24
Unigene16847_All	146	C	S	98	C	36	23	23	G	38	7	7	30	0.424019	1	0	25
Unigene16847_All	210	T	Y	89	T	33	21	21	C	38	7	7	28	0.53148	1	0	15
Unigene16847_All	225	T	Y	99	T	37	16	16	C	38	13	13	29	0.187179	1	0	15
Unigene16847_All	492	A	R	91	A	35	32	32	G	36	9	9	41	0.349375	1	0	21
Unigene16847_All	513	T	Y	99	T	31	24	24	C	32	12	12	40	0.635005	1	0	21
Unigene16847_All	957	A	R	99	A	35	82	82	G	35	31	31	113	0.283418	1	0	66
Unigene16847_All	1023	A	R	76	A	32	46	46	G	31	12	12	58	0.1733	1	0	66
Unigene16847_All	1094	G	S	99	G	36	55	55	C	34	19	19	75	0.0492777	1	0	37
Unigene16847_All	1131	C	Y	99	C	35	40	40	T	35	13	13	53	0.487787	1	0	14
Unigene16847_All	1145	A	R	95	A	36	25	25	G	36	9	9	34	0.682508	1	0	14
Unigene16848_All	148	A	M	99	C	35	22	22	A	30	20	20	42	0.0100313	1	0	27
Unigene16848_All	235	T	Y	99	T	32	41	41	C	32	20	20	61	0.460573	1	0	57
Unigene16848_All	331	C	Y	99	C	33	83	83	T	33	14	14	98	0.327602	1	0	96
Unigene16848_All	478	C	Y	99	C	34	145	145	T	35	50	50	195	0.153864	1	0	9
Unigene16848_All	493	C	Y	99	C	34	169	169	T	31	29	29	198	0.197491	1	0	12
Unigene16848_All	505	C	Y	99	C	33	190	190	T	35	40	40	231	0.24462	1	0	12
Unigene16848_All	529	C	Y	22	C	35	204	204	T	34	9	9	213	0.327205	1	0	24
Unigene16848_All	597	C	S	99	C	34	149	149	G	36	12	12	161	0.475621	1	0	68
Unigene16848_All	721	C	Y	99	C	36	77	77	T	37	22	22	99	0.384158	1	0	24
Unigene16848_All	745	A	W	99	A	34	74	74	T	36	26	26	100	0.0233978	1	0	6
Unigene16848_All	751	T	K	99	T	31	47	47	G	35	29	29	88	0.00163817	1	0	6
Unigene16848_All	773	G	R	99	G	31	43	43	A	35	23	23	66	0.0134243	1	0	22
Unigene16848_All	802	C	Y	99	C	35	50	50	T	36	26	26	76	0.336682	1	0	29
Unigene16848_All	868	G	K	99	G	35	61	61	T	37	23	23	84	0.0570635	1	0	30
Unigene16848_All	898	A	R	99	A	34	49	49	G	28	13	13	63	0.114552	1	0	30
Unigene16848_All	1132	C	M	46	C	34	62	62	A	33	8	8	71	0.328873	1	0	18
Unigene16848_All	1150	A	W	99	A	35	60	60	T	36	11	11	71	0.308338	1	0	18
Unigene16848_All	1177	C	S	85	C	35	38	38	G	37	19	19	69	0.00580388	1	0	27
Unigene16848_All	1237	A	R	68	A	36	82	82	G	36	10	10	93	0.477492	1	0	60
Unigene16848_All	1297	T	K	90	T	35	101	101	G	38	11	11	112	0.0449178	1	0	9
Unigene16848_All	1306	C	Y	63	C	35	96	96	T	38	10	10	106	0.0722634	1	0	6
Unigene16848_All	1312	G	R	99	G	34	63	63	A	36	53	53	116	0.271046	1	0	6
Unigene16848_All	1516	C	Y	99	C	37	181	181	T	37	74	74	308	0.447906	1	0	6
Unigene16848_All	1522	G	S	99	G	37	176	176	C	37	73	73	370	0.0916305	1	0	6
Unigene16848_All	1587	G	R	99	G	36	229	229	A	38	25	25	366	0.0785517	1	0	19
Unigene16848_All	1606	C	M	99	C	36	237	237	A	37	18	18	402	0.304277	1	0	15
Unigene16848_All	1621	T	Y	89	T	37	237	237	C	36	18	18	351	0.281485	1	0	15
Unigene16848_All	1696	A	R	99	A	37	169	169	G	37	85	85	350	0.343246	1	0	75
Unigene16848_All	1822	C	Y	99	C	36	184	184	T	37	45	45	236	0.0333481	1	0	99
Unigene16848_All	1921	A	R	99	A	33	100	100	G	34	11	11	111	0.258998	1	0	10
Unigene16848_All	1931	T	Y	99	T	34	88	88	C	31	22	22	110	0.00839537	1	0	5
Unigene16848_All	1936	C	Y	28	C	34	99	99	T	32	9	9	108	0.213372	1	0	5
Unigene16848_All	2005	C	Y	99	C	37	231	231	T	39	24	24	418	0.00893324	1	0	21
Unigene16848_All	2026	T	Y	99	T	36	210	210	C	36	45	45	423	0.235611	1	0	9
Unigene16848_All	2035	C	Y	99	C	34	141	141	T	34	114	114	416	0.0205984	1	0	9
Unigene16848_All	2125	G	R	99	G	37	233	233	A	36	22	22	695	0.0877486	1	0	45
Unigene16848_All	2170	G	R	99	G	32	216	216	A	32	39	39	329	0.156906	1	0	45
Unigene16850_All	466	T	Y	99	T	33	40	40	C	37	33	33	74	0.000747952	1	0	47
Unigene16850_All	681	G	A	99	A	35	74	74	G	0	0	0	74	1	1	0	168
Unigene16850_All	997	T	Y	99	C	35	40	40	T	34	27	27	68	0.369812	1	0	316
Unigene16851_All	1314	G	R	99	A	37	22	22	G	36	17	17	39	0.228679	1	0	701
Unigene16851_All	2113	T	W	99	T	37	51	51	A	37	43	43	94	0.312237	1	0	98
Unigene16852_All	158	C	M	99	A	37	57	57	C	37	14	14	71	0.394596	1	0	73
Unigene16852_All	499	C	Y	99	T	37	45	45	C	35	22	22	67	0.0168839	1	0	93
Unigene16852_All	592	T	Y	99	C	36	48	48	T	35	26	26	74	0.295347	1	0	84
Unigene16852_All	676	C	Y	99	T	37	26	26	C	37	15	15	42	0.484005	1	0	84
Unigene16852_All	895	C	Y	99	C	36	25	25	T	37	23	23	48	0.556409	1	0	45
Unigene16852_All	940	C	S	99	C	38	12	12	G	35	8	8	20	0.0674684	1	0	12
Unigene16852_All	952	C	Y	99	T	36	12	12	C	37	10	10	22	0.730717	1	0	12
Unigene16852_All	1005	T	Y	99	C	35	52	52	T	34	19	19	71	0.174857	1	0	49
Unigene16852_All	1054	G	K	99	T	37	49	49	G	37	16	16	65	0.17254	1	0	49
Unigene16852_All	1177	T	K	99	G	36	75	75	T	37	20	20	95	0.317503	1	0	30
Unigene16852_All	1207	T	Y	71	C	37	45	45	T	38	8	8	53	0.192413	1	0	30
Unigene16853_All	125	C	Y	65	C	38	5	5	T	35	5	5	10	0.420635	1	0	15
Unigene16853_All	140	G	A	29	A	39	11	11	G	0	0	0	11	1	1	0	15
Unigene16853_All	270	A	R	48	A	36	20	20	G	39	6	6	26	0.0694783	1	0	5
Unigene16853_All	275	C	Y	99	C	35	16	16	T	38	10	10	27	0.0911922	1	0	5
Unigene16853_All	362	C	M	99	A	38	11	11	C	39	9	9	20	0.65067	1	0	28
Unigene16854_All	1801	G	K	99	G	37	65	65	T	37	20	20	85	0.0915468	1	0	462
Unigene16855_All	54	C	M	60	C	34	9	9	A	39	5	5	14	0.0034965	1	0	33
Unigene16855_All	87	A	R	99	G	36	13	13	A	35	7	7	20	0.19644	1	0	33
Unigene16855_All	189	A	W	99	A	35	18	18	T	33	16	16	34	0.527332	1	0	102
Unigene16855_All	309	T	C	32	C	33	20	20	T	34	1	1	21	1	1	0	60
Unigene16855_All	369	T	Y	84	T	34	8	8	C	37	6	6	14	0.688645	1	0	60
Unigene16855_All	593	G	R	99	G	35	42	42	A	38	18	18	60	0.00177592	1	0	178
Unigene16855_All	771	T	Y	99	T	33	16	16	C	34	8	8	24	0.613075	1	0	12
Unigene16855_All	783	A	M	99	A	36	15	15	C	35	7	7	22	0.445328	1	0	12
Unigene16855_All	798	C	M	99	C	35	19	19	A	34	9	9	28	0.0782148	1	0	15
Unigene16856_All	87	C	Y	60	C	29	20	20	T	37	6	6	26	0.502163	1	0	156
Unigene16857_All	31	A	R	82	A	38	9	9	G	40	7	7	16	0.52854	1	0	111
Unigene16857_All	142	A	W	99	A	38	11	11	T	36	7	7	18	0.606288	1	0	20
Unigene16857_All	499	C	Y	99	C	35	83	83	T	33	38	38	121	0.0404803	1	0	337
Unigene16857_All	1137	C	M	69	C	35	29	29	A	37	6	6	35	0.70364	1	0	258
Unigene16857_All	1492	T	C	66	C	38	25	25	T	0	0	0	25	1	1	0	36
Unigene16857_All	1528	T	K	99	G	36	16	16	T	37	8	8	24	0.488052	1	0	36
Unigene16857_All	1585	G	R	85	G	36	16	16	A	38	9	9	25	0.0213977	1	0	57
Unigene16857_All	1683	A	R	50	A	38	45	45	G	36	9	9	54	0.126294	1	0	98
Unigene16858_All	215	C	M	92	C	37	8	8	A	32	6	6	14	0.28638	1	0	42
Unigene16858_All	445	T	Y	85	T	38	17	17	C	39	7	7	24	0.104706	1	0	89
Unigene1685_All	244	A	R	99	A	34	41	41	G	34	18	18	60	0.621916	1	0	401
Unigene16860_All	2274	C	Y	42	C	35	176	176	T	38	11	11	187	0.04794	1	0	33
Unigene16860_All	2307	T	Y	82	T	28	180	180	C	32	14	14	199	0.00302474	1	0	33
Unigene16861_All	396	G	S	99	C	36	21	21	G	36	15	15	36	0.132567	1	0	130
Unigene16861_All	733	T	W	50	T	31	36	36	A	34	6	6	42	0.539874	1	0	93
Unigene16862_All	156	C	Y	99	T	35	17	17	C	37	15	15	32	0.5284	1	0	37
Unigene16862_All	272	T	Y	99	T	35	64	64	C	33	27	27	91	0.0790021	1	0	116
Unigene16862_All	669	G	R	76	G	35	65	65	A	37	10	10	75	0.142845	1	0	100
Unigene16862_All	1242	C	M	99	C	37	40	40	A	36	25	25	65	0.283299	1	0	74
Unigene16862_All	1316	T	Y	96	T	36	19	19	C	34	8	8	27	0.224667	1	0	14
Unigene16862_All	1330	C	S	99	C	37	27	27	G	36	10	10	37	0.24472	1	0	14
Unigene16862_All	1643	G	K	99	G	37	20	20	T	34	10	10	30	0.0122121	1	0	313
Unigene16863_All	118	T	Y	99	C	37	9	10	T	40	6	6	16	0.528372	1.0625	0	14
Unigene16864_All	423	C	M	99	C	35	13	13	A	37	8	8	21	0.593439	1	0	42
Unigene16864_All	465	C	M	99	C	34	8	8	A	37	6	6	14	0.141192	1	0	15
Unigene16864_All	618	G	R	63	A	31	6	6	G	36	5	5	12	0.396104	1	0	24
Unigene16864_All	663	C	Y	99	C	33	17	17	T	36	10	10	27	0.551093	1	0	42
Unigene16864_All	705	T	Y	22	T	29	24	24	C	32	6	6	30	0.201064	1	0	42
Unigene16864_All	831	T	Y	99	T	35	16	16	C	36	9	9	25	0.659207	1	0	6
Unigene16864_All	859	C	Y	57	C	31	21	21	T	34	6	6	27	0.647211	1	0	22
Unigene16864_All	910	G	R	99	G	34	28	28	A	36	12	12	40	0.652556	1	0	5
Unigene16864_All	915	G	R	99	G	34	27	27	A	34	12	12	39	0.422703	1	0	5
Unigene16864_All	973	G	K	99	G	31	18	18	T	34	8	8	29	0.36181	1	0	17
Unigene16864_All	990	T	W	58	T	34	14	14	A	34	10	10	31	0.312548	1	0	15
Unigene16864_All	1060	A	R	86	A	35	22	22	G	37	8	8	30	0.580052	1	0	9
Unigene16864_All	1191	C	M	99	A	37	47	47	C	37	38	38	85	0.36018	1	0	35
Unigene16864_All	1320	A	M	99	A	39	45	45	C	37	26	26	74	0.0473673	1	0	48
Unigene16865_All	392	C	Y	39	C	34	13	13	T	36	5	5	18	0.251401	1	0	12
Unigene16865_All	520	T	K	54	T	33	15	15	G	33	5	5	20	0.248646	1	0	27
Unigene16865_All	547	A	W	99	A	32	11	11	T	34	9	9	20	0.327816	1	0	27
Unigene16865_All	684	C	S	96	C	35	8	8	G	33	6	6	14	0.206793	1	0	51
Unigene16865_All	735	T	Y	95	T	34	9	9	C	34	7	7	16	0.0208916	1	0	51
Unigene16866_All	693	A	R	79	A	36	22	22	G	38	7	7	29	0.554309	1	0	27
Unigene16866_All	1639	A	R	87	A	35	45	45	G	36	11	11	56	0.37245	1	0	173
Unigene16866_All	1812	A	R	85	A	36	139	139	G	38	15	15	154	0.228615	1	0	5
Unigene16866_All	1827	A	W	99	A	36	148	148	T	39	17	17	165	0.0168919	1	0	7
Unigene16866_All	1853	A	R	99	A	35	101	101	G	34	43	43	144	0.120583	1	0	26
Unigene16866_All	1953	C	M	99	C	35	212	212	A	32	31	31	243	0.0080055	1	0	74
Unigene16867_All	109	T	Y	99	T	37	15	15	C	36	10	10	25	0.632636	1	0	440
Unigene16867_All	696	A	M	99	C	36	27	27	A	38	25	25	52	0.121706	1	0	147
Unigene16867_All	961	G	K	99	G	36	34	34	T	35	15	15	49	0.601951	1	0	51
Unigene16867_All	1301	T	Y	99	T	39	22	22	C	39	14	14	36	0.678153	1	0	18
Unigene16868_All	287	A	R	99	A	38	46	46	G	38	29	29	75	0.323859	1	0	12
Unigene16868_All	299	A	W	99	A	37	68	68	T	37	29	29	97	0.322407	1	0	12
Unigene16868_All	327	C	Y	99	C	36	217	217	T	37	38	38	370	0.235017	1	0	28
Unigene16868_All	396	A	M	99	A	36	216	216	C	37	39	39	1424	0.230871	1	0	69
Unigene16868_All	477	G	S	99	G	35	211	211	C	35	44	44	1310	0.338406	1	0	62
Unigene16868_All	539	T	W	99	T	34	218	218	A	35	34	34	1002	0.415862	1	0	62
Unigene16870_All	189	A	R	99	A	34	43	43	G	32	33	33	76	0.0126287	1	0	15
Unigene16870_All	204	G	R	99	A	33	47	47	G	27	29	29	77	0.000393188	1	0	8
Unigene16870_All	354	T	W	30	T	31	68	68	A	32	6	6	74	0.484204	1	0	30
Unigene16870_All	384	T	K	99	G	27	21	21	T	30	16	16	37	0.532575	1	0	30
Unigene16870_All	418	C	Y	99	C	32	49	49	T	28	18	18	67	0.00626977	1	0	34
Unigene16870_All	482	C	S	99	C	34	26	26	G	32	13	13	39	0.747069	1	0	29
Unigene16870_All	511	C	M	99	C	31	18	18	A	33	9	9	27	0.489944	1	0	29
Unigene16870_All	759	A	R	99	A	35	30	30	G	30	15	15	45	0.519156	1	0	26
Unigene16870_All	889	T	Y	99	T	35	24	24	C	33	12	12	36	0.694651	1	0	71
Unigene16870_All	960	T	Y	96	T	25	28	28	C	29	11	11	39	0.612548	1	0	71
Unigene16870_All	1070	T	Y	99	T	35	19	19	C	36	17	17	36	0.319281	1	0	110
Unigene16870_All	1191	A	R	75	A	35	10	10	G	32	6	6	16	0.478896	1	0	18
Unigene16870_All	1624	T	Y	65	T	38	12	12	C	32	6	6	18	0.583872	1	0	21
Unigene16870_All	1645	T	W	73	T	39	12	12	A	35	6	6	18	0.0734755	1	0	21
Unigene16870_All	1795	C	Y	99	C	34	14	14	T	35	10	10	24	0.254004	1	0	148
Unigene16870_All	1943	T	Y	90	T	38	13	13	C	37	6	6	19	0.741523	1	0	32
Unigene16870_All	1975	G	R	79	G	34	12	12	A	34	6	6	18	0.445809	1	0	18
Unigene16870_All	1993	T	K	73	G	36	5	5	T	33	5	5	10	0.0753968	1	0	12
Unigene16870_All	2005	C	Y	86	C	28	12	12	T	31	7	7	19	0.483568	1	0	9
Unigene16870_All	2014	T	Y	99	T	32	12	12	C	34	9	9	21	0.743068	1	0	9
Unigene16870_All	2026	C	M	35	A	29	8	8	C	33	7	7	19	0.694716	1	0	12
Unigene16870_All	2101	A	M	97	A	33	10	10	C	35	7	7	17	0.578697	1	0	15
Unigene16870_All	2116	A	M	96	C	36	10	10	A	32	5	5	15	0.577423	1	0	15
Unigene16871_All	1045	C	S	99	C	35	24	24	G	36	16	16	40	0.472816	1	0	222
Unigene16871_All	1267	T	Y	99	T	38	70	70	C	37	21	21	91	0.130155	1	0	87
Unigene16871_All	1354	A	R	99	A	35	99	99	G	36	22	22	121	0.271535	1	0	87
Unigene16871_All	1604	T	W	34	T	36	40	40	A	37	6	6	46	0.590447	1	0	75
Unigene16871_All	1679	C	Y	99	C	37	22	22	T	34	21	21	43	0.532462	1	0	75
Unigene16871_All	2185	C	M	36	C	37	63	63	A	38	7	7	71	0.461012	1	0	5
Unigene16871_All	2203	G	R	99	G	37	38	38	A	37	38	38	76	0.0773314	1	0	18
Unigene16871_All	2339	A	W	99	A	36	109	109	T	37	18	18	127	0.495864	1	0	109
Unigene16871_All	2448	T	Y	75	T	34	102	102	C	37	11	11	113	0.146647	1	0	92
Unigene16871_All	2613	T	W	99	T	37	112	112	A	34	12	12	124	0.193167	1	0	38
Unigene16871_All	2664	T	Y	96	T	36	104	104	C	37	14	14	118	0.235803	1	0	8
Unigene16871_All	2824	G	R	60	G	36	183	183	A	35	11	11	195	0.367956	1	0	69
Unigene16871_All	2893	G	K	39	G	36	231	231	T	31	11	11	242	0.0159001	1	0	25
Unigene16871_All	2918	T	Y	40	T	35	244	244	C	37	11	11	270	0.021446	1	0	25
Unigene16873_All	160	A	R	99	A	37	105	105	G	36	58	58	164	0.137065	1	0	27
Unigene16873_All	259	A	R	99	A	37	105	105	G	36	50	50	155	0.0264981	1	0	68
Unigene16874_All	196	G	S	99	G	35	40	40	C	34	11	11	51	0.107652	1	0	57
Unigene16875_All	31	G	R	99	G	35	22	22	A	37	12	12	34	0.101991	1	0	304
Unigene16875_All	335	A	R	95	A	34	110	110	G	33	14	14	124	0.0580694	1	0	224
Unigene16875_All	559	C	Y	99	C	36	15	15	T	37	13	13	28	0.262478	1	0	224
Unigene16875_All	1000	A	W	84	A	36	34	34	T	32	9	9	43	0.529575	1	0	57
Unigene16875_All	1057	T	Y	99	T	34	49	49	C	33	12	12	61	0.709212	1	0	40
Unigene16875_All	1097	A	R	99	A	36	34	34	G	34	15	15	49	0.595937	1	0	40
Unigene16876_All	28	C	T	26	T	37	10	10	C	0	0	0	10	1	1	0	8
Unigene16876_All	158	T	W	47	A	36	38	38	T	36	5	5	43	0.717198	1	0	16
Unigene16876_All	174	A	T	65	T	35	64	64	A	34	1	1	65	1	1	0	16
Unigene16876_All	512	G	K	93	G	32	30	30	T	35	8	8	38	0.193818	1	0	31
Unigene16876_All	567	T	K	48	T	37	15	15	G	39	5	5	20	0.174278	1	0	55
Unigene16878_All	378	A	W	97	A	38	12	12	T	31	7	7	19	0.529958	1	0	222
Unigene16878_All	600	A	R	49	A	32	19	19	G	35	6	6	26	0.257109	1	0	222
Unigene16878_All	965	C	M	99	C	38	13	13	A	38	7	7	20	0.469234	1	0	322
Unigene16879_All	115	T	W	66	T	37	19	19	A	35	6	6	25	0.0689046	1	0	8
Unigene1687_All	137	T	Y	99	T	36	20	20	C	36	15	15	35	0.74672	1	0	113
Unigene1687_All	250	A	R	99	A	34	19	19	G	36	11	11	30	0.153513	1	0	113
Unigene16880_All	162	C	Y	99	C	35	37	37	T	32	18	18	55	0.672314	1	0	21
Unigene16880_All	183	G	R	99	G	35	38	38	A	36	31	31	69	0.321166	1	0	21
Unigene16880_All	216	G	R	99	G	36	56	56	A	37	43	43	99	0.295804	1	0	33
Unigene16880_All	379	C	S	99	C	36	71	71	G	37	12	12	83	0.230232	1	0	22
Unigene16880_All	401	C	Y	50	C	36	75	75	T	38	10	10	85	0.251954	1	0	22
Unigene16880_All	987	C	Y	58	C	36	37	37	T	33	8	8	45	0.511733	1	0	303
Unigene16880_All	1419	C	Y	22	C	36	37	37	T	35	7	7	44	0.0986303	1	0	129
Unigene16881_All	209	C	Y	42	C	34	27	27	T	36	6	6	33	0.634555	1	0	57
Unigene16881_All	836	A	W	99	A	37	10	10	T	29	10	10	20	0.0144028	1	0	210
Unigene16881_All	1046	A	R	93	A	32	9	9	G	34	6	6	15	0.387812	1	0	210
Unigene16883_All	402	G	R	99	G	37	26	26	A	37	20	20	46	0.318484	1	0	48
Unigene16883_All	450	T	W	99	A	33	25	25	T	35	19	19	45	0.24795	1	0	48
Unigene16883_All	795	G	R	99	G	32	17	17	A	33	12	12	29	0.422289	1	0	345
Unigene16884_All	74	T	Y	99	T	39	19	19	C	36	10	10	29	0.643138	1	0	46
Unigene16884_All	120	G	S	77	C	37	23	23	G	35	5	5	28	0.0687854	1	0	13
Unigene16884_All	133	A	M	99	C	32	14	14	A	34	10	10	24	0.744275	1	0	13
Unigene16888_All	301	T	K	80	T	34	30	30	G	34	8	8	38	0.684674	1	0	90
Unigene16888_All	391	T	Y	37	T	31	27	27	C	31	7	7	34	0.22593	1	0	14
Unigene16888_All	405	A	R	49	A	35	27	27	G	38	6	6	33	0.560213	1	0	14
Unigene16888_All	419	T	W	59	T	33	28	28	A	36	6	6	34	0.543173	1	0	14
Unigene16888_All	1105	C	Y	81	C	35	26	26	T	34	8	8	34	0.281631	1	0	36
Unigene16888_All	1141	A	R	99	G	37	23	23	A	36	16	16	39	0.427261	1	0	36
Unigene16888_All	1282	T	W	99	T	36	21	21	A	38	9	9	30	0.619028	1	0	60
Unigene16888_All	1621	C	Y	99	C	35	38	38	T	35	33	33	71	0.290004	1	0	13
Unigene16888_All	1634	A	R	99	A	36	39	39	G	36	34	34	73	0.219434	1	0	13
Unigene16888_All	1753	A	R	99	A	38	27	27	G	36	21	21	48	0.725428	1	0	119
Unigene16888_All	2083	C	S	77	C	37	57	57	G	38	9	9	66	0.293955	1	0	37
Unigene16888_All	2120	G	R	99	G	35	32	32	A	38	13	13	45	0.0365534	1	0	37
Unigene16888_All	2158	G	K	78	G	37	92	92	T	38	10	10	102	0.185491	1	0	38
Unigene16888_All	2230	G	R	99	G	31	54	54	A	33	33	33	87	0.0769515	1	0	53
Unigene16888_All	2283	A	M	99	C	37	44	44	A	37	42	42	86	0.477609	1	0	15
Unigene16888_All	2298	T	Y	52	T	38	73	73	C	38	7	7	80	0.493208	1	0	15
Unigene16889_All	621	G	R	48	G	34	13	13	A	37	5	5	18	0.424486	1	0	108
Unigene16890_All	124	C	Y	31	C	37	54	54	T	38	8	8	62	0.414381	1	0	30
Unigene16890_All	154	T	Y	71	T	37	64	64	C	35	10	10	74	0.352168	1	0	30
Unigene16890_All	208	T	K	99	T	35	40	40	G	37	22	22	62	0.573843	1	0	29
Unigene16890_All	237	A	R	99	A	34	34	34	G	34	30	30	64	0.489267	1	0	9
Unigene16890_All	256	C	M	88	C	35	54	54	A	36	8	8	62	0.495892	1	0	7
Unigene16890_All	361	C	S	93	C	33	25	25	G	35	7	7	32	0.360692	1	0	6
Unigene16890_All	367	C	Y	35	C	35	27	27	T	35	7	7	34	0.238792	1	0	6
Unigene16890_All	415	C	Y	99	C	28	22	22	T	29	9	9	31	0.68716	1	0	30
Unigene16890_All	502	C	Y	99	T	39	11	11	C	34	10	10	21	0.50318	1	0	12
Unigene16890_All	553	A	R	99	A	35	12	12	G	34	8	8	20	0.595936	1	0	28
Unigene16890_All	685	G	R	99	G	36	20	20	A	35	11	11	31	0.574401	1	0	84
Unigene16890_All	769	T	W	55	T	30	29	29	A	31	7	7	36	0.437908	1	0	30
Unigene16890_All	799	A	M	99	A	31	21	21	C	29	12	12	33	0.145428	1	0	30
Unigene16890_All	889	G	K	52	G	32	23	23	T	35	7	7	30	0.693425	1	0	23
Unigene16890_All	981	A	R	25	A	31	20	20	G	37	5	5	25	0.0647092	1	0	9
Unigene16890_All	990	C	S	62	C	33	23	23	G	34	5	5	28	0.603195	1	0	9
Unigene16890_All	1045	C	Y	21	C	33	20	20	T	32	5	5	25	0.243798	1	0	54
Unigene16890_All	1129	G	R	22	G	36	25	25	A	36	5	5	30	0.275897	1	0	27
Unigene16890_All	1222	G	R	99	G	32	23	23	A	33	9	9	32	0.685493	1	0	6
Unigene16890_All	1228	G	R	57	G	34	25	25	A	29	7	7	32	0.663898	1	0	6
Unigene16890_All	1288	C	M	99	C	35	22	22	A	33	11	11	33	0.579199	1	0	27
Unigene16890_All	1315	C	Y	99	C	35	27	27	T	30	14	14	41	0.027659	1	0	18
Unigene16890_All	1409	A	R	98	A	36	15	15	G	34	9	9	24	0.629871	1	0	24
Unigene16890_All	1433	T	Y	99	C	36	11	11	T	36	10	10	21	0.431633	1	0	24
Unigene16894_All	492	C	Y	99	C	39	12	12	T	38	8	8	20	0.367246	1	0	18
Unigene16894_All	510	A	M	44	A	37	16	16	C	38	5	5	21	0.359477	1	0	18
Unigene16895_All	402	T	W	79	T	37	9	9	A	30	6	6	15	0.0905095	1	0	30
Unigene16896_All	67	C	M	92	C	39	6	6	A	38	5	5	11	0.732684	1	0	46
Unigene16896_All	327	A	R	99	G	38	9	9	A	37	9	9	18	0.596627	1	0	37
Unigene16896_All	444	T	Y	99	T	32	17	17	C	35	10	10	27	0.102187	1	0	36
Unigene16896_All	489	A	R	99	A	36	19	19	G	35	9	9	28	0.264794	1	0	45
Unigene16896_All	600	A	R	54	G	34	23	23	A	37	5	5	28	0.509626	1	0	63
Unigene16896_All	663	G	R	99	A	38	12	12	G	36	8	8	20	0.367246	1	0	63
Unigene16897_All	158	T	W	99	T	36	20	20	A	35	14	14	34	0.705626	1	0	6
Unigene16897_All	164	A	R	99	A	30	28	28	G	34	20	20	48	0.0527617	1	0	6
Unigene16897_All	229	C	M	99	C	35	86	86	A	36	14	14	101	0.134013	1	0	11
Unigene16897_All	240	A	W	99	A	35	94	94	T	35	14	14	108	0.180191	1	0	11
Unigene16897_All	299	G	S	99	C	36	45	45	G	35	45	45	90	0.255372	1	0	26
Unigene16897_All	325	A	R	53	A	37	67	67	G	37	8	8	75	0.214906	1	0	26
Unigene16897_All	484	C	Y	36	C	38	18	18	T	34	6	6	24	0.0400928	1	0	22
Unigene16897_All	506	A	W	97	A	34	19	19	T	33	7	7	26	0.576446	1	0	22
Unigene16897_All	634	C	Y	99	C	34	43	43	T	35	28	28	72	0.190371	1	0	112
Unigene16897_All	746	C	Y	95	C	35	40	40	T	37	20	20	60	0.312086	1	0	112
Unigene168_All	622	A	C	21	C	32	9	9	A	0	0	0	9	1	1	0	19
Unigene16900_All	241	C	Y	64	C	37	15	15	T	38	6	6	21	0.235091	1	0	34
Unigene16900_All	385	G	S	52	G	36	17	17	C	33	5	5	22	0.648648	1	0	6
Unigene16900_All	565	A	R	66	G	30	9	9	A	40	5	5	14	0.00949051	1	0	26
Unigene16901_All	351	C	Y	99	T	39	11	11	C	36	10	10	21	0.00635922	1	0	80
Unigene16901_All	482	C	M	99	A	35	11	11	C	33	7	7	18	0.0102124	1	0	131
Unigene16902_All	131	T	W	94	T	36	5	5	A	28	6	6	11	0.732684	1	0	19
Unigene16902_All	354	A	M	26	A	37	41	41	C	37	6	6	47	0.506195	1	0	34
Unigene16902_All	530	A	R	99	A	34	95	95	G	33	15	15	110	0.187155	1	0	42
Unigene16902_All	572	G	R	99	G	37	60	60	A	38	14	14	74	0.321917	1	0	12
Unigene16902_All	584	T	K	99	T	36	68	68	G	35	17	17	85	0.364642	1	0	12
Unigene16902_All	762	G	R	99	G	33	195	195	A	32	60	60	259	0.218986	1	0	178
Unigene16903_All	554	G	R	39	G	35	37	37	A	36	7	7	44	0.474986	1	0	207
Unigene16903_All	761	C	Y	99	C	36	8	8	T	39	7	7	15	0.547319	1	0	207
Unigene16905_All	125	C	M	99	A	37	30	30	C	37	17	17	47	0.734723	1	0	18
Unigene16905_All	143	G	R	99	G	35	33	33	A	33	12	12	45	0.707405	1	0	18
Unigene16907_All	158	T	C	21	C	38	18	18	T	38	1	1	19	1	1	0	104
Unigene16907_All	629	C	Y	68	C	35	12	12	T	33	7	7	19	0.58506	1	0	5
Unigene16908_All	1144	A	W	45	A	36	19	19	T	38	5	5	24	0.591744	1	0	551
Unigene16909_All	325	C	Y	24	C	37	22	22	T	37	5	5	27	0.641125	1	0	354
Unigene1690_All	166	A	R	99	A	29	23	23	G	28	15	15	38	0.709114	1	0	34
Unigene1690_All	200	C	Y	99	C	35	34	34	T	37	18	18	52	0.101478	1	0	34
Unigene1690_All	239	C	Y	99	C	36	40	40	T	38	20	20	60	0.50787	1	0	18
Unigene16910_All	43	G	K	70	G	33	12	12	T	33	6	6	18	0.308231	1	0	19
Unigene16910_All	76	A	R	76	A	34	13	13	G	39	7	7	20	0.027838	1	0	33
Unigene16910_All	192	G	R	57	G	37	12	12	A	35	8	8	20	0.0906724	1	0	9
Unigene16910_All	262	A	W	99	A	34	10	10	T	19	10	10	20	0.0615027	1	0	15
Unigene16910_All	277	C	M	99	A	26	9	9	C	35	6	6	15	0.506394	1	0	15
Unigene16910_All	467	C	Y	81	C	32	20	20	T	32	8	8	28	0.411346	1	0	39
Unigene16910_All	506	T	Y	91	T	33	14	14	C	36	7	7	21	0.563631	1	0	39
Unigene16910_All	852	T	Y	52	T	37	16	16	C	38	6	6	22	0.647508	1	0	87
Unigene16911_All	103	A	W	93	A	37	69	69	T	36	14	14	84	0.223612	1	0	9
Unigene16911_All	112	C	M	99	A	37	74	74	C	37	70	70	144	0.275066	1	0	9
Unigene16911_All	127	G	S	99	G	37	110	110	C	34	47	47	158	0.00915984	1	0	15
Unigene16911_All	169	G	S	99	G	34	127	127	C	35	16	16	143	0.143879	1	0	9
Unigene16911_All	225	A	R	99	A	35	232	232	G	36	23	23	335	0.0619924	1	0	23
Unigene16911_All	248	C	S	99	C	35	185	185	G	36	70	70	360	0.399384	1	0	13
Unigene16911_All	297	C	M	99	C	32	200	200	A	29	55	55	644	0.000181213	1	0	34
Unigene16911_All	406	A	R	75	A	34	238	238	G	31	16	16	670	0.273292	1	0	14
Unigene16911_All	420	C	Y	72	C	37	238	238	T	38	17	17	549	0.140296	1	0	14
Unigene16911_All	518	A	M	99	A	37	84	84	C	35	44	44	129	0.0249055	1	0	34
Unigene16911_All	552	T	W	99	T	35	163	163	A	34	42	42	207	0.27932	1	0	12
Unigene16911_All	564	C	M	99	C	36	136	136	A	36	61	61	197	0.0859231	1	0	12
Unigene16911_All	633	T	K	99	G	28	42	42	T	30	15	15	57	0.0232089	1	0	12
Unigene16911_All	689	C	Y	49	C	37	69	69	T	35	9	9	79	0.255632	1	0	16
Unigene16911_All	705	C	M	56	C	35	69	69	A	31	9	9	78	0.000316282	1	0	5
Unigene16911_All	793	T	W	99	T	33	99	99	A	35	38	38	141	0.0838205	1	0	8
Unigene16911_All	801	T	Y	99	T	36	110	110	C	36	42	42	152	0.231656	1	0	8
Unigene16911_All	915	A	R	99	A	36	141	141	G	37	113	113	494	0.00154122	1	0	50
Unigene16911_All	965	T	Y	99	T	29	226	226	C	32	29	29	435	0.188744	1	0	22
Unigene16911_All	987	C	Y	99	C	34	104	104	T	33	74	74	178	0.419314	1	0	22
Unigene16911_All	1017	T	W	99	T	36	153	153	A	37	102	102	327	0.423385	1	0	26
Unigene16911_All	1043	G	R	99	G	38	213	213	A	38	42	42	320	0.335974	1	0	17
Unigene16911_All	1060	A	R	99	A	35	184	184	G	35	71	71	293	0.381999	1	0	13
Unigene16913_All	378	C	Y	99	C	36	123	123	T	36	17	17	140	0.460614	1	0	180
Unigene16913_All	558	C	Y	99	C	36	226	226	T	37	29	29	317	0.0597983	1	0	159
Unigene16913_All	717	A	R	99	A	37	206	206	G	38	49	49	436	0.0675272	1	0	30
Unigene16913_All	760	A	R	99	A	35	174	174	G	36	26	26	200	0.296668	1	0	8
Unigene16913_All	798	G	K	99	G	34	168	168	T	35	25	25	195	0.224245	1	0	38
Unigene16913_All	1115	C	S	99	G	35	202	202	C	36	52	52	837	0.0406635	1	0	15
Unigene16913_All	1130	C	M	99	C	36	228	228	A	32	26	26	772	0.0821971	1	0	15
Unigene16914_All	85	C	M	28	C	37	77	77	A	35	7	7	84	0.125264	1	0	126
Unigene16914_All	236	T	K	99	T	33	17	17	G	35	16	16	33	0.657793	1	0	25
Unigene16914_All	290	C	Y	61	C	33	20	20	T	30	8	8	28	0.430833	1	0	33
Unigene16914_All	378	C	Y	99	C	35	38	38	T	37	11	11	49	0.139986	1	0	20
Unigene16914_All	398	C	S	99	C	35	32	32	G	36	26	26	58	0.608175	1	0	20
Unigene16914_All	443	C	Y	99	C	32	30	30	T	32	24	24	55	0.226034	1	0	45
Unigene16914_All	542	A	R	99	A	29	37	37	G	34	19	19	58	0.0141514	1	0	6
Unigene16914_All	548	G	R	99	G	31	34	34	A	36	16	16	50	0.574246	1	0	6
Unigene16914_All	620	G	S	99	G	34	48	48	C	33	13	13	61	0.557673	1	0	63
Unigene16914_All	683	G	K	99	G	31	23	23	T	28	21	21	47	0.531897	1	0	6
Unigene16914_All	689	C	Y	37	C	30	38	38	T	36	7	7	45	0.515358	1	0	6
Unigene16914_All	704	C	S	99	C	32	23	23	G	31	16	16	39	0.631255	1	0	15
Unigene16914_All	848	C	S	99	C	35	38	38	G	36	14	14	52	0.672704	1	0	15
Unigene16914_All	863	T	Y	99	C	36	35	35	T	36	23	23	58	0.530944	1	0	12
Unigene16914_All	875	G	K	99	G	38	43	43	T	37	15	15	58	0.129398	1	0	12
Unigene16914_All	914	C	M	99	C	35	24	24	A	35	18	18	42	0.221171	1	0	17
Unigene16914_All	931	T	W	93	T	26	38	38	A	22	10	10	48	0.0927915	1	0	17
Unigene16914_All	1106	G	R	99	G	36	64	64	A	39	27	27	92	0.057912	1	0	39
Unigene16914_All	1145	C	Y	99	C	35	73	73	T	38	24	24	97	0.010871	1	0	34
Unigene16914_All	1179	A	R	99	A	34	59	59	G	29	24	24	83	0.00464127	1	0	5
Unigene16914_All	1184	G	R	99	G	31	61	61	A	35	17	17	78	0.0445231	1	0	5
Unigene16914_All	1430	G	R	99	G	30	116	116	A	32	29	29	145	0.0843162	1	0	12
Unigene16914_All	1442	A	R	99	A	34	118	118	G	35	27	27	145	0.137972	1	0	9
Unigene16914_All	1451	T	K	99	T	33	93	93	G	33	19	19	113	0.307165	1	0	9
Unigene16914_All	1493	C	Y	38	C	35	92	92	T	38	9	9	101	0.0780258	1	0	42
Unigene16915_All	340	A	M	65	A	38	27	27	C	37	6	6	33	0.727382	1	0	27
Unigene16915_All	367	G	K	90	G	34	46	46	T	37	10	10	56	0.253087	1	0	23
Unigene16915_All	424	A	R	65	A	33	34	34	G	37	7	7	41	0.626895	1	0	18
Unigene16915_All	442	T	Y	99	T	33	39	39	C	36	13	13	52	0.544607	1	0	13
Unigene16915_All	455	T	K	46	G	37	17	17	T	32	16	16	46	0.51575	1	0	13
Unigene16915_All	475	C	Y	99	C	35	33	33	T	37	13	13	46	0.525666	1	0	20
Unigene16915_All	787	G	R	99	G	36	58	58	A	37	11	11	70	0.266677	1	0	5
Unigene16915_All	792	T	Y	99	T	35	61	61	C	35	14	14	75	0.489152	1	0	5
Unigene16915_All	802	A	R	99	A	33	55	55	G	36	13	13	68	0.0899188	1	0	10
Unigene16915_All	835	G	R	99	G	34	32	32	A	36	22	22	54	0.703435	1	0	18
Unigene16915_All	853	A	R	99	A	33	39	39	G	35	16	16	55	0.395149	1	0	18
Unigene16915_All	872	G	R	37	G	33	53	53	A	34	9	9	62	0.290876	1	0	19
Unigene16915_All	927	C	S	84	C	35	60	60	G	36	9	9	69	0.0660886	1	0	55
Unigene16915_All	998	A	W	99	A	32	15	15	T	32	13	13	32	0.705182	1	0	15
Unigene16915_All	1090	T	W	99	T	38	34	34	A	36	25	25	59	0.071936	1	0	76
Unigene16915_All	1174	A	R	99	A	34	29	29	G	34	15	15	44	0.39389	1	0	30
Unigene16915_All	1204	A	W	99	A	35	24	24	T	37	20	20	44	0.598349	1	0	30
Unigene16916_All	32	T	W	99	T	38	38	38	A	35	17	17	55	0.0010904	1	0	12
Unigene16916_All	44	C	M	99	C	38	39	39	A	38	17	17	56	0.721942	1	0	12
Unigene16916_All	120	A	W	83	A	29	41	41	T	31	9	9	50	0.159108	1	0	13
Unigene16916_All	133	T	W	99	T	31	45	45	A	27	19	19	64	0.00899573	1	0	8
Unigene16916_All	150	G	R	22	G	35	56	56	A	33	8	8	64	0.175204	1	0	8
Unigene16916_All	159	A	R	99	A	37	44	44	G	38	20	20	64	0.3805	1	0	9
Unigene16916_All	378	A	R	99	A	35	41	41	G	35	15	15	56	0.427402	1	0	219
Unigene16916_All	597	T	Y	99	T	37	47	47	C	36	13	13	60	0.0873735	1	0	114
Unigene16916_All	711	G	R	99	G	35	32	32	A	37	10	10	42	0.163984	1	0	114
Unigene16916_All	882	C	M	99	C	36	128	128	A	36	49	49	177	0.488884	1	0	27
Unigene16916_All	909	T	Y	99	T	36	88	88	C	36	50	50	138	0.4841	1	0	27
Unigene16916_All	993	A	R	99	A	38	94	94	G	36	30	30	124	0.0902788	1	0	39
Unigene16916_All	1032	A	R	99	A	36	69	69	G	37	16	16	85	0.459703	1	0	39
Unigene16916_All	1307	T	Y	99	T	34	42	42	C	36	16	16	58	0.508392	1	0	45
Unigene16916_All	1352	G	R	99	A	35	34	34	G	37	15	15	49	0.752139	1	0	43
Unigene16916_All	1395	T	Y	99	T	37	33	33	C	38	13	13	46	0.583378	1	0	43
Unigene16916_All	1457	T	Y	75	T	39	33	33	C	39	8	8	41	0.708485	1	0	31
Unigene16916_All	1488	C	M	90	C	38	38	38	A	39	8	8	46	0.649628	1	0	31
Unigene16916_All	1558	T	W	99	T	36	38	38	A	35	29	29	67	0.10514	1	0	70
Unigene16917_All	178	G	R	99	G	34	106	106	A	34	15	15	121	0.376529	1	0	27
Unigene16917_All	205	C	Y	94	C	35	104	104	T	36	12	12	116	0.304256	1	0	27
Unigene16917_All	252	T	Y	99	T	37	99	99	C	36	25	25	124	0.287563	1	0	47
Unigene16917_All	447	T	W	39	T	36	55	55	A	32	7	7	62	0.078872	1	0	48
Unigene16917_All	495	T	Y	87	T	35	41	41	C	35	9	9	50	0.691451	1	0	48
Unigene16919_All	439	G	K	59	G	35	68	68	T	37	7	7	76	0.085974	1	0	673
Unigene16919_All	1759	T	Y	99	T	35	112	112	C	37	53	53	166	0.165554	1	0	864
Unigene1691_All	82	A	W	99	T	39	139	139	A	37	57	57	196	0.000106552	1	0	46
Unigene1691_All	248	G	R	99	G	33	16	16	A	34	12	12	28	0.23901	1	0	166
Unigene16920_All	364	C	Y	99	T	35	76	76	C	37	14	14	90	0.0907878	1	0	24
Unigene16920_All	388	G	K	30	G	34	90	90	T	36	6	6	96	0.211218	1	0	24
Unigene16920_All	558	T	Y	99	T	35	36	36	C	35	32	32	69	0.326907	1	0	170
Unigene16920_All	744	C	Y	70	C	32	80	80	T	33	10	10	91	0.191321	1	0	186
Unigene16920_All	1017	T	Y	99	T	34	110	110	C	36	16	16	126	0.0954557	1	0	127
Unigene16920_All	1144	G	R	99	G	37	83	83	A	38	15	15	98	0.486225	1	0	127
Unigene16921_All	543	G	R	43	G	33	13	13	A	33	5	5	18	0.0585901	1	0	26
Unigene16923_All	691	C	Y	49	C	38	11	11	T	37	5	5	16	0.685668	1	0	72
Unigene16924_All	440	C	S	99	C	36	18	18	G	35	16	16	34	0.733046	1	0	20
Unigene16924_All	460	A	R	99	A	37	21	21	G	37	15	15	36	0.647471	1	0	20
Unigene16925_All	197	G	R	63	G	37	5	5	A	35	5	5	10	0.5	1	0	40
Unigene16926_All	1176	A	W	32	A	38	43	43	T	35	7	7	50	0.0575279	1	0	294
Unigene16927_All	142	G	K	99	G	37	57	57	T	38	24	24	81	0.395989	1	0	59
Unigene16927_All	212	G	R	42	G	38	20	20	A	37	5	5	25	0.601901	1	0	70
Unigene16927_All	419	G	K	99	G	40	10	10	T	38	8	8	18	0.348233	1	0	168
Unigene16928_All	178	A	R	99	A	37	29	29	G	37	13	13	42	0.676715	1	0	219
Unigene16928_All	467	C	Y	56	C	35	8	8	T	40	5	5	13	0.542735	1	0	34
Unigene16929_All	139	C	Y	44	C	33	22	22	T	31	6	6	28	0.321314	1	0	24
Unigene16929_All	163	G	K	99	G	33	22	22	T	36	11	11	33	0.633609	1	0	24
Unigene16929_All	217	A	M	99	A	37	34	34	C	36	14	14	48	0.665477	1	0	54
Unigene16929_All	361	T	Y	75	T	35	54	54	C	31	11	11	65	0.0708325	1	0	144
Unigene1692_All	48	G	R	99	A	38	8	8	G	34	7	7	15	0.599223	1	0	153
Unigene1692_All	201	T	Y	50	T	37	11	11	C	35	5	5	17	0.110577	1	0	153
Unigene1692_All	423	C	Y	27	C	37	20	20	T	38	5	5	25	0.310503	1	0	9
Unigene16930_All	122	G	R	99	G	33	28	28	A	31	15	15	43	0.454896	1	0	46
Unigene16930_All	168	A	W	99	A	35	37	37	T	36	11	11	48	0.616816	1	0	46
Unigene16931_All	419	T	W	99	T	38	14	14	A	37	12	12	26	0.714904	1	0	239
Unigene16932_All	226	G	S	94	G	31	25	25	C	34	7	7	32	0.19744	1	0	226
Unigene16932_All	452	C	Y	99	C	35	37	37	T	34	20	20	58	0.644617	1	0	35
Unigene16932_All	487	T	Y	78	T	36	41	41	C	36	9	9	50	0.440825	1	0	35
Unigene16932_All	1078	A	M	99	A	37	48	48	C	35	31	31	79	0.253775	1	0	196
Unigene16932_All	1274	A	R	99	A	38	30	30	G	36	17	17	47	0.559738	1	0	196
Unigene16933_All	321	G	R	99	G	36	32	32	A	35	14	14	46	0.584444	1	0	130
Unigene16933_All	451	A	R	99	A	37	22	22	G	37	10	10	32	0.42865	1	0	29
Unigene16933_All	480	C	M	99	C	37	18	18	A	37	13	13	31	0.669665	1	0	29
Unigene16933_All	716	G	R	43	G	35	11	11	A	31	5	5	16	0.594322	1	0	57
Unigene16934_All	395	A	M	25	A	36	21	21	C	33	7	7	28	0.00506148	1	0	64
Unigene16934_All	459	T	Y	36	T	35	13	13	C	39	6	6	19	0.0231092	1	0	64
Unigene16934_All	762	T	Y	80	T	33	20	20	C	37	7	7	27	0.571982	1	0	291
Unigene16934_All	1053	G	R	99	G	38	15	15	A	34	15	15	30	0.218145	1	0	105
Unigene16936_All	677	C	Y	22	C	39	14	14	T	33	5	5	20	0.00515996	1	0	96
Unigene16936_All	866	A	R	99	A	36	17	17	G	36	8	8	25	0.688456	1	0	18
Unigene16937_All	122	C	Y	35	C	31	17	17	T	32	5	5	22	0.41004	1	0	18
Unigene16937_All	140	T	Y	61	T	32	17	17	C	33	6	6	23	0.716212	1	0	18
Unigene16937_All	182	G	K	99	G	35	16	16	T	24	10	10	26	0.50495	1	0	42
Unigene16938_All	454	T	W	99	T	37	26	26	A	36	12	12	38	0.532262	1	0	12
Unigene16938_All	466	G	K	99	G	36	32	32	T	37	11	11	43	0.157258	1	0	12
Unigene16939_All	574	G	R	57	G	36	9	9	A	38	5	5	14	0.62962	1	0	63
Unigene1693_All	285	A	R	99	A	39	18	18	G	39	12	12	30	0.586593	1	0	580
Unigene16940_All	591	A	R	99	A	35	28	28	G	37	11	11	39	0.150307	1	0	112
Unigene16940_All	703	T	Y	99	T	34	20	20	C	36	11	11	31	0.334773	1	0	112
Unigene16942_All	170	A	M	69	A	34	15	15	C	39	5	5	20	0.535442	1	0	18
Unigene16944_All	56	A	M	99	A	39	78	78	C	35	30	30	108	4.24e-05	1	0	120
Unigene16944_All	415	C	Y	99	C	38	57	57	T	39	14	14	71	0.0883083	1	0	66
Unigene16944_All	481	A	R	47	A	34	57	57	G	33	9	9	66	0.119566	1	0	66
Unigene16944_All	676	C	Y	32	T	37	32	32	C	38	5	5	37	0.55316	1	0	75
Unigene16945_All	220	A	R	99	A	31	12	12	G	36	10	10	22	0.0536012	1	0	55
Unigene16945_All	275	G	R	99	G	37	26	26	A	37	12	12	38	0.103275	1	0	55
Unigene16945_All	375	T	Y	66	T	38	52	52	C	37	9	9	61	0.27065	1	0	48
Unigene16945_All	423	G	R	99	G	36	54	54	A	36	12	12	66	0.430711	1	0	48
Unigene16945_All	840	C	M	60	C	38	22	22	A	33	6	6	28	0.070481	1	0	18
Unigene16945_All	858	C	M	59	C	38	19	19	A	37	5	5	24	0.72265	1	0	18
Unigene16945_All	1293	T	Y	30	T	37	40	40	C	39	6	6	46	0.655412	1	0	308
Unigene16946_All	604	G	R	99	G	26	17	17	A	27	10	10	28	0.618375	1	0	72
Unigene16946_All	676	A	W	99	A	37	37	37	T	39	13	13	50	0.113442	1	0	72
Unigene16947_All	144	G	R	99	G	36	16	16	A	36	9	9	25	0.466849	1	0	122
Unigene16947_All	266	G	R	99	G	34	20	20	A	33	15	15	35	0.35255	1	0	42
Unigene16947_All	308	G	R	54	G	36	29	29	A	39	8	8	37	0.228488	1	0	42
Unigene16947_All	782	A	R	99	A	37	78	78	G	34	22	22	100	0.0842389	1	0	228
Unigene16947_All	1010	T	Y	99	T	34	77	77	C	36	48	48	125	0.0273441	1	0	117
Unigene16947_All	1127	C	Y	99	C	36	42	42	T	35	40	40	82	0.113913	1	0	48
Unigene16947_All	1175	T	Y	99	T	34	29	29	C	33	14	14	43	0.216936	1	0	39
Unigene16947_All	1214	G	R	99	G	35	37	37	A	36	32	32	69	0.296166	1	0	39
Unigene16950_All	230	C	Y	99	C	36	8	8	T	37	7	7	15	0.738772	1	0	10
Unigene16951_All	488	G	R	47	G	37	26	26	A	40	6	6	32	0.504047	1	0	787
Unigene16953_All	100	A	R	55	A	32	13	13	G	36	6	6	19	0.161433	1	0	150
Unigene16953_All	943	A	R	99	G	33	10	10	A	37	7	7	17	0.508253	1	0	81
Unigene16953_All	1061	A	M	99	A	32	30	30	C	34	10	10	40	0.626979	1	0	49
Unigene16954_All	75	A	R	81	G	39	11	11	A	38	5	5	16	0.627404	1	0	35
Unigene16954_All	515	A	M	99	A	34	34	34	C	38	31	31	65	0.00919772	1	0	33
Unigene16954_All	548	A	R	99	G	36	23	23	A	36	23	23	46	0.142339	1	0	33
Unigene16955_All	54	A	R	99	A	37	9	9	G	36	9	9	18	0.218141	1	0	23
Unigene16955_All	151	T	Y	99	C	37	22	22	T	37	21	21	43	0.672866	1	0	97
Unigene16955_All	266	G	K	99	G	36	45	45	T	36	10	10	55	0.504284	1	0	80
Unigene16955_All	346	C	S	73	C	36	61	61	G	35	8	8	69	0.204777	1	0	80
Unigene16955_All	535	G	S	33	G	33	73	73	C	30	8	8	81	0.363824	1	0	14
Unigene16955_All	598	G	R	99	G	35	189	189	A	35	15	15	204	0.351344	1	0	30
Unigene16955_All	628	A	R	99	A	31	124	124	G	30	56	56	180	0.227769	1	0	30
Unigene16956_All	276	A	R	86	G	35	6	6	A	36	5	5	11	0.331169	1	0	76
Unigene16956_All	770	A	R	45	A	37	30	30	G	36	7	7	37	0.638971	1	0	189
Unigene16956_All	959	C	Y	56	C	37	17	17	T	35	6	6	23	0.529283	1	0	46
Unigene16956_All	1005	G	R	99	A	35	17	17	G	38	9	9	26	0.57808	1	0	46
Unigene16956_All	1697	G	R	50	G	35	12	12	A	35	5	5	17	0.439399	1	0	470
Unigene16957_All	171	A	R	99	G	35	17	17	A	34	14	14	31	0.63593	1	0	236
Unigene16957_All	510	C	Y	49	C	37	19	19	T	35	6	6	25	0.61865	1	0	9
Unigene16958_All	176	G	R	93	G	39	13	13	A	33	8	8	21	0.526048	1	0	331
Unigene16959_All	129	C	M	99	C	35	41	41	A	36	25	25	66	0.275973	1	0	501
Unigene16959_All	888	C	M	99	C	36	24	24	A	33	12	12	36	0.281111	1	0	44
Unigene16959_All	1066	G	S	99	G	34	12	12	C	34	11	11	23	0.743983	1	0	121
Unigene16959_All	1250	T	K	99	G	37	22	22	T	36	20	20	42	0.455371	1	0	59
Unigene16959_All	1380	G	R	99	A	34	26	26	G	33	24	24	50	0.375401	1	0	130
Unigene16959_All	1530	C	Y	99	C	35	22	22	T	37	11	11	33	0.432855	1	0	21
Unigene16959_All	1551	G	R	42	G	38	24	24	A	38	7	7	31	0.435827	1	0	21
Unigene16960_All	306	C	Y	99	T	33	35	35	C	29	36	36	72	0.0697186	1	0	560
Unigene16962_All	338	G	R	81	G	37	15	15	A	34	8	8	23	0.508429	1	0	267
Unigene16962_All	605	C	T	93	T	36	45	45	C	0	0	4	49	1	1.10204	0	39
Unigene16962_All	644	C	M	99	C	37	23	23	A	38	21	25	48	0.656259	1.10417	0	39
Unigene16962_All	734	G	K	99	G	37	9	9	T	37	6	6	15	0.568032	1	0	90
Unigene16963_All	88	A	W	99	A	37	24	24	T	37	10	10	34	0.376012	1	0	46
Unigene16966_All	308	C	Y	99	C	37	19	19	T	38	10	10	29	0.628114	1	0	200
Unigene16966_All	508	T	Y	33	T	37	23	23	C	36	5	5	28	0.0701303	1	0	200
Unigene16967_All	490	T	Y	99	T	34	213	213	C	34	42	42	642	0.0832201	1	0	118
Unigene16967_All	949	C	Y	99	C	35	117	117	T	37	43	43	160	0.0272659	1	0	300
Unigene16968_All	74	C	Y	99	C	38	9	9	T	39	8	8	17	0.444179	1	0	9
Unigene16968_All	140	A	W	99	T	38	11	11	A	38	10	10	21	0.729423	1	0	6
Unigene16968_All	194	C	S	99	G	34	16	16	C	36	14	14	31	0.304198	1	0	48
Unigene16968_All	275	T	Y	87	T	38	18	18	C	38	7	7	25	0.418084	1	0	10
Unigene16968_All	285	T	Y	99	T	37	13	13	C	35	8	8	21	0.526048	1	0	10
Unigene16968_All	307	C	Y	54	C	35	14	14	T	34	6	6	20	0.559778	1	0	12
Unigene16968_All	558	G	R	99	A	37	11	11	G	37	9	9	20	0.411878	1	0	5
Unigene16968_All	563	T	Y	99	T	36	11	11	C	36	10	10	21	0.125602	1	0	5
Unigene16968_All	618	G	R	99	G	36	12	12	A	39	8	8	20	0.595936	1	0	55
Unigene1696_All	254	C	M	72	C	40	5	5	A	37	5	5	10	0.047619	1	0	15
Unigene16970_All	529	G	R	60	G	35	39	39	A	35	8	8	47	0.472343	1	0	57
Unigene16970_All	586	T	W	99	T	36	24	24	A	30	11	11	35	0.0198452	1	0	48
Unigene16970_All	634	G	R	99	G	37	65	65	A	32	14	14	79	0.0501534	1	0	48
Unigene16970_All	817	A	W	74	A	28	50	50	T	33	8	8	59	0.125387	1	0	117
Unigene16970_All	934	G	R	71	G	31	12	12	A	29	7	7	21	0.149559	1	0	117
Unigene16971_All	229	A	R	23	A	36	36	36	G	32	8	8	44	0.250435	1	0	769
Unigene16971_All	1424	A	W	99	A	35	95	95	T	34	11	11	106	0.218589	1	0	146
Unigene16971_All	1570	A	W	99	T	34	45	45	A	35	42	42	88	0.102824	1	0	57
Unigene16971_All	1627	A	R	99	A	36	41	41	G	37	14	14	55	0.559428	1	0	24
Unigene16971_All	1651	A	R	32	A	35	27	27	G	36	6	6	33	0.366474	1	0	24
Unigene16972_All	294	A	R	99	A	36	22	22	G	33	14	14	36	0.163404	1	0	185
Unigene16972_All	662	C	S	99	C	35	38	38	G	32	12	12	50	0.534562	1	0	32
Unigene16972_All	694	A	W	99	A	36	31	31	T	34	28	28	59	0.431235	1	0	32
Unigene16972_All	792	A	R	96	A	37	49	49	G	38	11	11	60	0.633395	1	0	98
Unigene16972_All	1066	T	Y	99	T	35	28	28	C	34	23	23	51	0.488776	1	0	6
Unigene16972_All	1072	G	R	99	G	33	45	45	A	32	12	12	58	0.702296	1	0	6
Unigene16972_All	1153	T	Y	99	C	33	29	29	T	24	37	37	66	6.91e-05	1	0	70
Unigene16972_All	1223	A	W	99	T	36	37	37	A	36	30	30	67	0.439867	1	0	70
Unigene16977_All	456	T	Y	46	T	32	9	9	C	29	5	5	14	0.303197	1	0	118
Unigene16977_All	1759	C	M	69	C	34	27	27	A	37	6	6	33	0.619824	1	0	132
Unigene16979_All	637	G	S	99	G	37	12	12	C	36	12	12	24	0.637792	1	0	6
Unigene16979_All	643	C	M	99	A	37	12	12	C	37	12	12	24	0.421418	1	0	6
Unigene16979_All	686	A	R	99	G	35	9	9	A	28	10	10	19	0.533325	1	0	43
Unigene1697_All	160	A	R	99	A	37	39	60	G	36	20	27	87	0.244674	1.32184	0	522
Unigene16980_All	542	T	K	75	T	36	11	11	G	34	5	5	16	0.610234	1	0	193
Unigene16980_All	853	A	W	56	A	37	20	20	T	36	5	5	25	0.567947	1	0	11
Unigene16981_All	244	G	R	99	G	30	61	61	A	34	27	27	88	0.00390605	1	0	42
Unigene16981_All	286	C	M	99	C	36	53	53	A	36	33	33	86	0.356236	1	0	24
Unigene16981_All	310	A	R	99	G	36	35	35	A	29	31	31	66	2.52e-05	1	0	24
Unigene16981_All	337	G	S	42	G	34	62	62	C	36	7	7	69	0.496036	1	0	27
Unigene16981_All	415	C	Y	99	C	33	63	63	T	36	16	16	79	0.186596	1	0	78
Unigene16981_All	535	G	K	99	G	34	54	54	T	36	18	18	72	0.0255471	1	0	15
Unigene16981_All	757	A	R	99	A	36	23	23	G	38	13	13	36	0.32454	1	0	33
Unigene16981_All	799	T	W	99	T	34	24	24	A	31	16	16	40	0.563797	1	0	9
Unigene16981_All	898	A	R	31	A	35	31	31	G	38	6	6	37	0.0524109	1	0	15
Unigene16981_All	913	A	W	36	A	36	27	27	T	36	5	5	32	0.720036	1	0	15
Unigene16981_All	1045	G	R	99	G	36	32	32	A	36	14	14	46	0.193991	1	0	114
Unigene16985_All	278	G	K	99	G	37	47	47	T	38	18	18	65	0.207929	1	0	31
Unigene16985_All	628	A	W	99	A	38	50	50	T	38	17	17	67	0.434196	1	0	126
Unigene16985_All	892	G	R	96	G	36	14	14	A	36	7	7	21	0.456562	1	0	40
Unigene16985_All	932	G	S	99	G	35	9	9	C	35	7	7	16	0.709266	1	0	40
Unigene16987_All	161	G	K	99	T	39	6	6	G	38	5	5	11	0.665584	1	0	90
Unigene16988_All	164	G	R	99	G	38	31	31	A	37	12	12	43	0.110622	1	0	8
Unigene16988_All	172	G	R	99	G	38	33	33	A	33	12	12	45	0.006402	1	0	8
Unigene16988_All	184	A	W	99	A	38	33	33	T	37	12	12	45	0.572765	1	0	12
Unigene16988_All	246	A	W	99	A	34	37	37	T	32	25	25	62	0.544678	1	0	16
Unigene16989_All	321	A	W	99	T	37	70	94	A	35	31	64	158	0.100713	1.51899	0	44
Unigene16989_All	365	G	R	99	G	37	70	84	A	38	21	27	111	0.0952095	1.18018	0	44
Unigene16993_All	160	A	M	82	A	37	26	26	C	37	8	8	34	0.281631	1	0	5
Unigene16993_All	263	T	Y	99	T	35	19	19	C	37	9	9	28	0.314526	1	0	19
Unigene16993_All	282	G	R	90	G	37	21	21	A	39	8	8	29	0.645494	1	0	8
Unigene16993_All	290	C	Y	76	C	36	23	23	T	37	8	8	31	0.403905	1	0	8
Unigene16993_All	439	C	M	91	C	39	9	9	A	36	6	6	15	0.521978	1	0	149
Unigene16994_All	86	G	R	99	G	32	34	34	A	36	20	20	55	0.0632128	1	0	9
Unigene16994_All	95	G	R	84	G	37	42	42	A	36	11	11	53	0.166992	1	0	9
Unigene16994_All	143	C	Y	40	C	36	92	92	T	37	9	9	102	0.25222	1	0	48
Unigene16994_All	214	C	Y	99	C	35	103	103	T	36	29	29	132	0.267284	1	0	45
Unigene16994_All	259	A	M	99	A	35	158	158	C	37	14	14	172	0.206001	1	0	45
Unigene16994_All	388	G	R	99	G	36	111	111	A	36	28	28	139	0.300652	1	0	24
Unigene16994_All	412	A	W	99	A	33	116	116	T	33	34	34	151	0.196863	1	0	15
Unigene16994_All	427	C	Y	99	C	36	94	94	T	36	28	28	122	0.281501	1	0	15
Unigene16994_All	550	C	M	99	C	36	67	67	A	37	18	18	85	0.213023	1	0	54
Unigene16994_All	604	T	Y	99	C	35	31	31	T	35	25	25	60	0.403139	1	0	42
Unigene16994_All	646	T	K	45	T	36	63	63	G	36	9	9	72	0.442462	1	0	42
Unigene16994_All	1030	T	Y	99	C	37	33	33	T	36	27	27	60	0.75	1	0	48
Unigene16996_All	952	C	S	39	C	34	51	51	G	33	6	6	57	0.621046	1	0	487
Unigene16997_All	32	T	Y	99	T	35	26	26	C	38	12	12	38	0.524924	1	0	111
Unigene16997_All	143	C	Y	99	C	32	33	33	T	28	13	13	46	0.531348	1	0	86
Unigene16997_All	844	A	R	87	A	37	9	9	G	35	8	8	17	0.0569724	1	0	7
Unigene16997_All	933	G	K	99	G	33	17	17	T	33	12	12	36	0.473954	1	0	18
Unigene16997_All	960	A	R	99	A	35	25	25	G	33	14	14	39	0.144609	1	0	27
Unigene16997_All	1023	A	W	99	A	31	18	18	T	34	13	13	31	0.622304	1	0	63
Unigene16997_All	1094	G	R	99	G	35	20	20	A	35	17	17	37	0.676647	1	0	71
Unigene16997_All	1206	C	S	75	C	35	12	12	G	34	5	5	17	0.643584	1	0	85
Unigene16997_All	1291	C	M	99	C	35	21	21	A	35	19	19	40	0.697209	1	0	85
Unigene169_All	495	C	Y	77	C	35	51	51	T	33	10	10	61	0.577871	1	0	204
Unigene169_All	1269	C	Y	36	C	37	11	11	T	36	5	5	16	0.5	1	0	9
Unigene16_All	754	C	Y	99	C	38	70	70	T	38	30	30	100	0.300569	1	0	16
Unigene16_All	858	C	Y	99	C	32	116	116	T	33	40	40	156	0.0278321	1	0	45
Unigene16_All	903	G	R	86	G	37	134	134	A	37	15	15	149	0.279757	1	0	42
Unigene16_All	945	A	G	70	G	38	32	32	A	0	0	0	32	1	1	0	19
Unigene16_All	1280	T	Y	47	T	34	108	204	C	31	12	20	224	0.00518736	1.46429	0	36
Unigene16_All	1316	A	M	99	C	38	90	156	A	37	21	83	239	0.190201	1.53556	0	36
Unigene17000_All	185	T	Y	42	T	35	46	46	C	37	7	7	55	0.682127	1	0	422
Unigene17000_All	830	A	W	99	T	35	6	6	A	38	5	5	11	0.582251	1	0	11
Unigene17000_All	1249	A	M	99	A	38	15	15	C	34	13	13	28	0.147231	1	0	101
Unigene17000_All	1377	C	Y	48	C	35	17	17	T	38	6	6	23	0.579814	1	0	128
Unigene17002_All	540	C	Y	33	C	38	49	49	T	36	6	6	56	0.0580103	1	0	61
Unigene17003_All	252	T	Y	79	T	37	31	31	C	39	10	10	41	0.0559623	1	0	90
Unigene17003_All	342	G	R	99	G	32	16	16	A	29	13	13	29	0.719983	1	0	90
Unigene17003_All	879	C	M	99	C	32	21	21	A	33	10	10	31	0.442226	1	0	9
Unigene17003_All	888	C	Y	99	C	37	19	19	T	36	10	10	29	0.286276	1	0	9
Unigene17003_All	912	A	R	99	A	35	20	20	G	30	11	11	31	0.475716	1	0	24
Unigene17003_All	1152	T	Y	99	T	38	40	40	C	38	21	21	61	0.594392	1	0	138
Unigene17003_All	1473	C	Y	99	C	36	20	20	T	35	14	14	34	0.712366	1	0	268
Unigene17003_All	1741	C	Y	99	C	35	38	38	T	36	30	30	68	0.0733509	1	0	268
Unigene17003_All	2525	T	Y	54	T	35	147	147	C	33	9	9	156	0.0765085	1	0	77
Unigene17003_All	2602	A	R	99	A	37	115	115	G	38	49	49	165	0.138575	1	0	77
Unigene17003_All	2784	C	Y	99	C	32	83	83	T	35	31	31	114	0.094783	1	0	182
Unigene17003_All	3030	C	Y	99	C	36	187	187	T	32	68	68	287	0.00271698	1	0	30
Unigene17003_All	3060	G	R	99	G	34	183	183	A	36	72	72	282	0.0741247	1	0	30
Unigene17003_All	3192	C	Y	99	C	32	115	115	T	32	57	57	173	0.282933	1	0	72
Unigene17003_All	3264	C	Y	99	C	37	136	136	T	35	80	80	216	0.0298847	1	0	58
Unigene17003_All	3322	A	M	99	A	33	70	70	C	33	69	69	140	0.253509	1	0	47
Unigene17003_All	3369	G	R	99	G	37	63	63	A	37	61	61	124	0.460188	1	0	47
Unigene17005_All	360	G	R	99	G	37	119	119	A	37	57	57	177	0.267743	1	0	153
Unigene17005_All	542	T	Y	99	T	35	102	102	C	37	12	12	114	0.0723044	1	0	182
Unigene17005_All	1143	A	R	99	A	35	51	51	G	31	15	15	66	0.0337387	1	0	29
Unigene17005_All	1172	T	Y	99	T	33	43	43	C	35	12	12	55	0.747995	1	0	29
Unigene17005_All	1548	G	R	67	G	36	42	42	A	34	10	10	52	0.628489	1	0	308
Unigene17005_All	1856	T	Y	56	T	27	37	37	C	27	9	9	47	0.311959	1	0	131
Unigene17005_All	2262	C	Y	49	C	32	54	54	T	34	9	9	63	0.37498	1	0	9
Unigene17005_All	2271	T	W	99	T	34	53	53	A	38	10	10	64	0.0444543	1	0	9
Unigene17005_All	2322	C	Y	55	C	32	53	53	T	36	10	10	63	0.0172679	1	0	51
Unigene17005_All	2418	C	Y	99	C	38	52	52	T	38	13	13	65	0.261216	1	0	53
Unigene17005_All	2471	T	Y	85	T	32	25	25	C	29	9	9	34	0.543752	1	0	53
Unigene17005_All	2795	C	M	99	C	35	33	33	A	34	11	11	44	0.436355	1	0	249
Unigene17007_All	949	T	Y	99	T	37	48	48	C	35	47	47	95	0.105553	1	0	90
Unigene17007_All	1039	T	Y	53	T	35	39	39	C	36	8	8	47	0.708769	1	0	33
Unigene17007_All	1072	A	R	99	A	36	29	29	G	35	17	17	46	0.564543	1	0	33
Unigene17007_All	1279	G	R	89	G	33	41	41	A	32	11	11	52	0.329239	1	0	30
Unigene17007_All	1309	C	M	99	C	36	29	29	A	35	27	27	56	0.628711	1	0	30
Unigene17007_All	1444	T	W	99	A	37	21	21	T	37	20	20	41	0.363788	1	0	135
Unigene17008_All	2533	G	R	99	G	36	127	127	A	38	52	52	179	0.00261277	1	0	123
Unigene17008_All	2656	A	R	74	A	36	73	73	G	35	13	13	86	0.19768	1	0	123
Unigene17009_All	565	T	Y	75	T	33	21	21	C	34	8	8	29	0.471438	1	0	772
Unigene1700_All	158	C	M	48	C	37	20	20	A	39	5	5	25	0.0647092	1	0	48
Unigene1700_All	238	C	M	99	C	36	18	18	A	38	12	12	30	0.54999	1	0	26
Unigene17010_All	173	C	Y	99	C	31	58	58	T	33	18	18	76	0.389351	1	0	20
Unigene17010_All	232	C	M	99	C	35	124	124	A	37	33	33	157	0.00646264	1	0	18
Unigene17010_All	354	C	Y	99	C	32	108	108	T	34	22	22	130	0.106578	1	0	122
Unigene17010_All	586	T	W	99	T	36	73	73	A	34	14	14	87	0.0711892	1	0	232
Unigene17010_All	853	A	W	99	A	37	36	36	T	35	22	22	58	0.396573	1	0	81
Unigene17010_All	934	A	R	62	A	37	25	25	G	35	7	7	32	0.618604	1	0	12
Unigene17010_All	946	G	R	55	G	37	26	26	A	36	7	7	33	0.678575	1	0	12
Unigene17010_All	1029	T	Y	28	T	35	29	29	C	34	6	6	35	0.663487	1	0	83
Unigene17010_All	1234	T	W	34	T	34	86	86	A	33	9	9	107	0.204392	1	0	117
Unigene17010_All	1498	T	Y	99	T	36	90	90	C	37	21	21	112	0.152036	1	0	21
Unigene17011_All	118	C	S	99	C	40	15	15	G	40	7	7	22	0.133297	1	0	110
Unigene17011_All	228	T	W	86	T	32	20	20	A	30	7	7	27	0.57845	1	0	6
Unigene17011_All	290	A	R	99	A	37	185	185	G	36	70	70	933	0.0605015	1	0	46
Unigene17013_All	145	C	S	92	C	35	17	17	G	37	7	7	24	0.246937	1	0	124
Unigene17013_All	516	G	R	39	G	35	14	14	A	30	6	6	20	0.0310888	1	0	102
Unigene17016_All	269	T	C	20	C	37	8	8	T	0	0	0	8	1	1	0	11
Unigene17017_All	29	T	Y	32	T	37	104	104	C	38	8	8	112	0.426061	1	0	27
Unigene17018_All	63	G	R	56	G	36	185	185	A	38	12	12	198	0.178211	1	0	29
Unigene17018_All	92	T	K	42	T	38	206	206	G	39	14	14	220	0.267468	1	0	29
Unigene17018_All	148	C	Y	21	C	32	175	175	T	35	8	8	183	0.285529	1	0	56
Unigene17018_All	329	G	R	99	G	37	201	201	A	37	24	24	226	0.30065	1	0	6
Unigene17018_All	335	C	Y	99	C	36	199	199	T	36	24	24	223	0.365061	1	0	6
Unigene17018_All	765	T	Y	99	T	35	23	23	C	37	15	15	38	0.550435	1	0	146
Unigene17018_All	959	A	R	99	A	35	90	90	G	34	33	33	124	0.335322	1	0	48
Unigene17018_All	1329	A	W	99	A	33	90	90	T	34	13	13	103	0.304524	1	0	75
Unigene17019_All	206	G	S	99	G	38	23	23	C	39	11	11	34	0.442387	1	0	34
Unigene1701_All	300	T	W	99	T	38	67	67	A	37	11	11	78	0.15574	1	0	29
Unigene1701_All	329	A	W	99	A	38	65	65	T	39	12	12	77	0.191948	1	0	29
Unigene17022_All	224	G	R	65	G	35	14	14	A	37	6	6	20	0.679515	1	0	101
Unigene17022_All	325	A	R	74	A	35	8	8	G	34	6	6	15	0.331002	1	0	101
Unigene17024_All	1117	C	S	99	C	37	223	223	G	37	24	24	247	0.109953	1	0	165
Unigene17024_All	1282	G	K	92	G	35	244	244	T	35	11	11	421	0.117231	1	0	43
Unigene17024_All	1325	C	Y	99	T	35	182	182	C	36	73	73	404	0.168098	1	0	13
Unigene17024_All	1338	A	W	99	A	36	187	187	T	35	67	67	355	0.382677	1	0	13
Unigene17025_All	202	T	Y	99	T	37	26	26	C	35	12	12	38	0.536493	1	0	34
Unigene17025_All	236	A	R	35	A	33	26	26	G	38	5	5	32	0.532208	1	0	34
Unigene17026_All	212	G	R	55	G	37	144	144	A	33	12	12	156	0.128408	1	0	146
Unigene17026_All	358	C	Y	73	C	37	81	81	T	39	17	17	98	0.0162118	1	0	49
Unigene17026_All	407	C	Y	99	T	34	55	55	C	34	48	48	103	0.40466	1	0	49
Unigene17026_All	491	A	W	99	A	39	81	81	T	37	23	23	104	0.0279969	1	0	84
Unigene17027_All	588	C	Y	99	C	36	62	62	T	35	14	14	76	0.0608556	1	0	441
Unigene17027_All	1029	T	Y	99	T	35	78	78	C	37	16	16	94	0.027015	1	0	441
Unigene17028_All	56	G	R	54	G	37	5	5	A	33	5	5	10	0.710317	1	0	85
Unigene17028_All	428	C	Y	73	C	33	7	7	T	36	6	6	13	0.527389	1	0	72
Unigene17029_All	127	T	Y	99	T	36	107	107	C	32	14	14	121	0.0281764	1	0	15
Unigene17029_All	166	G	R	99	G	33	114	114	A	34	15	15	129	0.352574	1	0	39
Unigene17029_All	517	G	K	99	G	37	55	55	T	32	14	14	69	0.0295465	1	0	58
Unigene17029_All	575	C	Y	99	C	36	51	51	T	35	17	17	68	0.338043	1	0	38
Unigene17029_All	613	C	S	99	C	35	54	54	G	38	10	10	65	0.0309165	1	0	38
Unigene17029_All	742	G	R	20	G	35	43	43	A	35	7	7	50	0.0947881	1	0	63
Unigene17029_All	805	C	Y	99	C	33	44	44	T	35	21	21	66	0.0291308	1	0	63
Unigene17029_All	952	C	Y	99	C	36	69	69	T	37	16	16	85	0.324441	1	0	105
Unigene17029_All	1057	T	W	99	T	37	48	48	A	37	10	10	58	0.455631	1	0	105
Unigene17029_All	1369	G	R	99	G	37	32	32	A	37	11	11	43	0.365828	1	0	66
Unigene17029_All	1435	G	R	69	G	36	31	31	A	36	8	8	39	0.479611	1	0	66
Unigene17029_All	1572	T	W	99	T	34	48	48	A	37	16	16	64	0.0113294	1	0	137
Unigene17033_All	59	T	W	99	T	39	28	28	A	38	26	26	54	0.197261	1	0	67
Unigene17033_All	126	A	W	99	A	38	35	35	T	34	21	21	60	0.0112151	1	0	14
Unigene17033_All	140	T	W	99	T	39	32	32	A	38	28	28	60	0.295595	1	0	13
Unigene17033_All	367	G	R	99	G	36	25	25	A	36	19	19	44	0.43482	1	0	29
Unigene17033_All	396	A	W	99	A	37	21	21	T	36	16	16	38	0.543654	1	0	23
Unigene17033_All	419	T	W	99	T	37	25	25	A	38	15	15	40	0.526429	1	0	23
Unigene17035_All	1421	A	R	50	A	36	194	194	G	38	10	10	204	0.199563	1	0	17
Unigene17035_All	1896	C	S	99	C	37	107	107	G	38	11	11	119	0.0868123	1	0	211
Unigene17039_All	280	A	R	99	A	34	34	34	G	38	16	16	50	0.0375993	1	0	34
Unigene17039_All	323	C	M	99	A	29	27	27	C	29	20	20	47	0.250785	1	0	5
Unigene17039_All	359	A	M	99	A	35	29	29	C	31	12	12	41	0.596818	1	0	36
Unigene17039_All	424	G	K	99	T	38	29	29	G	32	28	28	57	0.500004	1	0	15
Unigene17039_All	439	C	Y	44	C	37	39	39	T	28	9	9	49	0.204958	1	0	5
Unigene17039_All	444	G	K	99	T	36	43	43	G	31	14	14	60	0.517594	1	0	5
Unigene17039_All	665	A	R	99	A	36	89	89	G	35	21	21	110	0.177727	1	0	72
Unigene17039_All	756	A	M	71	A	37	148	148	C	36	12	12	160	0.183074	1	0	91
Unigene17039_All	854	A	R	54	A	35	100	100	G	37	10	10	110	0.12745	1	0	14
Unigene17039_All	868	T	Y	46	T	34	96	96	C	37	10	10	106	0.0116106	1	0	5
Unigene17039_All	873	A	R	34	A	32	92	92	G	38	10	10	102	0.000299356	1	0	5
Unigene17039_All	878	C	Y	54	C	34	93	93	T	39	10	10	103	0.0259661	1	0	5
Unigene17039_All	917	G	K	31	G	34	96	96	T	33	7	7	103	0.27991	1	0	37
Unigene17039_All	954	A	R	99	A	36	38	38	G	36	14	14	53	0.599058	1	0	37
Unigene17039_All	1079	G	R	96	G	36	27	27	A	38	10	10	37	0.114404	1	0	38
Unigene17039_All	1117	T	W	99	T	33	21	21	A	36	10	10	31	0.184915	1	0	38
Unigene17039_All	1193	G	R	30	G	36	34	34	A	39	8	8	42	0.520194	1	0	76
Unigene17039_All	1421	A	R	99	A	32	33	33	G	32	13	13	46	0.5	1	0	12
Unigene17039_All	1711	C	Y	80	C	37	33	33	T	35	10	10	43	0.0315187	1	0	16
Unigene17039_All	1727	A	R	85	A	38	32	32	G	36	10	10	42	0.0279549	1	0	16
Unigene17040_All	577	A	R	99	A	37	55	55	G	37	15	15	70	0.151377	1	0	862
Unigene17040_All	1439	C	Y	22	C	36	115	115	T	35	9	9	124	0.275216	1	0	443
Unigene17041_All	101	T	Y	99	T	30	47	47	C	26	37	37	84	0.0747046	1	0	86
Unigene17042_All	399	T	W	99	T	36	18	18	A	36	9	9	27	0.333932	1	0	59
Unigene17042_All	458	A	R	56	A	36	31	31	G	33	9	9	40	0.0690984	1	0	59
Unigene17043_All	138	C	Y	99	T	35	12	12	C	35	9	9	21	0.715517	1	0	15
Unigene17043_All	153	C	Y	99	T	36	10	10	C	33	10	10	20	0.554391	1	0	15
Unigene17043_All	300	A	R	25	A	35	19	19	G	28	6	6	25	0.00281197	1	0	19
Unigene17043_All	319	T	Y	20	T	35	18	18	C	31	5	5	23	0.319237	1	0	19
Unigene17043_All	864	G	R	57	G	34	17	17	A	31	7	7	24	0.0830849	1	0	62
Unigene17043_All	1008	G	R	99	G	34	22	22	A	35	19	19	41	0.742267	1	0	51
Unigene17043_All	1059	C	Y	57	C	37	43	43	T	37	8	8	51	0.464585	1	0	51
Unigene17043_All	1174	T	Y	99	C	36	20	20	T	33	18	18	38	0.103022	1	0	5
Unigene17043_All	1179	T	Y	99	T	33	28	28	C	37	10	10	38	0.0710375	1	0	5
Unigene17043_All	1210	G	R	35	G	36	23	23	A	36	5	5	28	0.174125	1	0	14
Unigene17043_All	1272	C	Y	47	C	30	6	6	T	35	5	5	11	0.0411255	1	0	48
Unigene17043_All	1552	C	M	99	C	32	14	14	A	34	8	8	22	0.182516	1	0	65
Unigene17043_All	1617	T	W	99	T	36	16	16	A	35	10	10	26	0.541357	1	0	65
Unigene17043_All	1695	A	R	96	A	36	15	15	G	34	8	8	23	0.48741	1	0	78
Unigene17043_All	1836	C	Y	70	C	30	43	43	T	28	12	12	55	0.479956	1	0	39
Unigene17043_All	1875	C	Y	99	C	36	55	55	T	34	13	13	68	0.306123	1	0	24
Unigene17043_All	1899	C	Y	99	C	36	46	46	T	36	30	30	76	0.21582	1	0	24
Unigene17043_All	1932	G	S	99	G	36	50	50	C	36	14	14	64	0.324656	1	0	33
Unigene17043_All	2201	A	R	42	A	34	29	29	G	38	7	7	36	0.555174	1	0	11
Unigene17043_All	2283	C	Y	99	C	36	28	28	T	33	12	12	40	0.0143168	1	0	69
Unigene17043_All	2352	C	Y	98	C	33	24	24	T	35	9	9	33	0.413617	1	0	69
Unigene17043_All	2442	G	R	99	G	35	39	39	A	36	20	20	60	0.60094	1	0	10
Unigene17043_All	2483	A	R	67	A	30	55	55	G	36	10	10	65	0.0107241	1	0	7
Unigene17043_All	2868	G	R	99	G	37	191	191	A	38	22	22	213	0.268497	1	0	157
Unigene17045_All	359	T	W	81	A	37	5	5	T	33	5	5	10	0.52381	1	0	24
Unigene17046_All	1002	C	Y	99	C	36	121	121	T	38	65	65	187	0.0772348	1	0	666
Unigene17046_All	1668	T	Y	38	T	37	35	35	C	39	7	7	42	0.530582	1	0	574
Unigene17047_All	290	C	Y	99	C	32	33	33	T	32	19	19	52	0.136594	1	0	9
Unigene17047_All	301	C	S	36	C	32	50	50	G	34	6	6	56	0.464001	1	0	11
Unigene17047_All	553	G	R	94	G	35	17	17	A	34	9	9	26	0.478938	1	0	54
Unigene17047_All	664	A	W	38	A	36	18	18	T	32	5	5	23	0.099468	1	0	30
Unigene17047_All	738	A	R	85	A	36	24	24	G	36	8	8	32	0.474511	1	0	28
Unigene17047_All	766	T	W	99	T	34	24	24	A	35	8	8	32	0.491497	1	0	28
Unigene17047_All	901	T	K	84	T	37	15	15	G	37	6	6	21	0.683326	1	0	76
Unigene17047_All	1094	A	R	62	A	36	17	17	G	36	6	6	23	0.756783	1	0	41
Unigene17047_All	1135	A	W	99	A	38	10	10	T	35	9	9	19	0.0394466	1	0	41
Unigene17049_All	105	C	Y	97	C	37	16	18	T	38	9	9	27	0.744468	1.07407	0	30
Unigene17049_All	175	C	S	99	C	32	12	12	G	33	9	9	21	0.231957	1	0	70
Unigene17049_All	266	C	Y	99	C	36	39	39	T	37	13	13	52	0.636123	1	0	40
Unigene17049_All	397	C	M	62	C	36	29	29	A	36	6	6	35	0.728783	1	0	46
Unigene17049_All	540	G	R	42	G	37	33	33	A	38	8	8	41	0.27495	1	0	32
Unigene17049_All	572	T	K	21	T	33	46	46	G	39	5	5	51	0.504533	1	0	32
Unigene17049_All	605	C	Y	99	C	31	59	59	T	32	12	12	71	0.254709	1	0	23
Unigene17049_All	628	G	R	49	G	33	63	63	A	25	12	12	75	0.0159326	1	0	23
Unigene17049_All	701	T	Y	99	T	35	28	28	C	38	10	10	38	0.560905	1	0	60
Unigene17049_All	761	C	S	99	C	36	22	22	G	37	7	7	29	0.617171	1	0	30
Unigene17049_All	791	C	Y	40	C	30	24	24	T	36	6	6	30	0.136415	1	0	9
Unigene17049_All	800	C	M	92	C	32	17	17	A	33	7	7	24	0.623469	1	0	9
Unigene17049_All	818	A	W	48	A	34	18	18	T	39	5	5	23	0.0471634	1	0	18
Unigene17050_All	43	T	W	99	T	35	235	235	A	38	19	19	626	0.108969	1	0	48
Unigene17050_All	91	T	W	99	T	34	225	225	A	32	30	30	798	0.135908	1	0	48
Unigene17050_All	197	A	M	86	A	30	228	228	C	31	23	23	1399	0.255615	1	0	13
Unigene17050_All	210	A	W	99	A	24	230	230	T	22	15	15	1074	0.325913	1	0	10
Unigene17050_All	220	G	K	99	G	29	218	218	T	28	37	37	895	0.262251	1	0	10
Unigene17051_All	368	C	Y	99	T	37	41	41	C	35	24	24	65	0.346716	1	0	639
Unigene17051_All	1704	A	W	99	A	38	22	22	T	36	12	12	34	0.436542	1	0	221
Unigene17052_All	137	A	R	90	G	34	7	7	A	34	6	6	13	0.573718	1	0	7
Unigene17052_All	150	A	M	99	C	35	7	7	A	37	6	6	13	0.472611	1	0	13
Unigene17052_All	396	A	W	99	T	36	9	9	A	35	7	7	16	0.268007	1	0	16
Unigene17054_All	125	T	W	67	T	37	9	9	A	36	5	5	14	0.0559441	1	0	296
Unigene17054_All	513	C	Y	99	C	36	43	43	T	37	25	25	68	0.394694	1	0	69
Unigene17054_All	594	G	R	64	G	35	19	19	A	32	8	8	27	0.0374469	1	0	33
Unigene17054_All	627	G	R	82	G	33	16	16	A	34	8	8	24	0.264165	1	0	33
Unigene17054_All	705	C	Y	58	C	36	24	24	T	34	7	7	32	0.528747	1	0	6
Unigene17054_All	711	C	Y	99	C	36	22	22	T	36	12	12	34	0.47877	1	0	6
Unigene17054_All	731	G	K	99	G	37	27	27	T	35	10	10	37	0.0453703	1	0	20
Unigene17054_All	975	C	S	99	C	37	17	17	G	31	9	9	26	0.509697	1	0	126
Unigene17054_All	1101	A	W	83	A	36	6	6	T	36	5	5	11	0.732684	1	0	103
Unigene17054_All	1204	C	Y	94	C	33	19	19	T	34	8	8	27	0.724155	1	0	44
Unigene17054_All	1248	G	K	99	G	34	15	15	T	34	9	9	24	0.5	1	0	44
Unigene17054_All	1317	A	R	85	A	33	13	13	G	36	8	8	21	0.150563	1	0	69
Unigene17054_All	1398	A	R	99	G	37	9	9	A	37	9	9	18	0.36522	1	0	63
Unigene17054_All	1503	A	W	99	A	32	26	26	T	36	12	12	38	0.551638	1	0	36
Unigene17054_All	1539	C	Y	99	T	33	19	19	C	33	16	16	35	0.596236	1	0	36
Unigene17056_All	127	C	Y	41	C	35	12	12	T	38	5	5	17	0.360698	1	0	132
Unigene17056_All	275	T	W	99	A	38	187	187	T	39	67	67	399	0.12683	1	0	10
Unigene17057_All	482	T	Y	99	T	36	11	11	C	37	8	8	19	0.451946	1	0	735
Unigene17058_All	205	C	Y	23	C	36	32	32	T	35	6	6	38	0.49222	1	0	6
Unigene17058_All	211	T	W	54	T	35	31	31	A	38	6	6	37	0.570706	1	0	6
Unigene17058_All	256	C	Y	72	C	35	31	31	T	32	8	8	39	0.739806	1	0	38
Unigene17058_All	294	A	R	87	A	38	31	31	G	36	9	9	40	0.737319	1	0	13
Unigene17058_All	307	A	W	39	A	36	37	37	T	32	7	7	44	0.731254	1	0	13
Unigene17058_All	386	A	R	99	A	36	31	31	G	36	11	11	42	0.47753	1	0	79
Unigene17058_All	490	C	M	99	C	34	26	26	A	37	14	14	40	0.0855728	1	0	57
Unigene17058_All	547	A	W	83	A	37	56	56	T	38	10	10	66	0.320974	1	0	57
Unigene17058_All	696	C	Y	99	C	36	18	18	T	33	13	13	32	0.0340278	1	0	149
Unigene17058_All	1492	A	W	56	A	35	18	18	T	35	5	5	23	0.672784	1	0	384
Unigene17059_All	66	C	Y	62	C	37	97	97	T	38	21	21	118	0.365137	1	0	125
Unigene17059_All	191	G	R	99	G	36	230	230	A	37	25	25	429	0.256607	1	0	125
Unigene17059_All	345	T	Y	99	T	37	197	197	C	37	57	57	257	0.0875118	1	0	154
Unigene17059_All	675	C	Y	99	C	32	164	164	T	29	36	36	202	0.00479794	1	0	146
Unigene17059_All	821	C	Y	99	T	37	112	112	C	37	42	42	154	0.224035	1	0	146
Unigene1705_All	195	G	R	99	G	35	106	106	A	35	17	17	123	0.17506	1	0	12
Unigene1705_All	207	A	R	38	A	36	110	110	G	33	11	11	121	0.349122	1	0	12
Unigene17060_All	52	A	R	99	G	38	33	33	A	37	33	33	66	0.0342977	1	0	116
Unigene17060_All	168	C	Y	99	C	36	123	123	T	37	31	31	154	0.459622	1	0	75
Unigene17060_All	243	A	R	83	A	34	212	212	G	39	16	16	228	0.000150749	1	0	5
Unigene17060_All	248	C	Y	68	C	35	215	215	T	40	16	16	231	1.37e-05	1	0	5
Unigene17060_All	286	G	R	99	G	37	218	218	A	36	37	37	361	0.294185	1	0	14
Unigene17060_All	300	T	Y	99	T	36	218	218	C	35	36	36	337	0.319122	1	0	14
Unigene17060_All	330	C	S	99	C	35	194	194	G	36	61	61	271	0.0931645	1	0	30
Unigene17060_All	370	T	Y	99	T	36	122	122	C	37	48	48	171	0.392909	1	0	40
Unigene17060_All	439	A	M	99	A	38	88	88	C	37	30	30	118	0.219895	1	0	20
Unigene17060_All	459	T	Y	99	T	35	33	33	C	35	10	10	43	0.600585	1	0	20
Unigene17060_All	624	G	K	82	G	34	8	8	T	35	5	5	13	0.76418	1	0	25
Unigene17060_All	799	G	R	99	G	37	29	29	A	35	18	18	47	0.688356	1	0	108
Unigene17060_All	907	C	Y	99	T	34	52	52	C	35	12	12	64	0.0164678	1	0	108
Unigene17060_All	1040	T	Y	99	C	35	49	49	T	33	12	12	61	0.370184	1	0	133
Unigene17060_All	1207	T	Y	99	T	35	103	103	C	34	22	22	125	0.426707	1	0	167
Unigene17060_All	1401	G	R	99	G	37	96	96	A	39	31	31	127	0.0134076	1	0	6
Unigene17060_All	1407	G	R	99	G	38	111	111	A	39	17	17	128	0.128414	1	0	6
Unigene17060_All	1426	T	W	99	T	37	77	77	A	37	33	33	110	0.247739	1	0	6
Unigene17060_All	1432	T	Y	99	T	37	75	75	C	37	29	29	104	0.484099	1	0	6
Unigene17060_All	1472	C	S	99	C	35	48	48	G	38	25	25	73	0.0505971	1	0	40
Unigene17060_All	1689	A	M	38	A	36	48	48	C	34	7	7	56	0.554097	1	0	40
Unigene17060_All	1729	A	W	90	A	37	52	52	T	39	8	8	60	0.62857	1	0	40
Unigene17060_All	1964	C	Y	99	T	34	30	30	C	33	21	21	51	0.589128	1	0	184
Unigene17061_All	564	T	Y	99	C	34	8	8	T	32	6	6	14	0.712954	1	0	193
Unigene17063_All	721	C	M	99	C	33	33	33	A	33	21	21	54	0.691233	1	0	209
Unigene17064_All	136	G	R	99	A	36	108	108	G	36	87	87	196	0.232288	1	0	481
Unigene17064_All	617	G	R	99	G	35	134	134	A	35	29	29	163	0.455946	1	0	157
Unigene17064_All	774	A	W	99	T	37	134	134	A	35	66	66	200	0.00356827	1	0	20
Unigene17064_All	949	T	Y	99	C	33	104	104	T	34	21	21	126	0.375633	1	0	152
Unigene17064_All	1567	G	R	99	G	38	15	15	A	38	11	11	26	0.5	1	0	220
Unigene17064_All	2660	G	R	55	G	33	29	29	A	35	7	7	36	0.48442	1	0	186
Unigene17065_All	194	G	R	66	G	36	85	85	A	37	10	10	95	0.385509	1	0	844
Unigene17065_All	1606	A	W	99	A	34	108	108	T	34	33	33	142	0.24159	1	0	143
Unigene17065_All	2258	A	W	99	A	35	185	185	T	37	17	17	202	0.0517673	1	0	136
Unigene17065_All	2614	C	Y	99	C	37	150	150	T	37	105	105	517	0.187379	1	0	245
Unigene17065_All	2912	C	Y	99	C	32	163	163	T	33	91	91	1525	0.0137864	1	0	52
Unigene17065_All	3019	T	Y	99	C	32	208	208	T	33	45	45	1512	1.1e-06	1	0	5
Unigene17067_All	255	G	R	97	A	35	17	17	G	35	7	7	24	0.426248	1	0	33
Unigene17067_All	288	G	K	99	T	31	13	13	G	35	6	6	19	0.183805	1	0	33
Unigene17067_All	567	G	K	99	G	39	7	7	T	38	7	7	14	0.104312	1	0	64
Unigene17069_All	119	A	R	99	A	35	16	16	G	35	11	11	27	0.432631	1	0	63
Unigene17069_All	218	A	R	66	A	35	31	31	G	37	9	9	40	0.231503	1	0	35
Unigene17069_All	535	C	Y	99	C	34	37	37	T	38	18	18	55	0.0544542	1	0	25
Unigene17069_All	560	T	K	99	T	37	28	28	G	36	17	17	45	0.317378	1	0	25
Unigene17069_All	651	T	K	99	T	36	41	41	G	34	20	20	61	0.418547	1	0	91
Unigene17069_All	770	C	S	99	C	35	28	28	G	39	8	8	36	0.504264	1	0	45
Unigene17069_All	815	T	Y	63	T	35	35	35	C	36	8	8	43	0.658719	1	0	34
Unigene17069_All	849	A	W	71	A	33	31	31	T	36	7	7	39	0.53358	1	0	34
Unigene17069_All	959	T	Y	99	T	37	117	117	C	37	29	29	146	0.389898	1	0	66
Unigene17069_All	1025	G	R	99	G	33	138	138	A	37	28	28	166	0.022584	1	0	66
Unigene17069_All	1121	G	R	99	G	35	121	121	A	36	28	28	150	0.260623	1	0	96
Unigene17069_All	1376	T	Y	99	T	35	23	23	C	35	10	10	33	0.715608	1	0	255
Unigene17069_All	1889	C	Y	86	C	36	36	36	T	32	11	11	47	0.619854	1	0	194
Unigene17071_All	155	T	K	99	G	36	16	16	T	37	8	8	24	0.0224115	1	0	26
Unigene17071_All	181	C	T	31	T	34	22	22	C	41	1	1	23	1	1	0	26
Unigene17071_All	632	A	R	96	G	36	15	15	A	40	6	6	21	0.513702	1	0	351
Unigene17072_All	122	C	Y	66	C	34	28	28	T	36	9	9	37	0.732689	1	0	109
Unigene17072_All	397	T	Y	99	C	37	15	15	T	33	13	13	28	0.308863	1	0	151
Unigene17072_All	548	T	K	99	T	38	31	31	G	36	20	20	51	0.157095	1	0	8
Unigene17072_All	578	T	K	99	T	35	36	36	G	36	16	16	52	0.457047	1	0	20
Unigene17072_All	599	C	Y	99	C	37	37	37	T	37	15	15	52	0.594546	1	0	21
Unigene17073_All	127	T	Y	99	T	37	32	32	C	38	15	15	47	0.45063	1	0	22
Unigene17073_All	149	T	W	99	T	37	33	33	A	37	15	15	48	0.247369	1	0	12
Unigene17073_All	161	C	M	99	C	37	32	32	A	36	13	13	45	0.512106	1	0	12
Unigene17073_All	263	A	W	99	A	38	43	43	T	39	8	8	51	0.605454	1	0	29
Unigene17073_All	292	A	W	99	A	36	44	44	T	33	11	11	55	0.114939	1	0	7
Unigene17073_All	299	C	Y	99	C	35	23	23	T	37	17	17	40	0.171135	1	0	7
Unigene17073_All	580	C	Y	99	C	31	146	146	T	33	97	97	247	0.138233	1	0	27
Unigene17073_All	607	G	R	99	G	33	225	225	A	35	17	17	242	0.384136	1	0	27
Unigene17073_All	655	G	R	99	G	36	205	205	A	36	50	50	310	0.0753491	1	0	48
Unigene17073_All	724	C	S	99	C	34	86	86	G	27	23	23	109	0.00104113	1	0	12
Unigene17073_All	736	T	Y	99	T	36	108	108	C	34	37	37	145	0.00940535	1	0	12
Unigene17073_All	769	C	Y	74	C	35	126	126	T	39	12	12	138	0.0214295	1	0	33
Unigene17073_All	802	G	R	99	G	35	73	73	A	32	18	18	91	0.0830438	1	0	33
Unigene17073_All	919	A	R	99	A	35	39	39	G	35	32	32	71	0.183691	1	0	41
Unigene17073_All	960	A	R	99	A	38	180	180	G	37	75	75	265	0.133375	1	0	9
Unigene17073_All	969	G	R	99	G	38	231	231	A	37	24	24	264	0.341438	1	0	9
Unigene17073_All	1276	T	Y	99	T	36	85	85	C	33	31	31	116	0.18699	1	0	108
Unigene17073_All	1384	A	R	99	A	37	73	73	G	36	32	32	105	0.0421336	1	0	66
Unigene17073_All	1450	A	R	54	A	38	85	85	G	39	9	9	94	0.290288	1	0	66
Unigene17073_All	1549	T	K	99	T	35	68	68	G	32	31	31	99	0.00190505	1	0	24
Unigene17073_All	1573	A	R	99	A	35	77	77	G	36	22	22	99	0.308261	1	0	24
Unigene17073_All	1606	G	K	99	G	36	71	71	T	36	16	16	87	0.480339	1	0	33
Unigene17073_All	1660	T	W	99	T	36	50	50	A	35	16	16	66	0.0356942	1	0	54
Unigene17073_All	1744	A	R	99	A	36	55	55	G	35	24	24	79	0.239196	1	0	27
Unigene17073_All	1771	C	Y	55	C	31	70	70	T	30	10	10	80	0.363489	1	0	27
Unigene17073_All	2062	A	R	99	A	36	127	127	G	37	79	79	206	0.0286267	1	0	18
Unigene17074_All	192	G	R	99	G	35	183	183	A	37	72	72	511	0.00231244	1	0	20
Unigene17074_All	212	C	M	99	C	37	220	220	A	38	35	35	396	0.0104946	1	0	20
Unigene17074_All	521	T	Y	99	T	34	227	227	C	36	28	28	269	0.0358911	1	0	145
Unigene17074_All	666	A	W	39	A	34	152	152	T	36	8	8	160	0.362303	1	0	145
Unigene17074_All	1164	C	Y	99	C	36	69	69	T	35	22	22	91	0.0821978	1	0	138
Unigene17074_All	1302	C	Y	99	C	36	66	66	T	36	17	17	83	0.340222	1	0	138
Unigene17074_All	1608	C	M	99	C	35	31	31	A	36	9	9	40	0.375142	1	0	169
Unigene17074_All	1777	C	Y	99	C	37	59	59	T	36	42	42	101	0.150674	1	0	169
Unigene17079_All	246	A	W	47	A	36	45	97	T	37	7	7	104	0.66862	1.5	0	326
Unigene17079_All	681	T	W	20	T	35	42	42	A	34	6	6	48	0.0963871	1	0	109
Unigene17079_All	892	A	R	20	A	38	36	36	G	39	5	5	41	0.274039	1	0	35
Unigene17079_All	1656	T	Y	99	T	34	99	99	C	38	39	39	138	0.0320667	1	0	108
Unigene17079_All	1764	C	Y	99	C	37	98	98	T	37	16	16	114	0.300802	1	0	108
Unigene17079_All	1913	G	K	99	G	35	52	52	T	36	11	11	63	0.168788	1	0	84
Unigene17079_All	2034	A	W	99	A	37	62	62	T	37	12	12	74	0.283687	1	0	37
Unigene17079_All	2075	G	R	99	A	36	61	61	G	37	24	24	85	0.183249	1	0	41
Unigene17079_All	2172	T	K	99	T	34	160	160	G	33	16	16	176	0.401453	1	0	35
Unigene17079_All	2207	A	R	97	A	33	164	164	G	30	14	14	178	0.129377	1	0	19
Unigene17079_All	2226	G	R	99	G	32	164	164	A	32	13	13	177	0.211475	1	0	19
Unigene17079_All	2248	A	R	24	A	32	133	133	G	36	8	8	142	0.0829014	1	0	12
Unigene17079_All	2260	C	S	99	C	33	182	182	G	30	20	20	202	0.0803983	1	0	12
Unigene1707_All	443	G	R	52	G	36	24	24	A	38	7	7	31	0.107953	1	0	376
Unigene17080_All	307	G	K	99	G	38	17	17	T	37	17	17	34	0.258862	1	0	36
Unigene17080_All	343	T	Y	99	C	37	21	21	T	38	18	18	39	0.0593781	1	0	36
Unigene17081_All	182	T	Y	99	T	36	18	18	C	36	17	17	35	0.740257	1	0	16
Unigene17081_All	198	G	R	99	A	38	16	16	G	36	17	17	33	0.068185	1	0	16
Unigene17081_All	383	C	M	95	C	38	16	16	A	34	7	7	23	0.569405	1	0	185
Unigene17081_All	929	G	R	99	G	36	40	40	A	38	11	11	51	0.56526	1	0	481
Unigene17081_All	1496	A	R	99	A	33	76	76	G	34	30	30	107	0.0913391	1	0	48
Unigene17081_All	1544	G	R	59	G	37	76	76	A	37	11	11	87	0.479628	1	0	48
Unigene17081_All	1619	T	W	99	T	35	127	127	A	36	16	16	143	0.214505	1	0	15
Unigene17081_All	1634	C	Y	99	C	34	99	99	T	36	43	43	142	0.0595697	1	0	15
Unigene17082_All	838	C	S	99	C	36	44	44	G	39	12	12	56	0.0187978	1	0	31
Unigene17082_All	869	G	S	94	G	35	48	48	C	36	9	9	58	0.705326	1	0	31
Unigene17082_All	1126	T	Y	99	T	35	41	41	C	37	11	11	52	0.421226	1	0	257
Unigene17083_All	415	A	R	99	A	35	57	57	G	33	22	22	79	0.319074	1	0	715
Unigene17083_All	1130	C	Y	99	C	34	76	76	T	36	31	31	107	0.123605	1	0	403
Unigene17085_All	77	G	R	71	G	38	5	5	A	38	5	5	10	0.345238	1	0	54
Unigene17085_All	912	T	Y	31	T	36	16	16	C	37	5	5	21	0.247481	1	0	56
Unigene17085_All	1316	T	W	99	T	35	36	36	A	35	16	16	52	0.682829	1	0	82
Unigene17085_All	1398	T	K	99	T	35	33	33	G	35	18	18	51	0.634568	1	0	82
Unigene17085_All	1619	T	K	99	T	31	70	70	G	34	34	34	105	0.0059442	1	0	54
Unigene17085_All	1673	A	R	99	A	34	53	53	G	33	11	11	64	0.159498	1	0	54
Unigene17085_All	1739	C	S	99	C	37	40	40	G	37	33	33	73	0.173065	1	0	9
Unigene17085_All	1748	G	R	81	G	37	62	62	A	39	11	11	73	0.104427	1	0	9
Unigene17085_All	1868	T	Y	50	T	32	50	50	C	37	8	8	58	0.565063	1	0	24
Unigene17085_All	2074	A	W	37	A	38	35	35	T	39	6	6	41	0.421643	1	0	28
Unigene17085_All	2102	C	Y	97	C	34	26	26	T	37	10	10	36	0.23765	1	0	28
Unigene17085_All	2203	C	M	38	C	34	16	16	A	37	5	5	21	0.137402	1	0	17
Unigene17085_All	2220	G	R	66	G	35	17	17	A	33	8	8	25	0.601586	1	0	17
Unigene17086_All	270	A	W	54	A	35	46	46	T	39	8	8	54	0.502246	1	0	27
Unigene17086_All	297	A	W	37	A	33	76	76	T	34	7	7	83	0.41246	1	0	25
Unigene17087_All	721	C	Y	99	C	37	8	8	T	35	7	7	15	0.477545	1	0	356
Unigene17088_All	181	A	R	99	G	36	94	94	A	34	66	66	161	0.140526	1	0	31
Unigene17089_All	357	A	R	99	A	34	232	232	G	31	22	22	349	0.222986	1	0	60
Unigene17089_All	417	T	W	99	T	36	172	172	A	37	37	37	209	0.0180384	1	0	60
Unigene17089_All	764	T	W	99	T	37	88	88	A	37	16	16	105	0.161937	1	0	100
Unigene17089_All	864	G	R	99	G	33	134	134	A	32	26	26	162	0.281578	1	0	100
Unigene17089_All	1014	A	W	96	A	33	50	50	T	34	9	9	59	0.727319	1	0	150
Unigene1708_All	86	A	R	99	A	37	49	49	G	37	21	21	70	0.398852	1	0	16
Unigene1708_All	102	G	R	99	G	37	46	46	A	37	22	22	68	0.221574	1	0	16
Unigene17090_All	1737	C	Y	99	C	34	180	180	T	34	37	37	217	0.478792	1	0	469
Unigene17092_All	87	T	Y	88	T	38	49	49	C	38	11	11	60	0.425306	1	0	21
Unigene17092_All	108	G	S	99	G	38	46	46	C	37	11	11	57	0.696954	1	0	14
Unigene17092_All	122	G	R	90	G	36	43	43	A	37	11	11	54	0.125017	1	0	14
Unigene17094_All	1669	T	Y	99	T	35	16	16	C	34	11	11	27	0.670006	1	0	16
Unigene17094_All	1685	A	W	99	A	37	10	10	T	30	9	9	19	0.501905	1	0	16
Unigene17094_All	1730	G	R	65	G	39	13	13	A	39	6	6	19	0.161433	1	0	45
Unigene17095_All	202	G	R	99	G	35	228	228	A	36	25	25	327	0.360549	1	0	45
Unigene17095_All	247	G	R	99	G	37	218	218	A	35	37	37	337	0.0437088	1	0	45
Unigene17095_All	295	G	R	99	G	33	240	240	A	35	15	15	258	0.00735778	1	0	48
Unigene17095_All	443	C	Y	99	C	36	46	46	T	35	21	21	67	0.121175	1	0	22
Unigene17095_All	556	T	Y	99	T	35	98	98	C	33	48	48	147	0.178619	1	0	96
Unigene17095_All	652	T	Y	90	T	32	128	128	C	32	13	13	142	0.430698	1	0	6
Unigene17095_All	658	G	R	99	G	33	189	189	A	33	16	16	205	0.416572	1	0	6
Unigene17095_All	790	G	R	99	G	35	62	62	A	34	42	42	104	0.2211	1	0	132
Unigene17095_All	940	G	R	99	G	30	132	132	A	32	15	15	148	0.454149	1	0	150
Unigene17095_All	1102	A	M	99	A	32	39	39	C	35	15	15	54	0.251592	1	0	81
Unigene17095_All	1183	G	K	99	G	32	30	30	T	36	11	11	41	0.229347	1	0	81
Unigene17096_All	148	T	K	99	T	37	49	49	G	37	21	21	70	0.102258	1	0	51
Unigene17097_All	174	A	R	41	A	39	86	86	G	38	11	11	97	0.16393	1	0	337
Unigene17097_All	1055	T	K	75	T	33	241	241	G	32	12	12	352	0.234692	1	0	78
Unigene17097_All	1133	A	R	99	A	33	234	234	G	36	21	21	299	0.00548881	1	0	51
Unigene17097_All	1184	A	R	99	A	37	176	176	G	37	79	79	359	0.444147	1	0	51
Unigene17097_All	1604	A	R	36	A	34	115	115	G	38	9	9	124	0.0343616	1	0	420
Unigene17098_All	153	A	R	99	A	36	52	52	G	36	25	25	77	0.467487	1	0	5
Unigene17098_All	158	A	R	99	A	37	63	63	G	38	14	14	77	0.193501	1	0	5
Unigene17099_All	20	A	W	72	T	37	5	5	A	31	5	5	10	0.210317	1	0	18
Unigene17099_All	74	C	S	60	C	36	22	22	G	35	6	6	28	0.341182	1	0	54
Unigene17099_All	671	T	W	92	T	36	25	25	A	37	7	7	32	0.344103	1	0	60
Unigene17099_All	731	T	W	99	T	37	38	38	A	35	18	18	56	0.524405	1	0	60
Unigene17099_All	915	G	R	55	G	34	27	27	A	36	8	8	35	0.134377	1	0	44
Unigene17099_All	959	A	R	47	A	33	42	42	G	31	14	14	57	0.0801691	1	0	33
Unigene17099_All	992	T	Y	99	T	38	62	62	C	37	28	28	90	0.0835757	1	0	33
Unigene17099_All	1196	C	Y	99	C	37	112	112	T	35	15	15	127	0.0210824	1	0	147
Unigene17099_All	1343	G	R	99	G	37	113	113	A	39	28	28	141	0.0560098	1	0	18
Unigene17099_All	1361	C	Y	99	C	37	97	97	T	37	16	16	113	0.42327	1	0	18
Unigene17099_All	1487	A	M	99	A	36	196	196	C	36	59	59	425	0.463105	1	0	48
Unigene17099_All	1535	C	Y	99	C	34	205	205	T	28	47	47	525	1.13e-05	1	0	48
Unigene17099_All	1736	A	R	99	A	36	171	171	G	37	70	70	241	0.0506645	1	0	84
Unigene17099_All	1831	T	Y	99	T	34	165	165	C	35	77	77	242	0.256381	1	0	11
Unigene17099_All	1904	T	Y	99	T	34	168	168	C	35	86	86	372	0.42026	1	0	73
Unigene17099_All	2007	T	Y	99	T	37	196	196	C	37	59	59	262	0.290248	1	0	103
Unigene17099_All	2150	T	Y	99	T	36	48	48	C	37	13	13	61	0.0714139	1	0	143
Unigene17099_All	2345	T	Y	99	T	36	120	120	C	38	19	19	141	0.0857656	1	0	121
Unigene17099_All	2466	T	W	87	T	38	13	13	A	38	6	6	19	0.415708	1	0	53
Unigene17099_All	2519	G	R	99	G	36	13	13	A	36	11	11	24	0.388105	1	0	53
Unigene17099_All	2647	A	M	99	A	33	200	200	C	34	30	30	230	0.343973	1	0	30
Unigene17099_All	2677	A	W	99	A	34	181	181	T	38	74	74	296	2.07e-06	1	0	30
Unigene17099_All	2785	T	Y	99	T	36	58	58	C	37	29	29	87	0.0981654	1	0	42
Unigene170_All	132	G	K	99	G	34	42	42	T	35	21	21	63	0.345401	1	0	102
Unigene170_All	234	T	W	99	T	35	36	36	A	34	9	9	45	0.598309	1	0	102
Unigene17100_All	1140	C	Y	99	C	36	164	164	T	37	23	23	188	0.112073	1	0	121
Unigene17100_All	1261	T	K	99	T	34	43	43	G	35	10	10	53	0.690627	1	0	37
Unigene17101_All	297	G	K	65	G	36	12	12	T	37	5	5	17	0.643584	1	0	94
Unigene17102_All	347	T	W	99	T	33	13	13	A	32	9	9	22	0.448018	1	0	150
Unigene17102_All	497	G	R	68	G	36	12	12	A	35	6	6	18	0.481793	1	0	9
Unigene17102_All	506	T	Y	62	T	37	14	14	C	36	7	7	21	0.580577	1	0	9
Unigene17102_All	653	T	Y	99	T	38	12	12	C	34	10	10	22	0.58657	1	0	99
Unigene17103_All	162	T	Y	54	T	37	7	7	C	32	5	5	12	0.5	1	0	357
Unigene17103_All	601	C	Y	69	C	37	81	81	T	36	15	15	96	0.163843	1	0	113
Unigene17103_All	714	T	K	99	T	35	142	142	G	33	23	23	165	0.309827	1	0	98
Unigene17103_All	812	A	R	99	A	36	83	83	G	36	18	18	101	0.371329	1	0	13
Unigene17103_All	825	G	R	99	G	35	65	65	A	36	35	35	100	0.348179	1	0	13
Unigene17103_All	955	A	M	99	A	35	103	103	C	37	28	28	131	0.160856	1	0	65
Unigene17103_All	1020	C	M	99	C	35	124	124	A	34	37	37	161	0.314842	1	0	65
Unigene17103_All	1109	G	K	76	G	38	175	175	T	37	11	11	186	0.214473	1	0	89
Unigene17103_All	1261	A	R	99	A	36	206	206	G	36	48	48	254	0.405599	1	0	114
Unigene17103_All	1375	A	R	99	A	36	159	159	G	36	34	34	193	0.0397253	1	0	64
Unigene17103_All	1439	G	R	69	G	38	36	36	A	39	9	9	45	0.121807	1	0	64
Unigene17104_All	419	C	M	99	C	33	28	28	A	36	16	16	44	0.502242	1	0	84
Unigene17104_All	503	A	R	99	G	36	75	75	A	34	32	32	107	0.0699052	1	0	84
Unigene17104_All	647	T	Y	99	C	38	64	64	T	37	30	30	94	0.392918	1	0	72
Unigene17104_All	719	C	T	77	T	32	43	43	C	0	0	0	43	1	1	0	72
Unigene17104_All	1038	T	Y	99	C	33	16	16	T	33	12	12	28	0.754553	1	0	48
Unigene17104_All	1086	C	Y	54	C	36	18	18	T	37	6	6	24	0.290261	1	0	23
Unigene17104_All	1109	A	R	99	G	36	13	13	A	37	8	8	21	0.728883	1	0	23
Unigene17104_All	1341	G	S	62	G	34	27	27	C	34	6	6	33	0.586965	1	0	86
Unigene17105_All	38	G	R	84	G	37	14	14	A	39	7	7	21	0.62199	1	0	27
Unigene17105_All	115	T	W	44	T	32	27	27	A	35	5	5	32	0.590338	1	0	48
Unigene17105_All	388	C	S	99	C	36	11	11	G	38	7	7	18	0.552728	1	0	81
Unigene17107_All	282	C	Y	61	C	33	15	15	T	38	6	6	21	0.566803	1	0	49
Unigene17107_All	378	A	R	99	G	35	7	7	A	33	7	7	14	0.613928	1	0	96
Unigene17107_All	477	G	K	73	G	37	7	7	T	30	6	6	13	0.222611	1	0	99
Unigene17108_All	246	C	M	74	C	39	6	6	A	35	5	5	11	0.123377	1	0	15
Unigene17108_All	291	T	Y	79	C	37	5	5	T	37	5	5	10	0.5	1	0	30
Unigene17109_All	539	C	Y	93	T	35	8	8	C	34	5	5	13	0.362082	1	0	23
Unigene17111_All	363	T	K	99	G	38	15	15	T	35	9	9	24	0.0968464	1	0	77
Unigene17112_All	168	T	W	99	T	38	47	47	A	37	10	10	57	0.664177	1	0	15
Unigene17112_All	284	T	Y	99	T	35	16	16	C	36	14	14	30	0.652099	1	0	33
Unigene17112_All	340	A	R	66	A	31	9	9	G	33	5	5	14	0.674825	1	0	21
Unigene17113_All	466	A	R	58	A	38	33	33	G	38	7	7	40	0.644212	1	0	35
Unigene17113_All	805	A	W	99	A	38	30	30	T	38	12	12	44	0.355387	1	0	110
Unigene17114_All	447	A	R	44	A	38	14	14	G	36	5	5	19	0.574389	1	0	60
Unigene17115_All	637	A	W	99	A	33	243	243	T	32	12	12	688	0.20272	1	0	163
Unigene17115_All	800	C	S	34	C	37	246	246	G	36	9	9	441	0.164092	1	0	36
Unigene17115_All	836	G	R	49	G	33	242	242	A	32	12	12	255	0.0933556	1	0	36
Unigene17115_All	1143	G	K	99	G	37	209	209	T	37	46	46	323	0.455606	1	0	11
Unigene17115_All	1154	A	R	76	A	34	242	242	G	34	13	13	337	0.434086	1	0	11
Unigene17115_All	2024	A	W	99	T	36	136	136	A	35	53	53	189	0.333345	1	0	255
Unigene17115_All	2279	C	Y	99	C	35	135	135	T	35	54	54	189	0.253429	1	0	30
Unigene17115_All	2309	C	S	99	C	36	136	136	G	38	107	107	243	0.00645209	1	0	30
Unigene17115_All	2524	C	Y	99	C	38	65	65	T	36	38	38	103	0.0312676	1	0	215
Unigene17116_All	1695	C	Y	99	C	32	67	67	T	33	28	28	95	0.0414064	1	0	72
Unigene17116_All	1767	G	R	99	G	35	140	140	A	34	14	14	154	0.313102	1	0	72
Unigene17117_All	562	T	W	23	T	37	29	29	A	38	5	5	34	0.443822	1	0	15
Unigene17117_All	1111	G	R	25	G	37	58	58	A	39	8	8	66	0.0689919	1	0	16
Unigene17117_All	1237	A	R	36	A	39	23	23	G	40	5	5	28	0.611849	1	0	126
Unigene17119_All	134	T	Y	93	T	39	40	40	C	38	15	15	55	0.689433	1	0	364
Unigene17119_All	498	T	W	99	T	34	78	78	A	34	44	44	122	0.423894	1	0	42
Unigene17119_All	540	T	Y	99	T	37	88	88	C	35	60	60	149	0.00087907	1	0	42
Unigene17119_All	1101	C	M	99	C	36	25	25	A	37	16	16	41	0.494732	1	0	119
Unigene17119_All	1220	A	R	86	G	33	8	8	A	32	6	6	14	0.474858	1	0	119
Unigene17123_All	128	T	K	97	T	36	7	7	G	35	6	6	14	0.611305	1	0	29
Unigene17123_All	157	T	K	78	T	37	9	9	G	35	6	6	15	0.264336	1	0	29
Unigene17123_All	323	T	Y	99	T	34	16	16	C	33	10	10	26	0.311368	1	0	48
Unigene17123_All	371	T	Y	74	T	37	22	22	C	38	8	8	30	0.138302	1	0	48
Unigene17123_All	827	T	Y	99	C	37	13	13	T	34	9	9	22	0.573013	1	0	48
Unigene17123_All	875	A	W	71	A	35	35	35	T	37	7	7	42	0.33378	1	0	40
Unigene17123_All	915	G	R	48	G	34	36	36	A	34	12	12	48	0.56053	1	0	14
Unigene17123_All	929	T	Y	99	T	34	28	28	C	37	12	12	40	0.504359	1	0	14
Unigene17123_All	1067	T	W	99	T	31	28	28	A	35	14	14	44	0.0245028	1	0	107
Unigene17123_All	1174	A	M	99	A	36	37	37	C	38	13	13	50	0.55461	1	0	107
Unigene17123_All	1283	G	R	57	G	36	34	34	A	36	8	8	42	0.728123	1	0	91
Unigene17123_All	1374	G	R	99	G	36	74	74	A	37	14	14	88	0.396511	1	0	5
Unigene17123_All	1379	C	Y	99	C	37	46	46	T	38	27	27	73	0.411839	1	0	5
Unigene17123_All	1414	A	W	99	A	34	83	83	T	35	17	17	100	0.275435	1	0	35
Unigene17123_All	1484	G	R	99	G	37	45	45	A	40	20	20	65	0.000331958	1	0	70
Unigene17124_All	164	G	R	60	G	33	9	9	A	35	5	5	15	0.62962	1	0	8
Unigene17124_All	275	A	R	93	A	38	12	12	G	39	8	8	20	0.213432	1	0	6
Unigene17124_All	281	G	K	99	G	37	12	12	T	39	8	8	20	0.455053	1	0	6
Unigene17124_All	336	T	W	99	T	37	9	9	A	36	6	6	15	0.693906	1	0	13
Unigene17125_All	52	T	Y	99	T	39	17	17	C	39	16	16	33	0.725261	1	0	172
Unigene17125_All	224	G	K	29	G	36	31	31	T	35	5	5	36	0.482334	1	0	19
Unigene17125_All	570	T	K	99	T	31	34	34	G	32	28	28	62	0.647138	1	0	130
Unigene17125_All	764	A	M	46	A	36	19	19	C	39	6	6	25	0.0295709	1	0	61
Unigene17128_All	762	T	Y	94	T	35	49	49	C	35	10	10	59	0.588239	1	0	87
Unigene17128_All	849	T	Y	99	T	34	48	48	C	35	26	26	74	0.384229	1	0	84
Unigene17128_All	1101	C	Y	99	C	38	32	32	T	35	32	32	64	0.0392923	1	0	45
Unigene17128_All	1146	C	Y	99	C	33	54	54	T	35	33	33	87	0.0566721	1	0	45
Unigene17128_All	1203	C	M	26	C	37	122	122	A	38	6	6	128	0.350755	1	0	57
Unigene17128_All	1542	A	R	99	A	37	170	170	G	37	42	42	212	0.174069	1	0	36
Unigene17129_All	109	G	R	99	A	35	95	95	G	35	40	40	135	0.269481	1	0	51
Unigene17129_All	160	G	R	99	G	35	167	167	A	35	21	21	188	0.313816	1	0	51
Unigene17129_All	226	G	R	99	G	35	203	203	A	38	52	52	304	1.4e-06	1	0	51
Unigene17129_All	277	C	Y	99	C	35	220	220	T	34	34	34	257	0.0543546	1	0	15
Unigene17129_All	292	T	Y	99	T	36	211	211	C	34	30	30	241	0.0155214	1	0	15
Unigene17129_All	334	T	Y	99	T	37	217	217	C	37	38	38	321	0.469118	1	0	18
Unigene17129_All	352	C	Y	99	C	36	154	154	T	37	87	87	241	0.0538839	1	0	18
Unigene17129_All	613	A	R	99	A	35	186	186	G	35	65	65	275	0.383727	1	0	33
Unigene17129_All	646	G	K	29	G	37	246	246	T	37	9	9	398	0.146537	1	0	33
Unigene17129_All	703	C	Y	99	C	35	207	207	T	35	47	47	466	0.316201	1	0	57
Unigene17129_All	768	G	R	99	G	37	173	173	A	37	82	82	516	0.368327	1	0	65
Unigene17129_All	940	A	R	99	A	28	178	178	G	25	77	77	772	4.07e-06	1	0	12
Unigene17129_All	952	G	R	99	G	34	170	170	A	32	85	85	341	0.00242444	1	0	12
Unigene1712_All	172	G	R	99	G	33	53	53	A	34	20	20	74	0.196709	1	0	136
Unigene1712_All	308	A	R	95	A	37	240	240	G	36	15	15	573	0.446894	1	0	30
Unigene1712_All	338	C	M	99	C	38	165	165	A	39	90	90	558	0.0275043	1	0	30
Unigene17131_All	980	T	Y	92	T	35	8	8	C	37	6	6	14	0.688645	1	0	213
Unigene17131_All	1193	T	Y	90	T	33	23	23	C	35	8	8	31	0.590512	1	0	27
Unigene17131_All	1220	G	R	86	G	35	34	34	A	33	9	9	43	0.254157	1	0	27
Unigene17134_All	82	C	Y	99	T	35	18	18	C	38	15	15	33	0.0674553	1	0	67
Unigene17134_All	149	C	Y	34	C	31	27	27	T	35	6	6	33	0.130133	1	0	29
Unigene17134_All	178	G	K	60	G	33	30	30	T	31	7	7	37	0.26527	1	0	29
Unigene17134_All	335	C	M	99	C	35	31	31	A	39	9	9	40	0.530351	1	0	157
Unigene17134_All	866	A	M	93	A	34	9	9	C	34	7	7	16	0.459091	1	0	117
Unigene17134_All	983	T	K	79	T	34	16	16	G	36	7	7	23	0.35988	1	0	35
Unigene17134_All	1018	C	Y	51	C	37	12	12	T	36	5	5	18	0.699741	1	0	35
Unigene17134_All	1130	G	K	99	G	36	26	26	T	36	13	13	39	0.651659	1	0	18
Unigene17134_All	1148	A	R	99	A	35	38	38	G	36	17	17	55	0.254948	1	0	18
Unigene17134_All	1226	T	Y	99	T	34	42	42	C	32	26	26	70	0.145997	1	0	78
Unigene17134_All	1361	A	R	66	A	31	116	116	G	25	13	13	129	0.072803	1	0	25
Unigene17134_All	1673	T	Y	99	T	36	237	237	C	36	18	18	300	0.203167	1	0	36
Unigene17134_All	1709	T	Y	99	T	38	203	203	C	37	52	52	350	0.0780669	1	0	19
Unigene17134_All	1728	T	K	99	T	37	230	230	G	37	25	25	414	0.485765	1	0	19
Unigene17134_All	1817	T	W	99	T	34	235	235	A	32	20	20	530	0.0294776	1	0	62
Unigene17134_All	1879	T	Y	99	T	34	199	199	C	34	55	55	275	0.473961	1	0	62
Unigene17135_All	293	G	R	56	G	31	9	9	A	38	5	5	14	0.0734266	1	0	139
Unigene17136_All	148	G	S	99	G	33	76	76	C	34	17	17	93	0.172503	1	0	541
Unigene17138_All	411	A	W	23	A	32	68	68	T	31	6	6	74	0.197238	1	0	23
Unigene17138_All	434	T	W	85	T	29	38	38	A	32	8	8	46	0.545338	1	0	23
Unigene17138_All	1100	G	R	99	G	36	43	43	A	36	17	17	60	0.474099	1	0	112
Unigene17138_All	1212	C	Y	99	C	34	68	68	T	37	27	27	95	0.0331863	1	0	112
Unigene17138_All	1752	C	Y	79	C	34	28	28	T	34	8	8	36	0.375577	1	0	540
Unigene17139_All	1757	T	Y	99	T	34	116	116	C	32	30	30	146	0.140058	1	0	6
[truncated: 35,897 more rows]
