# Supplementary material for: Nutrigenomics in Arma chinensis: Transcriptome Analysis of Arma chinensis Fed on Artificial Diet and Chinese Oak Silk Moth Antheraea pernyi Pupae
Source: PLoS One. 2013 Apr 11;8(4):e60881. doi: 10.1371/journal.pone.0060881 (PMC3623872; doi:10.1371/journal.pone.0060881)
Supplement: Table S13 — Putative microsatellite loci in Arma chinensis. (XLS) [file pone.0060881.s016.xls]

## Sheet: SSR
Supplemental Table S13. Putative microsatellite loci in Arma chinensis
Sequence source file: "/ifshk1/BC_gag/PROJECT/RNA/ARMupfT/00data/HSZ12047_ARMupfT/assembly/2.Unigene/All-Unigene.fa"
Definement of microsatellites (unit size / minimum number of repeats):
(1/12) (2/6) (3/5) (4/5) (5/4) (6/4)
Maximal number of bases interrupting 2 SSRs in a compound microsatellite: 100
RESULTS OF MICROSATELLITE SEARCH
================================
Total number of sequences examined: 55189
Total size of examined sequences (bp): 32153970
Total number of identified SSRs: 4115
Number of sequences containing SSR: 3814
Number of sequences containing more than 1 SSR: 269
Number of SSRs present in compound formation: 153
Distribution to different repeat type classes
---------------------------------------------
Unit size	Number of SSRs
1	2759
2	697
3	592
4	19
5	34
6	14
Frequency of identified SSR motifs
----------------------------------
Repeats	4	5	6	7	8	9	10	11	12	13	14	15	16	17	18	19	20	21	22	23	total
A	-	-	-	-	-	-	-	-	403	266	169	119	76	51	44	49	58	49	20	14	1318
C	-	-	-	-	-	-	-	-	2	2		1								1	6
G	-	-	-	-	-	-	-	-	4	5	1							1			11
T	-	-	-	-	-	-	-	-	488	281	183	110	73	50	58	60	56	35	21	9	1424
AC	-	-	14	11	8	2	5	7													47
AG	-	-	13	4	8		2	1	1												29
AT	-	-	136	51	18	7	9	5	2									1			229
CA	-	-	19	5	6	5	3	2													40
CT	-	-	15	7	7	2	3	5	1												40
GA	-	-	5	2	4	2	1	6													20
GC	-	-				1															1
GT	-	-	13	12	5	2	5	15													52
TA	-	-	77	40	14	3	1	2													137
TC	-	-	19	5	7	2	4	6	1												44
TG	-	-	27	9	6	5	6	4	1												58
AAC	-	4	1																		5
AAG	-	26	5	1																	32
AAT	-	23	8	5	1																37
ACA	-	1	1																		2
ACC	-	8																			8
ACT	-		1																		1
AGA	-	9	6	1																	16
AGC	-		1																		1
AGG	-	1																			1
ATA	-	18	4	1	1																24
ATC	-	3	4	1																	8
ATG	-	15																			15
ATT	-	24	7																		31
CAA	-	4	3																		7
CAC	-	3																			3
CAG	-	7	2																		9
CAT	-	4	1	2							1										8
CCA	-	13	2																		15
CCT	-	6	3																		9
CGG	-	1																			1
CGT	-		1																		1
CTA	-	1																			1
CTC	-	5			1																6
CTG	-	2	2																		4
CTT	-	25	6	1																	32
GAA	-	5	7		1															1	14
GAG	-	6			1																7
GAT	-	14	1																		15
GCA	-	1	2																		3
GCC	-	1																			1
GCG	-	3																			3
GCT	-	2		1																	3
GGA	-	9	1																		10
GGC	-		1																		1
GGT	-	5																			5
GTA	-	1																			1
GTT	-	3	1																		4
TAA	-	13	7	1																	21
TAT	-	8	6	1																	15
TCA	-	25	16	4	3																48
TCC	-	2	8	2																	12
TCG	-			2																	2
TCT	-	28	6																		34
TGA	-	4	7	2																	13
TGC	-	5	1				1														7
TGG	-	3	1																		4
TGT	-	4	2																		6
TTA	-	28	5	4	1	1															39
TTC	-	26	11	5																	42
TTG	-	4	1																		5
AAAG	-	1																			1
AAAT	-		1																		1
AACA	-	1																			1
AATA	-	2																			2
ATAC	-			1																	1
ATAG	-	1	1																		2
ATTA	-		1																		1
ATTC	-	1																			1
CAGA	-		1																		1
GATT	-	1																			1
GTGC	-		1																		1
TAAA	-	1																			1
TATT	-	1																			1
TTAT	-	4																			4
AAAAC	1																				1
AAAAG	1																				1
AAAAT	2																				2
AAATA	1																				1
AACCT	1																				1
AAGGA	1																				1
AAGTA	1																				1
AATAA		1																			1
AATGA	2																				2
ATAGA		1																			1
CAATA	2																				2
GTATT		1																			1
TAGAA	3			2																	5
TAGAT	2																				2
TATTG	2																				2
TATTT	1																				1
TGGTT	1																				1
TTACA	1																				1
TTCTA	5	1																			6
TTTTA	1																				1
AAATAA	1																				1
AGATCC	1																				1
AGCAGT	1																				1
AGCTGA	1																				1
ATAGTT	1																				1
CCACAA	1																				1
CTTTTT	1																				1
GGAGGT	2																				2
TATGTA	1																				1
TCCAGT	1																				1
TGCGGA	1	1																			2
TTATGG	1																				1
Frequency of classified repeat types (considering sequence complementary)
-------------------------------------------------------------------------
Repeats	4	5	6	7	8	9	10	11	12	13	14	15	16	17	18	19	20	21	22	23	total
A/T	-	-	-	-	-	-	-	-	891	547	352	229	149	101	102	109	114	84	41	23	2742
C/G	-	-	-	-	-	-	-	-	6	7	1	1						1		1	17
AC/GT	-	-	73	37	25	14	19	28	1												197
AG/CT	-	-	52	18	26	6	10	18	3												133
AT/AT	-	-	213	91	32	10	10	7	2									1			366
CG/CG	-	-				1															1
AAC/GTT	-	20	9																		29
AAG/CTT	-	119	41	8	1															1	170
AAT/ATT	-	114	37	12	3	1															167
ACC/GGT	-	32	3																		35
ACG/CGT	-		1	2																	3
ACT/AGT	-	2	1																		3
AGC/CTG	-	17	8	1			1														27
AGG/CCT	-	29	12	2	2																45
ATC/ATG	-	65	29	9	3						1										107
CCG/CGG	-	5	1																		6
AAAC/GTTT	-	1																			1
AAAG/CTTT	-	1																			1
AAAT/ATTT	-	8	1																		9
AATC/ATTG	-	1																			1
AATG/ATTC	-	1																			1
AATT/AATT	-		1																		1
ACAG/CTGT	-		1																		1
ACAT/ATGT	-			1																	1
ACGC/CGTG	-		1																		1
AGAT/ATCT	-	1	1																		2
AAAAC/GTTTT	1																				1
AAAAG/CTTTT	1																				1
AAAAT/ATTTT	5	1																			6
AAACC/GGTTT	1																				1
AAAGG/CCTTT	1																				1
AAAGT/ACTTT	1																				1
AAATG/ATTTC	2																				2
AACCT/AGGTT	1																				1
AATAC/ATTGT	4	1																			5
AATAG/ATTCT	8	2		2																	12
AATCT/AGATT	2																				2
AATGT/ACATT	1																				1
AAAAAG/CTTTTT	1																				1
AAAAAT/ATTTTT	1																				1
AACCAC/GGTTGT	1																				1
AACCAT/ATGGTT	1																				1
AACTAT/AGTTAT	1																				1
AACTGG/AGTTCC	1																				1
AAGCTG/AGCTTC	1																				1
ACATAT/ATATGT	1																				1
ACCTCC/AGGTGG	2																				2
ACTGCT/AGCAGT	1																				1
AGATCC/ATCTGG	1																				1
ATCCGC/ATGCGG	1	1																			2
