# Supplementary material for: Nutrigenomics in Arma chinensis: Transcriptome Analysis of Arma chinensis Fed on Artificial Diet and Chinese Oak Silk Moth Antheraea pernyi Pupae
Source: PLoS One. 2013 Apr 11;8(4):e60881. doi: 10.1371/journal.pone.0060881 (PMC3623872; doi:10.1371/journal.pone.0060881)
Supplement: Table S14 — Verification of differentially expressed genes by qRT-PCR. (XLS) [file pone.0060881.s017.xls]

## Sheet: Sheet1
Supplemental Table S14. Verification of differentially expressed genes by qRT-PCR
Gene name	Gene ID	Log2 Ratio_Sequencing	Log2 Ratio_qRT-PCR
seminal fluid protein CSSFP066 (Sfp-CSSFD066)	Unigene41003_All	-13.37	-4.23
elongation factor 1-alpha (Ef1-α)	Unigene41798_All	-13.58	-10.77
heat shock protein 83-1 (Hsp83-1)	Unigene36113_All	-11.77	-7.14
heat shock protein 90 (Hsp90)	Unigene39036_All	-11.65	-3.16
antennal esterase CXE19 (Ae-CXE19)	Unigene36533_All	-12.36	-2.36
defensin-like protein precursor (Dlpp)	Unigene35579_All	-11.65	-4.2
odorant binding protein 15 (Obp15)	Unigene40410_All	-10.63	-3.48
lipase-3	CL230.Contig1_All	10.85	1.39
Cu, Zn-superoxide dismutase (Sod)	CL1970.Contig1_All	3.62	1.17
